# Supplementary material for: Electrocatalysis for CO2conversion: from fundamentals to value-added products
Source: Royal Society of Chemistry journal article supplement (doi:10.1039/d0cs00071j), 2021-01-01
Supplement: d0cs00071j1.pdf [file d0cs00071j1.pdf]

## **Electrocatalysis for CO<sub>2</sub> Conversion: from Fundamentals to Value-added Products**

Genxiang Wang,<sup>a,c</sup> Junxiang Chen,<sup>a</sup> Yichun Ding,<sup>a</sup> Pingwei Cai,<sup>a,e</sup> Luocai Yi,<sup>a,e</sup> Yan Li,<sup>a,c</sup> Chaoyang Tu,<sup>d</sup> Yang Hou,<sup>c\*</sup> Zhenhai Wen,<sup>a\*</sup> and Liming Dai<sup>b\*</sup>

*<sup>a</sup>CAS Key Laboratory of Design and Assembly of Functional Nanostructures, and Fujian Provincial Key Laboratory of Nanomaterials, Fujian Institute of Research on the Structure of Matter, Chinese Academy of Sciences, Fuzhou, Fujian 350002, China*

*<sup>b</sup>Centre for Advanced Carbon Materials, School of Chemical Engineering, University of New South Wales, Sydney, NSW2052, Australia*

*<sup>c</sup>Key Laboratory of Biomass Chemical Engineering of Ministry of Education, College of Chemical and Biological Engineering, Zhejiang University, Hangzhou, 310027, China.*

*<sup>d</sup>CAS Key Laboratory of Optoelectronic Materials Chemistry and Physics, Fujian Institute of Research on the Structure of Matter, Chinese Academy of Sciences, Fuzhou, Fujian 350002, China*

*<sup>e</sup>University of Chinese Academy of Sciences, Beijing 100049, P. R. China*

**Email:** [wen@fjirsm.ac.cn](mailto:wen@fjirsm.ac.cn), [yhou@zju.edu.cn](mailto:yhou@zju.edu.cn), [liming.dai@case.edu](mailto:liming.dai@case.edu)

## 1. Parameters in evaluating electrocatalysis of CO<sub>2</sub>RR

In this section, the key parameters in evaluating the performance of electrocatalysts for CO<sub>2</sub>RR, including the onset potential, overpotential, current density, faradaic efficiency, electrochemical surface area, turnover frequency, production rate and Tafel slope, will be elucidated.

### 1.1 Onset potential and overpotential

The onset potential for CO<sub>2</sub>RR is determined by the potential when product is detected by chemical analysis during testing. The overpotential of the CO<sub>2</sub>RR is the difference between the onset potential and equilibrium potential, which is an important indicator of the activity of catalysts, and the smaller the onset potential, the higher catalytic activity for the corresponding catalyst. During the electrochemical test, various reference electrodes can be used and should be corrected before testing CO<sub>2</sub> reduction. The testing potential is generally converted to the potential relative to reverse hydrogen electrode (RHE). Below listed is the conversion equation between several commonly used reference electrodes:

$$E \text{ (vs. RHE)} = E(\text{vs. Ag/AgCl(saturated)}) + 0.197 \text{ V} + 0.0591 \text{ V} \times pH \quad (\text{Eq.1})$$

$$E \text{ (vs. RHE)} = E(\text{vs. Ag/AgCl(3M)}) + 0.210 \text{ V} + 0.0591 \text{ V} \times pH \quad (\text{Eq.2})$$

$$E \text{ (vs. RHE)} = E \text{ (vs. SCE)} + 0.24 \text{ V} + 0.0591 \text{ V} \times pH \quad (\text{Eq.3})$$

$$E \text{ (vs. RHE)} = E \text{ (vs. SHE)} + 0.0591 \text{ V} \times pH \quad (\text{Eq.4})$$

where SHE, and SCE are the abbreviations of standard hydrogen electrode and saturated calomel electrode, respectively. The Ag/AgCl (3 M) indicates the filled solution is 3 M KCl, while Ag/AgCl (saturated) indicates the filled solution is the saturated KCl solution.

### 1.2 Current density

The current density, usually mass current density or area current density, is another crucial parameter for evaluating the reaction rate. It should be pointed out that an enhanced cathodic current in CO<sub>2</sub> atmosphere relative to that in inert gas (*e.g.*, Ar) atmosphere could not be used for judging the occurrence of CO<sub>2</sub>RR, because the adsorbed intermediates (*e.g.*, CO) would lead to a lower current density during

reducing CO<sub>2</sub> into hydrocarbons, and the gradual decrease of pH caused by the dissociation of CO<sub>2</sub> in aqueous solution would also enhance the HER current density.<sup>1</sup> The partial current density of the product for CO<sub>2</sub>RR should be obtained by multiplying the corresponding faradaic efficiency by the overall current density.<sup>25</sup>

### 1.3 Faradaic efficiency (FE)

The faradaic efficiency (FE), also called coulombic efficiency, represents the utilization efficiency of charge (or electrons) involved in a system facilitating an electrochemical reaction, which is normally used to estimate the selectivity of a catalyst for CO<sub>2</sub>RR product, and the calculation formula is expressed as below (Eq.5):

$$FE = \frac{\alpha n F}{Q} \quad (\text{Eq.5})$$

where  $\alpha$  denotes the numbers of transferred electrons (*e.g.*  $\alpha = 2$  for reduction of CO<sub>2</sub> to HCOOH),  $n$  denotes the number of moles of the obtained products,  $F$  is the faradaic constant (96 485 C mol<sup>-1</sup>), and  $Q$  denotes the total charge.

### 1.4 Energy efficiency (EE)

The energy efficiency (EE) is the overall energy utilization toward the desired product, which can be calculated by the following equation:

$$EE = \frac{E_{eq}}{E_{eq} + \eta} \times FE$$

Where  $E_{eq}$  stands for equilibrium potential and  $\eta$  stands for the overpotential of the desired product. According to the equation, we can know that the smaller the overpotential for the desired product, the larger the energy efficiency for the CO<sub>2</sub> reduction.

### 1.5 Electrochemical surface area (ECSA)

The number of electrochemically active sites of an electrode can be evaluated by the electrochemical surface area (ECSA), which is greatly dependent on the nature of electrodes and the preparation method.<sup>2</sup> Notably, not all the electrochemically active sites are catalytically active. The ECSA can be calculated by Eq. 6 as following:<sup>3</sup>

$$ECSA = \frac{C_{dl}}{C_s} \quad (\text{Eq.6})$$

$C_{dl}$  is the electrical double-layer capacitance of which is obtained by scanning cyclic voltammetric stripping of the work electrode in the non-Faradaic regions (non-faradaic current density  $j$ ) at different scan rates  $v$ , *i.e.* the slope of the linearity between  $j$  and  $v$ ,  $C_{dl} = j/v$ .  $C_s$  is the specific capacitance of corresponding smooth metal or oxide electrode.<sup>3</sup>

### 1.6 Turnover frequency (TOF)

The turnover frequency (TOF) is used to quantify the per-site activity of the electrocatalysts, which characterizes the level of catalytic activity. TOF for a specific product  $i$  can be acquired by Eq. 7:

$$TOF(i) = \frac{j \cdot FE(i)}{nFN_a} \quad (\text{Eq.7})$$

where  $j$  is the current density ( $A\ m^{-2}$ ),  $n$  is the mole number of electrons transfer per mole of product  $i$  (*e.g.*,  $n = 2$  for product CO), and  $N_a$  is the active site density of the electrocatalyst ( $mol\ m^{-2}$ ).

### 1.7 Production rate (PR)

The production rate is used to evaluate the practical applicability of a specific electrocatalyst and defines the reaction rate necessary to obtain a particular product. The PR for a certain product (such as CO,  $\alpha = 2$ ) on an electrocatalyst can be estimated by Eq. 8:

$$PR(i) = \frac{j \cdot FE}{\alpha \cdot F} \quad (\text{Eq.8})$$

Production rate is a vital parameter for evaluating the practical applicability of a catalyst for a long-lasting experiment under the steady-state, and it is necessary to estimate the production rate of a desired product in studying a catalyst or device for CO<sub>2</sub>RR.

### 1.8 Tafel slope

The Tafel slope is a plot of overpotential *vs.* logarithm of the partial current density of some product, which is commonly applied to assess electro-kinetic pathway and mechanism of the reaction. The smaller the Tafel slope, the better the catalytic performance of the catalyst. Generally, a Tafel slope of 59  $mV\ dec^{-1}$  for CO<sub>2</sub>RR

means it is a one-electron pre-equilibrium step before a later rate-limiting chemical step, while a Tafel slope of  $118 \text{ mV dec}^{-1}$  suggests that the initial one-electron transfer step forming  $\text{CO}_2^{\cdot-}$  is the rate-determining step of the reaction.

### **1.9 Adsorption energy of the key $\text{CO}_2$ -related intermediate**

The adsorption energy of  $\text{CO}_2^{\cdot*}$  ( $\text{CO}_2^{\cdot-}$  adsorbed on the active site, asterisk (\*) stands for the active site) can be used to evaluate the activity of  $\text{CO}_2$  reduction.<sup>4, 5</sup> Generally, the  $\text{OH}^-$  acts as the surrogate of  $\text{CO}_2^{\cdot*}$ , and the adsorption energy of  $\text{CO}_2^{\cdot*}$  on the surface of catalysts is estimated by performing the anodic linear sweep voltammetry (LSV) curves in  $\text{N}_2$ -saturated alkaline electrolyte (such as 0.1 M KOH). The more negative adsorption peak indicates the stronger bond strength of  $\text{CO}_2^{\cdot*}$ -intermediate(s) with active sites, thus facilitates  $\text{CO}_2$  reduction.

**Table 1.** Performance of Au related materials for CO<sub>2</sub>RR with CO as the main product

| Catalysts                      | Electrolyte              | Durability test | Potential          | Current density/ mA<br>cm <sup>-2</sup> | CO FE | References |
|--------------------------------|--------------------------|-----------------|--------------------|-----------------------------------------|-------|------------|
| Au plate                       | 0.5 M KHCO <sub>3</sub>  | -               | -1.00 V vs. NHE    | -3.7 (pcd)                              | 91%   | 6          |
| oxide-derived Au               | 0.5 M NaHCO <sub>3</sub> | 8 h             | -0.35 V vs. RHE    | -2~4                                    | >96%  | 7          |
| 8 nm Au NPs                    | 0.5 M KHCO <sub>3</sub>  | -               | -0.67 V vs. RHE    | -8                                      | 90%   | 8          |
| 4 nm Au NPs                    | 0.5 M KHCO <sub>3</sub>  | -               | -0.59 V vs. RHE    | -166.1 A g <sup>-1</sup>                | 78%   | 9          |
| Au QDDCs                       | 0.5 M KHCO <sub>3</sub>  | 80 h            | -0.3 V vs. RHE     | 19                                      | 95%   | 10         |
| ER-Au-UR/C                     | 0.1 M KHCO <sub>3</sub>  | 10 h            | -0.68 V vs. RHE    | -4.4                                    | 94.2% | 11         |
| Au NWs                         | 0.5 M KHCO <sub>3</sub>  | 12 h            | -0.35 V vs. RHE    | -1.84 A g <sup>-1</sup>                 | 94%   | 12         |
| Au-NW stacked<br>electrode     | 0.2 M KHCO <sub>3</sub>  | -               | -0.69 V vs. RHE    | m-3                                     | ~93%  | 13         |
| Au <sub>25</sub> nanoclusters  | 0.1 M KHCO <sub>3</sub>  | -               | -0.8 V vs. RHE     | -1.4                                    | 90%   | 14         |
| Au-IO thin films               | 0.5 M KHCO <sub>3</sub>  | -               | -0.51 V vs. RHE    | -                                       | 99%   | 15         |
| Au nanoneedles                 | 0.5 M KHCO <sub>3</sub>  | 8 h             | -0.35 V vs. RHE    | -22                                     | >95%  | 16         |
| Au hierarchical<br>nanoneedles | 0.5 M KHCO <sub>3</sub>  | -               | -0.4V vs. RHE      | -38                                     | 98%   | 17         |
| porous Au film                 | 0.1 M KHCO <sub>3</sub>  | 9 h             | -0.50 V vs. RHE    | -8.3                                    | 91%   | 18         |
| Nanoporous Au                  | 0.1 M NaHCO <sub>3</sub> | 10 h            | -0.60 V vs. RHE    | m-15                                    | 95.9% | 19         |
| Nanoporous Au<br>leaf          | 0.5 M KHCO <sub>3</sub>  | 2.5 h           | -1.2 V vs. Ag/AgCl | -20.51 A g <sup>-1</sup>                | 90%   | 20         |
| Nanoporous Au                  | 0.5 M KHCO <sub>3</sub>  | 10 h            | -0.6 V vs. RHE     | m-17 (pcd)                              | 94%   | 21         |
| Hierarchically<br>porous Au    | 0.2 M KHCO <sub>3</sub>  | -               | -0.374 V vs. RHE   | -                                       | 85.8% | 22         |
| Oxide-derived<br>nanoporous Au | 0.1 M KHCO <sub>3</sub>  | 12 h            | 0.3 V vs. RHE      | m-2.5 (pcd)                             | >90%  | 23         |
| Nano-folded Au                 | 0.1 M KHCO <sub>3</sub>  | -               | 0.5V vs. RHE       | -2.4                                    | 87.4% | 24         |
| Pore-like RA-Au                | 0.2 M KHCO <sub>3</sub>  | -               | -0.39 V vs. RHE    | m-0.25 (pcd)                            | >90%  | 25         |
| Nano-Au                        | 0.5 M KHCO <sub>3</sub>  | 10000s          | -0.57 V vs. RHE    | m-80                                    | ~92%  | 26         |

|                                                |                                                   |                         |                 |                                           |             |     |    |
|------------------------------------------------|---------------------------------------------------|-------------------------|-----------------|-------------------------------------------|-------------|-----|----|
| Au/CNT                                         | 0.5 M NaHCO <sub>3</sub>                          | 12 h                    | -0.50 V vs. RHE | -13 A g <sup>-1</sup>                     | 94%         | 27  |    |
| Au NPs/GNR                                     | 0.5 M KHCO <sub>3</sub>                           | >24 h                   | -0.66 V vs. RHE | <sup>m</sup> -34 A g <sup>-1</sup>        | 92%         | 28  |    |
| Au/CeO <sub>x</sub> -C                         | 0.1 M KHCO <sub>3</sub>                           | -                       | -0.89 V vs. RHE | -12.9 (pcd)                               | 89.1%       | 29  |    |
| Au/C <sub>3</sub> N <sub>4</sub>               | 0.5 M KHCO <sub>3</sub>                           | 15h                     | -0.45 V vs. RHE | -2.48                                     | 90%         | 30  |    |
| Au/Py-CNTs-O                                   | 0.1 M KHCO <sub>3</sub>                           | 10 h                    | -0.58 vs. RHE   | -69 A g <sup>-1</sup> <sub>Au</sub>       | 93%         | 31  |    |
| CTAB-Au/SnO <sub>2</sub>                       | 0.5 M KHCO <sub>3</sub>                           | -                       | -0.5 vs. RHE    | -0.26(pcd)                                | 96%         | 32  |    |
| AuFe core-shell                                | 0.5 M KHCO <sub>3</sub>                           | 90 h                    | -0.4 V vs. RHE  | -48.2                                     | 97.3%       | 33  |    |
| Ordered NPs                                    | AuCu                                              | 0.1 M KHCO <sub>3</sub> | 12 h            | -0.77 V vs. RHE                           | -1.39 (pcd) | 80% | 34 |
| Ag@Au nanowires                                | 0.1 M KHCO <sub>3</sub> <sup>+</sup><br>0.1 M KCl | 12 h                    | -1.14 V vs. RHE | -5.61                                     | 99.65%      | 35  |    |
| AuCu <sub>3</sub> @Au electrode                | 0.1 M KHCO <sub>3</sub>                           | 100 h                   | -0.6 V vs. RHE  | -5.3 (pcd)                                | 97.27%      | 36  |    |
| Au <sub>94</sub> Pd <sub>6</sub> nanoparticles | 0.5 M KHCO <sub>3</sub>                           | 12 h                    | -0.6 V vs. RHE  | -156.1 A g <sub>Pd+Au</sub> <sup>-1</sup> | 96.7%       | 37  |    |
| Dealloyed Au <sub>3</sub> Cu                   | 0.5 M KHCO <sub>3</sub>                           | 5 h                     | -0.38 V vs. RHE | -3                                        | >90%        | 38  |    |
| 4%Au-Cdots-C <sub>3</sub> N <sub>4</sub>       | 0.5 M KHCO <sub>3</sub>                           | 8 h, 60 d               | -0.4 V vs. RHE  | <sup>m</sup> -0.05                        | 79.8%       | 39  |    |
| Cl modified Au                                 | 0.2 M KHCO <sub>3</sub>                           | -                       | -0.39 V vs. RHE | <sup>m</sup> -0.04 (pcd)                  | 79%         | 40  |    |
| Porphyrin functionalized Au NPs                | 0.5 M KHCO <sub>3</sub>                           | 72 h                    | -0.45 V vs. RHE | -2                                        | 93%         | 41  |    |
| Au-OLA                                         | 0.1 M KHCO <sub>3</sub>                           | 10 h                    | -0.65 V vs. RHE | -102 A g <sup>-1</sup>                    | 59%         | 42  |    |
| PEG-modified Au                                | 0.5 M KHCO <sub>3</sub>                           | -                       | -0.57 V vs. RHE | <sup>m</sup> -3 (pcd)                     | 100%        | 43  |    |
| PVA- Au-C                                      | 0.5 M KHCO <sub>3</sub>                           | 24 h                    | -0.77 V vs. RHE | -98.6 (pcd)                               | >90%        | 44  |    |

m: evaluated from the figures, pcd: partial current density

**Table 2.** Performance of Ag-related materials for CO<sub>2</sub>RR with CO as the main product

| Catalysts                                              | Electrolyte                                            | Durability | Potential        | Current density/                       | CO FE | Reference |
|--------------------------------------------------------|--------------------------------------------------------|------------|------------------|----------------------------------------|-------|-----------|
|                                                        |                                                        | test       |                  | mA cm <sup>-2</sup>                    |       |           |
| Ag electrode                                           | 0.1 M CsHCO <sub>3</sub>                               | -          | -1.0 V vs. RHE   | <sup>m</sup> -5.8                      | 80.3% | 45        |
| Ag nanoparticles(>100nm)                               | 18 mol% EMIM BF <sub>4</sub> in H <sub>2</sub> O       | 7 h        | 1.5 V            | -                                      | 96%   | 46        |
| Ag metal                                               | EMIMBF <sub>4</sub> +BMIM NO <sub>3</sub> +0.25mg CoCl | -          | -2.0 V vs. SCE   | -5.4±0.1                               | 98%   | 47        |
| L25-Ag nanocubes                                       | 0.1 M KHCO <sub>3</sub>                                | 18 h       | -0.856 V vs. RHE | <sup>m</sup> -1.7                      | 99%   | 48        |
| Ag NWs (35 nm)                                         | 0.5 M KHCO <sub>3</sub>                                | 12 h       | -0.9 V vs. RHE   | <sup>m</sup> -7                        | 80%   | 49        |
| D-25 Ag NWs (diameter less than 25 nm)                 | 0.1 M KHCO <sub>3</sub>                                | 24 h       | -0.956V vs. RHE  | <sup>m</sup> -3.2                      | 99.3% | 50        |
| Ag NWs (200 nm)                                        | 0.5 M KHCO <sub>3</sub>                                | 24 h       | -0.7V vs. RHE    | -12.22                                 | 84%   | 51        |
| Ag nanoporous                                          | 0.5 M KHCO <sub>3</sub>                                | 2 h        | -0.6 V vs. RHE   | -18                                    | 92%   | 52        |
| 6 μm thick highly porous Ag                            | 0.5 M KHCO <sub>3</sub>                                | 3 h        | -0.5V vs. RHE    | -10.5 (pcd)                            | 82%   | 53        |
| porous Ag                                              | 0.5 M KHCO <sub>3</sub>                                | 4 h        | -1.7 V vs. SCE   | -14                                    | 93%   | 54        |
| Sponge-like porous Ag                                  | 0.1 M KHCO <sub>3</sub>                                | 24 h       | -0.9 V vs. RHE   | <sup>m</sup> -7                        | 93%   | 55        |
| Ag nanosheets                                          | 0.5 M KHCO <sub>3</sub>                                | -          | -0.6 V vs. RHE   | -1.6                                   | >90%  | 56        |
| Ag-IO                                                  | 0.1 M KHCO <sub>3</sub>                                | -          | -0.7 V vs. RHE   | <sup>m</sup> -0.015 (s <sub>CO</sub> ) | 80%   | 57        |
| oxide-derived Ag                                       | 0.1 M KHCO <sub>3</sub>                                | 2 h        | -0.8 V vs. RHE   | -1.15                                  | 89%   | 58        |
| Ag <sub>2</sub> CO <sub>3</sub> -derived Ag            | 0.1 M KHCO <sub>3</sub>                                | 100 h      | -0.55 V vs. RHE  | <sup>m</sup> -1.5                      | >90%  | 59        |
| Ag <sub>2</sub> CO <sub>3</sub> -derived nanoparticles | Ag 0.5 M KHCO <sub>3</sub>                             | -          | -0.67 V vs. RHE  | <sup>m</sup> -4.2(pcd)                 | 96.7% | 60        |
| Carbonate-derived Ag                                   | 1 M KOH(flow reactor)                                  | 24 h       | -0.7 V vs. RHE   | >150                                   | >90%  | 61        |
| Iodide-derived Ag                                      | 0.5 M KHCO <sub>3</sub>                                | 10 h       | -0.7 V vs. RHE   | -16.7                                  | 94.5% | 62        |
| Ag <sub>3</sub> PO <sub>4</sub> -derived Ag            | 0.5 M KHCO <sub>3</sub>                                | 10 h       | -0.7 V vs. RHE   | -2.93                                  | 97.3% | 63        |
| AgCl-derived Ag                                        | NaCl(3.5%)                                             | 24 h       | -1.1 V vs. RHE   | <sup>m</sup> -7.5                      | ~90%  | 64        |



|                                                                |                                                                                 |        |                              |                          |             |    |
|----------------------------------------------------------------|---------------------------------------------------------------------------------|--------|------------------------------|--------------------------|-------------|----|
| rough surface Ag                                               | 0.1 M KHCO <sub>3</sub>                                                         | -      | -1.1 V vs. RHE               | -5.73 (pcd)              | 88.87%      | 65 |
| Cl modified Ag                                                 | 0.1 M KHCO <sub>3</sub>                                                         | 72 h   | -0.48 V vs. RHE              | -2                       | ca.98%      | 66 |
| nonocorals                                                     |                                                                                 |        |                              |                          |             |    |
| Cl modified Ag                                                 | 0.5 M KHCO <sub>3</sub>                                                         | 20 h   | -0.8 V vs. RHE               | -9.40 (pcd)              | 98%         | 67 |
| nanoparticles                                                  |                                                                                 |        |                              |                          |             |    |
| Amine modified Ag                                              | 0.1 M KHCO <sub>3</sub>                                                         | -      | -0.75 V vs. RHE              | -                        | 94.20%      | 68 |
| cysteamine Ag 5 nm nanoparticles                               | 0.5 M KHCO <sub>3</sub>                                                         | -      | -0.75 V vs. RHE              | -3.8 (pcd)               | 84.40%      | 69 |
| SCN modified Ag Foam                                           | 0.5 M KHCO <sub>3</sub>                                                         | 10 h   | -1.3 V vs. RHE               | -32.4                    | 94.8 ± 2.9% | 70 |
| Sodium dodecyl sulfate modified Ag Nps                         | 0.1 M KHCO <sub>3</sub>                                                         | 8 h    | -0.79V vs. RHE               | -8.23                    | 92.2%       | 71 |
| Protein modified Ag NR                                         | 0.5 M KHCO <sub>3</sub>                                                         | 12 h   | -1.128 V vs. RHE             | -7.51                    | 95%         | 72 |
| mixed layer-Ag-MWCNT                                           | 1M KOH                                                                          | -      | -3 V                         | -350                     | >95%        | 73 |
| [PMo <sub>12</sub> O <sub>40</sub> ] <sup>3-</sup> modified Ag | DMF (0.1M [n-Bu <sub>4</sub> N]PF <sub>6</sub> and 0.5% (v/v) H <sub>2</sub> O) | -      | -1.7 V vs. Fc <sup>0/+</sup> | <sup>m</sup> -2.5        | 90 ± 5%     | 74 |
| Benzenethiolate-modified porous Ag                             | 0.1 M KHCO <sub>3</sub>                                                         | -      | -1.03 vs. RHE                | 502 A/g                  | 96%         | 75 |
| Ag film/aminosilane deposited substrate                        | 0.5 M KHCO <sub>3</sub>                                                         | -      | -0.3 V vs. RHE               | -                        | 75.7%       | 76 |
| plasma-activated Ag                                            | 0.1 M KHCO <sub>3</sub>                                                         | 0.5 h  | -0.6 V vs. RHE               | <sup>m</sup> -2.25 (pcd) | >90%        | 77 |
| p-Ag:5                                                         | 0.5 M KHCO <sub>3</sub>                                                         | 5 h    | -1.04 V vs. RHE              | <sup>m</sup> -14         | 83.50%      | 78 |
| anodized Ag                                                    | 0.1 M KHCO <sub>3</sub>                                                         | 2 h    | -0.61 V vs. RHE              | -                        | 92.80%      | 79 |
| 3-D Ag foam                                                    | 0.1 M KHCO <sub>3</sub>                                                         | 12 h   | -0.99 V vs. RHE              | -10.8                    | 94.70%      | 80 |
| Ag foam                                                        | 0.5 M KHCO <sub>3</sub>                                                         | 72 h   | --0.80 V vs. RHE             |                          | >90%        | 81 |
| Air-annealed Ag                                                | 0.1 M KHCO <sub>3</sub>                                                         | 2.66 h | -0.97 V vs. RHE              | -21.2                    | 91.70%      | 82 |
| 40% Ag/TiO <sub>2</sub> reactor)                               | 1 M KOH (flow reactor)                                                          | -      | -1.8 V vs. Ag/AgCl           | -101 (pcd)               | 93%         | 83 |

|                                 |                          |      |                 |                   |      |    |
|---------------------------------|--------------------------|------|-----------------|-------------------|------|----|
| SnO <sub>x</sub> /Ag            | 0.5 M KHCO <sub>3</sub>  | 12 h | -0.6 V vs. RHE  | <sup>m</sup> -1   | 85%  | 84 |
| Ag/(A-Sn(IV)) NPs               | 0.5 M NaHCO <sub>3</sub> | 12 h | -0.7 V vs. RHE  | -7.9              | 88%  | 85 |
| Ag <sub>2</sub> P nano crystals | 0.5 M KHCO <sub>3</sub>  | 12 h | -0.8 V vs. RHE  | <sup>m</sup> -7.5 | 82%  | 86 |
| De-sulfidated Ag NWs            | 0.5 M KHCO <sub>3</sub>  | 18 h | -0.75 V vs. RHE | -1.3              | ~81% | 87 |

m: evaluated from the figures; pcd: partial current density; s<sub>CO</sub>: specific current density of CO

**Table 3.** Performance of Pd-related materials for CO<sub>2</sub>RR with CO as the main product

| Catalysts                            | Electrolyte              | Durability | Potential       | Current density                            | CO FE  | References |
|--------------------------------------|--------------------------|------------|-----------------|--------------------------------------------|--------|------------|
|                                      |                          | test       |                 |                                            |        |            |
| Pd icosahedra/C                      | 0.1 M KHCO <sub>3</sub>  | 10 h       | -0.8 V vs. RHE  | <sup>m</sup> -2 mA cm <sup>-2</sup>        | 91.1%  | 88         |
| Pd octahedra/C                       | 0.1 M KHCO <sub>3</sub>  | 10 h       | -0.7 V vs. RHE  | <sup>m</sup> -0.5 mA cm <sup>-2</sup>      | 53.60% | 88         |
| Pd octahedra NPs                     | 0.5 M NaHCO <sub>3</sub> | -          | -0.7 V vs. RHE  | <sup>m</sup> -16 mA cm <sup>-2</sup> (pcd) | 94%    | 89         |
| Pd NPs (3.7nm)                       | 0.1 M KHCO <sub>3</sub>  | -          | -0.89 V vs. RHE | -23.9A g <sup>-1</sup>                     | 91.20% | 90         |
| Pd NPs                               | 1 M KHCO <sub>3</sub>    |            | -0.7 V vs. RHE  | -22.9 mA cm <sup>-2</sup><br>(pcd)         | 93.4%  | 91         |
| Pd/C                                 | 0.5 M NaHCO <sub>3</sub> | -          | -0.6 V vs. RHE  | <sup>m</sup> -0.3 mA cm <sup>-2</sup>      | ca.48% | 92         |
| Ultra-small Pd NPs                   | 0.5 M KHCO <sub>3</sub>  | 12 h       | -0.6V vs. RHE   | <sup>m</sup> -2 mA cm <sup>-2</sup>        | 92.6%  | 93         |
| Pd <sub>3</sub> Cu nanocrystal       | 0.1 M KHCO <sub>3</sub>  | -          | -0.9 V vs. RHE  | -4.5 mA cm <sup>-2</sup> (pcd)             | 82.10% | 94         |
| Pd <sub>85</sub> Cu <sub>15</sub> /C | 0.1 M KHCO <sub>3</sub>  | -          | -0.89 V vs. RHE | -6.9 mA cm <sup>-2</sup> (pcd)             | 86%    | 95         |
| PdCu                                 | 0.1 M KHCO <sub>3</sub>  | 5 h        | -0.9 V vs. RHE  | -47 mA mg <sub>Pd</sub> <sup>-1</sup>      | 87%    | 96         |
| Pd <sub>0.8</sub> Au                 | 0.5 M KHCO <sub>3</sub>  | 20 h       | -0.6 V vs. RHE  | -2.77 mA cm <sup>-2</sup>                  | 94.3%  | 97         |
| Te-doped Pd                          | 0.1 M KHCO <sub>3</sub>  | 5 h        | -0.8 V vs. RHE  | -4.4 mA cm <sup>-2</sup> (pcd)             | 90.00% | 98         |
| Pd nanosheets(5.1 nm)                | 0.1 M KHCO <sub>3</sub>  | 8 h        | -0.6 V vs. RHE  | -3.0 mA cm <sup>-2</sup>                   | > 90%  | 99         |

m: evaluated from the figures; pcd: partial current density

**Table 4.** Performance of Zn related materials for CO<sub>2</sub>RR with CO as the main product

| Catalysts                        | Electrolyte                                         | Durability | Potential                    | Current density/        | CO FE | References |
|----------------------------------|-----------------------------------------------------|------------|------------------------------|-------------------------|-------|------------|
|                                  |                                                     | test       |                              | mA cm <sup>-2</sup>     |       |            |
| Anodized Zn                      | 0.5 M NaCl                                          | 10h        | -1.6 vs. SCE                 | <sup>m</sup> -2         | 93%   | 100        |
| Dendried Zn                      | 0.5 M NaHCO <sub>3</sub>                            | 3h         | -0.9V vs. RHE                | -4( pcd)                | 62%   | 101        |
| Porous Zn                        | 0.1 M KHCO <sub>3</sub>                             |            | -0.95 V vs. RHE              | -27                     | 95%   | 102        |
| h-Zn                             | 0.5 M KHCO <sub>3</sub>                             | 30h        | -0.9V vs. RHE                | -11.7                   | 84%   | 103        |
| RE-Zn-CO <sub>2</sub>            | 0.5 M KHCO <sub>3</sub>                             | -          | -0.9V vs. RHE                | -6.6                    | 78%   | 104        |
| RE-Zn-CO <sub>2</sub> /KCl       | 0.5 M KCl                                           | -          | -1.05V vs. RHE               | -4.3                    | 95.3% | 202        |
| LiET-Zn/GCE                      | 0.1 M KHCO <sub>3</sub>                             | 4h         | -1.17V vs. RHE               | -26.5                   | 91.1% | 105        |
| LiET-Zn/CPF                      | 0.1 M KHCO <sub>3</sub>                             | -          | -0.8 V vs. RHE               | <sup>m</sup> -5.9 (pcd) | 71.0% | 207        |
| Zn foil                          | PC/TBAP<br>+6.8%H <sub>2</sub> O                    | 4h         | -2.3V vs. Fc/Fc <sup>+</sup> | -6.72                   | 83%   | 106        |
| Oxygen vacancies riched ZnO      | 0.1 M KHCO <sub>3</sub>                             | 8h         | -1.1 V vs. RHE               | -16.1                   | 83%   | 107        |
| rZnO@G                           | EMIM-BF <sub>4</sub> /H <sub>2</sub> O<br>(V/V=7/1) | -          | -0.813 V vs. RHE             | -5.2                    | 83%   | 108        |
| Zn/ZnS                           | 0.1 M KHCO <sub>3</sub>                             | 15 h       | -0.8 V vs. RHE               | -4.28 (pcd)             | 94.2% | 109        |
| Multilayered Zn nanosheets       | 0.5 M NaHCO <sub>3</sub>                            | 7 h        | -1.13 V vs. RHE              | -14                     | 86%   | 110        |
| Porous Zn nanosheets             | 0.1 M KHCO <sub>3</sub>                             | 12 h       | -1.0V vs. RHE                | -8.5                    | >88%  | 111        |
| ZnGa <sub>2</sub> O <sub>4</sub> | 0.1 M KHCO <sub>3</sub>                             | 10 h       | -0.8 V vs. RHE               | <sup>m</sup> -0.5       | 96%   | 112        |

m: evaluated from the figures; pcd: partial current density

**Table 5.** Performance of other metals and metal compounds for CO<sub>2</sub>RR with CO as the main product

| Catalysts                                      | Electrolyte                 | Durability test | Potential       | Current density/<br>mA cm <sup>-2</sup> | CO FE         | Reference |
|------------------------------------------------|-----------------------------|-----------------|-----------------|-----------------------------------------|---------------|-----------|
| CuO-derived Cu NWs                             | 0.1 M KHCO <sub>3</sub>     | -               | -0.60 V vs. RHE | <sup>m</sup> -0.6                       | ~50%          | 113       |
| ECR Cu NWs                                     | 0.5 M KHCO <sub>3</sub>     | -               | -0.41 V vs. RHE | -1                                      | ~60%          | 114       |
| ECR-Cu NWs                                     | 0.1 M KHCO <sub>3</sub>     | -               | -0.40 V vs. RHE | <sup>m</sup> 0.45                       | ~62%          | 115       |
| Cu nanopillar (5h)                             | 0.1 M KHCO <sub>3</sub>     | 6 h             | -0.5 V vs. RHE  | <sup>m</sup> -1.23                      | 28.67%        | 116       |
| Cu hollow fibers                               | 0.3 M KHCO <sub>3</sub>     | 24 h            | -0.4 V vs. RHE  | <sup>m</sup> -9                         | 75%           | 117       |
| Cu-IOs                                         | 0.1 M KHCO <sub>3</sub>     | 10 h            | -0.6 V vs. RHE  | -1.2                                    | 45.3%         | 118       |
| CuO-IO                                         | 0.1 M KHCO <sub>3</sub>     | 24 h            | -0.6 V vs. RHE  | <sup>m</sup> -2.5                       | 72.5±1.8<br>% | 119       |
| Cu nanosheets                                  | 0.5 M KHCO <sub>3</sub>     | 20 h            | -1.0 V vs. RHE  | -23 (pcd)                               | 74.1%         | 120       |
| Sn-modified Cu <sub>2</sub> O                  | 0.1 M KHCO <sub>3</sub>     | 12 h            | -0.6 V vs. RHE  | <sup>m</sup> -8.0 (pcd)                 | (CE) 75%      | 121       |
| Sn-decorated Cu <sub>x</sub> O NWs             | 0.1 M KHCO <sub>3</sub>     | 12 h            | -0.80 V vs. RHE | -4.5 (pcd)                              | 90%           | 122       |
| Cu/SnO <sub>2</sub> core-shell                 | 0.5 M KHCO <sub>3</sub>     | -               | -0.7 V vs. RHE  | -4.6                                    | 93%           | 123       |
| Cu-Sn alloy                                    | 0.1 M KHCO <sub>3</sub>     | 14 h            | -0.6 V vs. RHE  | -1                                      | >90%          | 124       |
| Cu <sub>22</sub> Sn                            | 0.1 M KHCO <sub>3</sub>     | 6 h             | -0.81 V vs. RHE | <sup>m</sup> -2                         | 92%           | 125       |
| Cu <sub>2</sub> Cd/Cd/Cu                       | 0.1 M KHCO <sub>3</sub>     | 12 h            | -0.80 V vs. RHE | -8                                      | 84%           | 126       |
| Sn catalysts                                   | MeCN (100 mM<br>[MEMIM]OTf) | 1 h             | -1.95 V vs. SCE | -5                                      | 77%           | 127       |
| Cu/Ni(OH) nanosheets                           | 0.5 M NaHCO <sub>3</sub>    | 22 h            | -0.5 V vs. RHE  | -4.3                                    | 92%           | 128       |
| Cu <sub>x</sub> Ni <sub>y</sub> /N-C           | 0.5 M KHCO <sub>3</sub>     | 38 h            | -0.6 V vs. RHE  | -18.8                                   | 94.5%         | 129       |
| Co <sub>0.75</sub> Ni <sub>0.25</sub> /N-C NFs | 0.5 M NaHCO <sub>3</sub>    | 20 h            | -0.9 V vs. RHE  | -13.4                                   | 85%           | 130       |
| Cu <sub>2</sub> O/CuO@Ni                       | 0.5 M KHCO <sub>3</sub>     | 25 h            | -1.2 V vs. RHE  | <sup>m</sup> -27                        | 95%           | 131       |
| Cu-In alloy                                    | 0.1 M KHCO <sub>3</sub>     | 7 h             | -0.5 V vs. RHE  | <sup>m</sup> -0.5                       | 90%           | 132       |
| Cu-In alloy (CuInO <sub>2</sub> )              | 0.1 M KHCO <sub>3</sub>     | 5 h             | -0.80 V vs. RHE | <sup>m</sup> -2.0                       | 70%           | 133       |
| CuIn alloy NWs                                 | 0.5 M KHCO <sub>3</sub>     | 15 h            | -0.60 V vs. RHE | -2.66(pcd)                              | >68.2%        | 134       |
| InCuO-0.92                                     | 0.5 M KHCO <sub>3</sub>     | 24 h            | -0.80 V vs. RHE | -11.2                                   | 92.1%         | 135       |

|                                                       |                                                                                 |        |                    |                    |             |     |
|-------------------------------------------------------|---------------------------------------------------------------------------------|--------|--------------------|--------------------|-------------|-----|
| In/Cu NWs                                             | 0.1 M KHCO <sub>3</sub>                                                         | 60 h   | -0.60 V vs. RHE    | -1.7               | >90%        | 136 |
| Nanoporous Cu-In                                      | 0.1 M KHCO <sub>3</sub>                                                         | 7 h    | -0.95 V vs. RHE    | -4.5               | 91%         | 137 |
| CuO-In <sub>2</sub> O <sub>3</sub> /NCNTs             | 0.1 M KHCO <sub>3</sub>                                                         | 10 h   | -0.70 V vs. RHE    | -4.3(pcd)          | 93%         | 138 |
| CuIn-ESP25min                                         | 1 M KOH (flow cell)                                                             | -      | -1.17 V vs. RHE    | -200               | ~90%        | 139 |
| In-doped Cu@Cu <sub>2</sub> O                         | 0.1 M KHCO <sub>3</sub>                                                         | 4 h    | -0.80 V vs. RHE    | -(11.1 ± 0.85)     | 87.6 ± 2.2% | 140 |
| Ag <sub>91</sub> Cu <sub>9</sub>                      | 0.1 M KHCO <sub>3</sub>                                                         | 10 h   | -0.70 V vs. RHE    | -5.6               | 80.6%       | 141 |
| h-CuS MCs                                             | 0.5 M KHCO <sub>3</sub>                                                         | 10 h   | -0.16 V vs. RHE    | <sup>m</sup> -0.01 | 32.7%       | 142 |
| 3D Cu-Ag                                              | 0.5 M KHCO <sub>3</sub> (flow cell)                                             | 15 h   | -0.80 V vs. RHE    | <sup>m</sup> -9    | 95.7%       | 143 |
| Cu/CA                                                 | 0.1 M KHCO <sub>3</sub>                                                         | 10 h   | -0.60 V vs. RHE    | <sup>m</sup> -3    | 75.6%       | 144 |
| Cu <sub>3</sub> P/C                                   | 0.1 M NaHCO <sub>3</sub>                                                        | 2000 s | -0.30 V vs. RHE    | -0.05              | 47%         | 145 |
| CuO-Cu@BC                                             | 0.5 M KHCO <sub>3</sub>                                                         | 40 h   | -0.60 V vs. RHE    | <sup>m</sup> -4.8  | 53%         | 146 |
| Ag <sub>0.66</sub> In <sub>0.34</sub>                 | 0.5 M KHCO <sub>3</sub>                                                         | -      | -1.3 V vs. SCE     | <sup>m</sup> -0.5  | 68.8%       | 147 |
| <i>In situ</i> reduced-In <sub>2</sub> O <sub>3</sub> | 0.1 M Na <sub>2</sub> SO <sub>4</sub>                                           | -      | -1.0 V vs. Ag/AgCl | <sup>m</sup> -0.25 | ~100%       | 148 |
| Co <sub>3</sub> O <sub>4</sub> nanofibers             | 0.1 M TBAPF <sub>6</sub> in acetonitrile + 0.1% <sub>vol</sub> H <sub>2</sub> O | 8 h    | -1.56 V vs. NHE    | -0.5               | 65%         | 149 |
| Ga gel/C                                              | 0.1 M KHCO <sub>3</sub>                                                         | 2000 s | -0.70 V vs. RHE    | <sup>m</sup> -5    | 77.0%       | 150 |
| MoS <sub>2</sub>                                      | 4 mol% EMIM-BF <sub>4</sub> in water                                            | 10 h   | -0.764 V vs. RHE   | -65                | 98%         | 151 |
| Mo <sub>0.95</sub> Nb <sub>0.05</sub> S <sub>2</sub>  | 50 vol% EMIM-BF <sub>4</sub> in water                                           | -      | -0.8 V vs. RHE     | -237               | 82%         | 152 |
| WSe <sub>2</sub>                                      | 50/50 vol% IL (EMIM-BF <sub>4</sub> )/water                                     | -      | -0.164 V vs. RHE   | -18.95             | 24%         | 153 |
| MoS <sub>2</sub> -PEI-modified graphene oxide         | 0.5 M NaHCO <sub>3</sub>                                                        | 3 h    | -0.65 V vs. RHE    | <sup>m</sup> -4    | 85%         | 154 |
| TiO <sub>2</sub> @MoS <sub>2</sub>                    | 0.1 M NaHCO <sub>3</sub>                                                        | 14 h   | -0.7 V vs. RHE     | -83                | 82%         | 155 |
| Fluorosilance-decorated                               | 6 mol% EMIM-BF <sub>4</sub> in                                                  | 10 h   | -0.92 V vs. RHE    | <sup>m</sup> -25   | 81.2%       | 156 |

|                                                    |                                                                 |        |                               |                          |        |     |  |
|----------------------------------------------------|-----------------------------------------------------------------|--------|-------------------------------|--------------------------|--------|-----|--|
| MoS <sub>2</sub>                                   | water                                                           |        |                               |                          |        |     |  |
| N-MoS <sub>2</sub> @NCDs-180                       | EMIM-BF <sub>4</sub> solutions                                  | 10 h   | -0.9 V vs. RHE                | -36.2                    | 90.2%  | 157 |  |
|                                                    | (94 mol% H <sub>2</sub> O)                                      |        |                               |                          |        |     |  |
| Ag <sub>2</sub> S NWs                              | 50 vol% EMIM-BF <sub>4</sub> +<br>50 vol% H <sub>2</sub> O      | 19 h   | -0.864 V vs. RHE              | <sup>m</sup> -10.2 (pcd) | 92%    | 158 |  |
| MoSeS monolayer                                    | 4 mol% EMIM BF <sub>4</sub> +<br>96% H <sub>2</sub> O           | 10 h   | -1.15 V vs. RHE               | -43                      | 45.2%  | 159 |  |
| CdS                                                | 0.1M KHCO <sub>3</sub>                                          | 10 h   | -1.2 V vs. RHE                | -21.9 (pcd)              | 81%    | 160 |  |
| CdS nanoneedle arrays                              | 5 M KOH(flow cell)                                              | 4 h    | -1.2 V vs. RHE                | -212                     | ~95.5% | 161 |  |
| CdS-CNTs                                           | 0.5 M KHCO <sub>3</sub>                                         | 10 h   | -1.2 V vs. RHE                | -11.4                    | 92%    | 162 |  |
| F-γ-In <sub>2</sub> Se <sub>3</sub> /CP            | 30wt%[Bmim]PF <sub>6</sub> /65w<br>t%MeCN/5 wt%H <sub>2</sub> O | 5 h    | -2.0 V vs. SCE                | -55.3                    | 96.5%  | 163 |  |
| Cd nanoparticles derived<br>Cd(OH) <sub>2</sub>    | [BMIM]PF <sub>6</sub> + MeCN                                    | 10 h   | -1.85 V vs. RHE               | -59.0 (pcd)              | 99.2%  | 164 |  |
| Ga gel/C                                           | 0.1M KHCO <sub>3</sub>                                          | -      | -0.71 V vs. RHE               | -10.7                    | 77%    | 150 |  |
| Fe <sub>4.5</sub> Ni <sub>4.5</sub> S <sub>8</sub> | MeCN(24 ppm H <sub>2</sub> O)                                   | -      | -1.8V vs. NHE                 | -3                       | 87%    | 165 |  |
| Pb/PbO@OMC-800                                     | [Bmim]BF <sub>4</sub> (0.5 M)-<br>MeCN                          | 10 h   | -2.3 V vs. Ag/Ag <sup>+</sup> | -41.3                    | 98.3%  | 166 |  |
| Hierarchical<br>nanocages-300                      | CoS <sub>2</sub> 0.5 M KHCO <sub>3</sub>                        | 2000 s | -0.60 V vs. RHE               | -2.8(pcd)                | 85.7%  | 167 |  |

m: evaluated from the figures; pcd: partial current density; CE: current efficiency.

**Table 6.** CO<sub>2</sub>RR performance of heteroatom-doped carbon materials with CO as the main product

| Catalysts                                        | Electrolyte                           | Durability | Potential       | Current density/    | FE <sub>CO</sub> | Active sites                            |
|--------------------------------------------------|---------------------------------------|------------|-----------------|---------------------|------------------|-----------------------------------------|
|                                                  |                                       | test       |                 | mA cm <sup>-2</sup> |                  |                                         |
| Fe-N-C(Fe <sub>0.5</sub> d) <sup>168</sup>       | 0.5 M NaHCO <sub>3</sub>              | -          | -0.6V vs. RHE   | m-7.5               | 80%              | FeN <sub>4</sub> sites                  |
| Fe-N-C <sup>169</sup>                            | 0.1 M NaHCO <sub>3</sub>              | -          | -0.6V vs. RHE   | m-2.5               | 80%              | N moieties                              |
| Fe-N-C <sup>170</sup>                            | 0.1 M KHCO <sub>3</sub>               | -          | -0.55 V vs. RHE | m-2.5               | 65%              | Fe-N <sub>x</sub> moieties              |
| Fe-N-C-950 <sup>171</sup>                        | 0.1 M KHCO <sub>3</sub>               | 12 h       | -0.6V vs. RHE   | -1.2                | 74%              | Fe-N sites                              |
| Ni-N-C <sup>172</sup>                            | 0.5 M KHCO <sub>3</sub>               | 12 h       | -0.67 V vs. RHE | -3.9                | 93%              | Atomically dispersed Ni sites           |
| NiAsS/PTF <sup>173</sup>                         | 0.5 M KHCO <sub>3</sub>               | 10 h       | -0.8 V vs. RHE  | -14.4               | 98%              | Ni-N <sub>4</sub>                       |
| Ni-N-CNS <sup>174</sup>                          | 0.5 M KHCO <sub>3</sub>               | 25 h       | -0.75 V vs. RHE | m-5.5               | 95.3%            | Ni-N                                    |
| Fe/Ni-NC <sup>175</sup>                          | 0.5 M KHCO <sub>3</sub>               | 50 h       | -1.0 V vs. RHE  | -10                 | 96%              | N-C and Fe/Ni nano-alloy                |
| Ni-N <sub>3</sub> -V/CC <sup>176</sup>           | 0.5 M KHCO <sub>3</sub>               | 14 h       | -0.8 V vs. RHE  | m-50                | 94%              | Ni-N <sub>3</sub> -Vacancy              |
| Fe-N-C <sup>177</sup>                            | 0.1 M KHCO <sub>3</sub>               | -          | -0.6 V vs. RHE  | m-4.5               | 85%              | -                                       |
| Fe <sub>x</sub> N@Fe-N-C <sup>178</sup>          | 0.1 M KHCO <sub>3</sub>               | 24 h       | -0.53 V vs. RHE | -4.71               | 95%              | Encased Fe <sub>x</sub> N               |
| Fe/Fe <sub>3</sub> C@NCNT-750 <sup>179</sup>     | 0.5 M KHCO <sub>3</sub>               | -          | -0.74 V vs. RHE | m-11                | 50%              | -                                       |
| Fe <sub>3</sub> N <sub>x</sub> /C <sup>180</sup> | 0.1 M Na <sub>2</sub> SO <sub>4</sub> | 5 h        | -0.6 V vs. RHE  | m-2.5               | 85%              | Fe <sub>x</sub> N and C-N-based centers |
| Fe-N-G/bC <sup>181</sup>                         | 0.1 M KHCO <sub>3</sub>               | 12 h       | -0.66 V vs. RHE | m-7.5               | 95%              | -                                       |
| Fe <sup>3+</sup> -N-C <sup>182</sup>             | 0.5 M KHCO <sub>3</sub> (flow cell)   | 30 h       | -0.45 V vs. RHE | -94(pcd)            | >90%             | Fe <sup>3+</sup> sites                  |
| Fe-NS-C <sup>183</sup>                           | 0.5 M KHCO <sub>3</sub>               | 30 h       | -0.56 vs. RHE   | -11                 | >90%             | Doped S and Fe-N <sub>x</sub>           |
| FeNPCN <sup>184</sup>                            | 0.1 M KHCO <sub>3</sub>               | 12 h       | -0.5 V vs. RHE  | m-0.7               | 94%              | C <sub>1</sub> N coordinated atomic Fe  |



|                                     |                         |      |                    |                          |       |                                    |
|-------------------------------------|-------------------------|------|--------------------|--------------------------|-------|------------------------------------|
| Fe-SAs/N-C <sup>185</sup>           | 0.5 M NaCl              | -    | -0.45 V vs. RHE    | m-7                      | 99.6% | Single iron atoms                  |
| Fe-N/O-C(MZ) <sup>186</sup>         | 0.1 M KHCO <sub>3</sub> | 22 h | -0.58 V vs. RHE    | -5.4(pcd)                | 96%   | Fe-N <sub>4</sub> O sites          |
| MPPCN-750 <sup>187</sup>            | 0.5 M KHCO <sub>3</sub> | 12 h | -0.7 V vs. RHE     | m-1.2                    | 95.9% | Fe-N <sub>4</sub>                  |
| H-M-G <sup>188</sup>                | 0.1 M KHCO <sub>3</sub> | 24 h | -0.46 V vs. RHE    | m-1.7                    | 97%   | FeN <sub>5</sub>                   |
| Fe-CNPs <sup>189</sup>              | 1 M KHCO <sub>3</sub>   | 8 h  | -0.58 V vs. RHE    | m-7                      | 98.8% | Fe-N                               |
| rGO-PVP-ZIFc <sup>190</sup>         | 0.5 M KHCO <sub>3</sub> | 8 h  | -0.62 V vs. RHE    | m-6.5                    | 98.6% | Fe-N                               |
| Fe-SA/NCS-700 <sup>191</sup>        | 0.5 M KHCO <sub>3</sub> | 10 h | -0.45 V vs. RHE    | m-10                     | 87%   | Fe-N <sub>4</sub>                  |
| Ni-N-Gr <sup>192</sup>              | 0.1 M KHCO <sub>3</sub> | 5 h  | -0.7 V vs. RHE     | m-0.6                    | >90%  | Ni-N site                          |
| Ni-N <sub>4</sub> -C <sup>193</sup> | 0.5 M KHCO <sub>3</sub> | 30 h | -0.81 V vs. RHE    | -28.6                    | 99%   | Ni-N <sub>4</sub> sites            |
| Ni-N-C <sup>194</sup>               | 0.1 M KHCO <sub>3</sub> | 9 h  | -0.75 V vs. RHE    | -8.2                     | 96%   | Ni-N                               |
| Ni-N-MEGO <sup>195</sup>            | 0.5 M KHCO <sub>3</sub> | 21 h | -0.7 V vs. RHE     | 53.6 mA mg <sup>-1</sup> | 92.1% | Ni-N                               |
| Ni-SA-NCs <sup>196</sup>            | 0.5 M KHCO <sub>3</sub> | 9 h  | -1.0 V vs. RHE     | ~50                      | 99%   | Ni-N <sub>4</sub>                  |
| NiSA-NGA-900 <sup>197</sup>         | 0.5 M KHCO <sub>3</sub> | 6 h  | -0.8 V vs. RHE     | -5                       | 90.2% | Unsaturated Ni-N sites             |
| Ni-N-C <sup>198</sup>               | 0.1 M KHCO <sub>3</sub> | 10 h | -0.75 V vs. RHE    | -7.51(pcd)               | 97%   | Edge-hosted Ni-N <sub>2+2</sub>    |
| Ni(NC) <sup>199</sup>               | 0.5 M KHCO <sub>3</sub> | 20 h | -0.75 V vs. RHE    | m-9                      | 99%   | Low-valent Ni-N motifs             |
| Ni-N-C <sup>200</sup>               | 0.5 M KHCO <sub>3</sub> | 22 h | -0.9 V vs. RHE     | m-10                     | 91.2% | Single Ni atoms                    |
| Ni/N-CHS <sup>201</sup>             | 0.5 M KHCO <sub>3</sub> | 15 h | -0.9 V vs. RHE     | -15                      | 93.1% | N-C                                |
| NC-CNTs (Ni) <sup>202</sup>         | 0.1 M KHCO <sub>3</sub> | 10 h | -0.8 V vs. RHE     | m-7                      | >90%  | Ni@N <sub>3</sub> (pyrrolic) sites |
| SANi-GO <sup>203</sup>              | 0.5 M KHCO <sub>3</sub> | 50 h | -0.63 V vs. RHE    | -8.3(pcd)                | 96.6% | Ni-N <sub>4</sub>                  |
| NiSA-NWC <sup>204</sup>             | 0.1 M KHCO <sub>3</sub> | 2 h  | -1.6 V vs. Ag/AgCl | m-5                      | 95%   | Ni <sup>+</sup>                    |
| Ni@NCNTs <sup>205</sup>             | 0.5 M KHCO <sub>3</sub> | 20 h | -0.8 V vs. RHE     | -8.01(pcd)               | 99.1% | Confined Ni NPs                    |
| Ni@NC-900 <sup>206</sup>            | 0.1 M KHCO <sub>3</sub> | 50 h | -1.0 V vs. RHE     | -17(pcd)                 | 96%   | -                                  |
| Ni-NPC/CMTs <sup>207</sup>          | 0.5 M KHCO <sub>3</sub> | 48 h | -0.77 V vs. RHE    | -11.2                    | 94%   | Ni-N <sub>x</sub> and              |

|                                                |                                     |                         |                  |               |       |                                   |                        |
|------------------------------------------------|-------------------------------------|-------------------------|------------------|---------------|-------|-----------------------------------|------------------------|
|                                                |                                     |                         |                  |               |       |                                   | pyridine N             |
| Ni-N-OMMCs <sup>208</sup>                      | 0.1 M KHCO <sub>3</sub>             | 25 h                    | -0.7 V vs. RHE   | m-1.5         | 98%   | -                                 |                        |
| Ni SAC <sup>209</sup>                          | 0.5 M KHCO <sub>3</sub>             | 8 h                     | -0.6 V vs. RHE   | -15           | 95.2% | Atomic sites                      | Ni-N                   |
| Ni-/N-C <sup>210</sup>                         | 0.5 M KHCO <sub>3</sub>             | 36 h                    | -0.61 V vs. RHE  | m-9           | 97.5% | -                                 |                        |
| NiN <sub>x</sub> CNT <sup>211</sup>            | 0.5 M KHCO <sub>3</sub>             | 44 h                    | -0.676 V vs. RHE | -9(pcd)       | 98%   | Ni-N <sub>x</sub>                 |                        |
| Zn-N-C <sup>212</sup>                          | 0.5 M KHCO <sub>3</sub>             | 15 h                    | -0.5 V vs. RHE   | m-3.9         | 90.8% | Zn-N <sub>x</sub>                 |                        |
| ZIF-Fe-CNT-FA-p <sup>213</sup>                 | 0.1 M NaHCO <sub>3</sub>            | -                       | -0.56 V vs. RHE  | -1.9 (pcd)    | 97%   | pyridinic N and Fe-N <sub>x</sub> |                        |
| C-AFC@ZIF-8 <sup>214</sup>                     | 1.0 M KHCO <sub>3</sub>             | -                       | -0.43 V vs. RHE  | m-4.8         | 93%   | Fe-N                              |                        |
| AD-Sn/N-C1000 <sup>215</sup>                   | 0.1 M KHCO <sub>3</sub>             | 24 h                    | -0.6 V vs. RHE   | -1.75 (pcd)   | 91%   | Sn species and pyridinic N        |                        |
| Single Ni sites <sup>216</sup>                 | 0.5 M KHCO <sub>3</sub>             | 60 h                    | -1.0 V vs. RHE   | -7.37 (pcd)   | ~71%  | single Ni sites                   |                        |
| Co-N <sub>2</sub> <sup>217</sup>               | 0.5 M KHCO <sub>3</sub>             | 60 h                    | -0.63 vs. RHE    | -18.1         | 93%   | Co-N <sub>2</sub> site            |                        |
| Co-N <sub>5</sub> /HNPCs <sup>218</sup>        | 0.2 M KHCO <sub>3</sub>             | 10 h                    | -0.73 vs. RHE    | -4.5 (pcd)    | 99.2% | Co-N <sub>5</sub> site            |                        |
| Co <sub>1</sub> -N <sub>4</sub> <sup>219</sup> | 0.1 M KHCO <sub>3</sub>             | 10 h                    | -0.8 vs. RHE     | -15.7         | 82%   | Co <sub>1</sub> -N <sub>4</sub>   |                        |
| CoSA/HCNFs <sup>220</sup>                      | 0.1 M KHCO <sub>3</sub>             | 50 h                    | -0.9 vs. RHE     | -67(pcd)      | 91%   | Co single-atoms                   |                        |
| A-Ni-NG <sup>221</sup>                         | 0.5 M KHCO <sub>3</sub>             | 100 h                   | -0.61 vs. RHE    | -22 (pcd)     | 97%   | Ni(I) atom center                 |                        |
| Ni-NCB <sup>222</sup>                          | 0.5 M KHCO <sub>3</sub> (flow cell) | 24 h                    | -0.66 vs. RHE    | m-25          | 99%   | Ni SAs                            |                        |
| NiSA-N-CNTs <sup>223</sup>                     | 0.5 M KHCO <sub>3</sub>             | 12 h                    | -0.7 vs. RHE     | -23.5 (pcd)   | 91%   | Ni single-atom                    |                        |
| Unsaturated doped carbon <sup>224</sup>        | Ni-N porous                         | 1.0 M KHCO <sub>3</sub> | 12 h             | -0.63 vs. RHE | m-25  | 97.8%                             | Unsaturated Ni-N sites |
| NiSA/PCFM <sup>225</sup>                       | 0.5 M KHCO <sub>3</sub>             | 120 h                   | -1.0 vs. RHE     | -308.4(pcd)   | 88%   | Ni single atoms                   |                        |
| Cu-N <sub>2</sub> /GN <sup>226</sup>           | 0.1 M KHCO <sub>3</sub>             | 10 h                    | -0.5 vs. RHE     | m-1           | 81%   | Cu-N <sub>2</sub>                 |                        |
| ZnN <sub>4</sub> -based single-                | 0.5 M KHCO <sub>3</sub>             | >75 h                   | -0.43 vs. RHE    | -24.8         | 95%   | ZnN <sub>4</sub>                  |                        |

| atom <sup>227</sup>                                                                |                                       |        |                 |             |       |                                                            |
|------------------------------------------------------------------------------------|---------------------------------------|--------|-----------------|-------------|-------|------------------------------------------------------------|
| ZIF-8 <sup>228</sup>                                                               | 0.25 M K <sub>2</sub> SO <sub>4</sub> |        | -1.1 V vs. RHE  | -6.9 (pcd)  | 81%   | imidazolate<br>ligands<br>coordinated<br>Zn(II) center     |
| Ni <sup>2+</sup> @NG <sup>229</sup>                                                | 0.5 M KHCO <sub>3</sub>               | -      | -0.68 V vs. RHE | -10.2       | 92%   | Ni <sup>2+</sup> @NG                                       |
| CNT@f-NiNC <sup>230</sup>                                                          | 0.5 M KHCO <sub>3</sub>               | 10 h   | -0.6V vs. RHE   | ~-(4.5±0.5) | 80±3% | -                                                          |
| Ni-NC SAC <sup>231</sup>                                                           | 0.5 M KHCO <sub>3</sub>               | -      | -0.85V vs. RHE  | -30(pcd)    | 89%   | Ni-based active<br>sites                                   |
| Ni/NC_950 <sup>232</sup>                                                           | 0.1 M KHCO <sub>3</sub>               | 9 h    | -0.8 V vs. RHE  | m-4         | 92.3% | Ni sites                                                   |
| Ni-PACN <sup>233</sup>                                                             | 0.1 M KHCO <sub>3</sub>               | -      | -0.8 V vs. RHE  | -14(pcd)    | >95%  | Pyrrrolic<br>coordinated-Ni<br>atoms                       |
| Ni-TAPc <sup>234</sup>                                                             | 0.5 M KHCO <sub>3</sub>               | 100 h  | -0.65V vs. RHE  | -17.5       | 99%   | Ni <sup>+</sup>                                            |
| Sb-NC <sup>235</sup>                                                               | 0.1 M KHCO <sub>3</sub>               | 24 h   | -0.9 V vs. RHE  | -2.9        | 82%   | Site sites and<br>pyridinic N                              |
| SE-Ni SAS@PNC <sup>236</sup>                                                       | 0.5 M KHCO <sub>3</sub>               | 60 h   | -1.0 V vs. RHE  | -18.3       | 87.8% | single Ni sites<br>and porous NC                           |
| (Cl, N)-Mn/G <sup>237</sup>                                                        | 0.5 M KHCO <sub>3</sub>               | 12 h   | -0.6 V vs. RHE  | -10         | 97%   | Modified Mn<br>sites                                       |
| Bi-N <sub>4</sub> <sup>238</sup>                                                   | 0.1 M NaHCO <sub>3</sub>              | 4 h    | -0.5 V vs. RHE  | -5.1        | 97%   | Bi-N <sub>4</sub>                                          |
| Pd-NC <sup>239</sup>                                                               | 0.5 M NaHCO <sub>3</sub>              | 3.5 h  | -0.5 V vs. RHE  | m-0.55      | 55%   | Pd-N <sub>4</sub>                                          |
| Y <sub>1</sub> /NC <sup>240</sup>                                                  | 0.5 M KHCO <sub>3</sub>               | 12 h   | -0.68 V vs. RHE | m-0.2       | 88.3% | Y SACs                                                     |
| Sc <sub>1</sub> /NC <sup>240</sup>                                                 | 0.5 M KHCO <sub>3</sub>               | 12 h   | -0.68 V vs. RHE | m-0.18      | 81.3% | Sc SACs                                                    |
| Ag <sub>2</sub> /G <sup>241</sup>                                                  | 0.5 M KHCO <sub>3</sub>               | > 36 h | -0.7 V vs. RHE  | -11.87      | 93.4% | AgN <sub>3</sub> - AgN <sub>3</sub>                        |
| Cu-APC/Pd <sub>10</sub> Te <sub>3</sub> <sup>242</sup>                             | 0.2 M KHCO <sub>3</sub>               | 3 h    | -0.78 V vs. RHE | -8.6 (pcd)  | 92%   | Cu <sub>1</sub> <sup>0</sup> -Cu <sub>1</sub> <sup>+</sup> |
| ZrO <sub>2</sub> /N-C <sup>243</sup>                                               | 0.5 M KHCO <sub>3</sub>               | 5 h    | -0.4 V vs. RHE  | -2.6        | 64%   | ZrO <sub>2</sub> NPs                                       |
| Co <sub>3</sub> O <sub>4</sub> -CDots-C <sub>3</sub> N <sub>4</sub> <sup>244</sup> | 0.5 M KHCO <sub>3</sub>               | 30 h   | -0.6 V vs. RHE  | m-1.3       | 89%   | C <sub>3</sub> N <sub>4</sub>                              |
| CoPc/CNT(3.5%) <sup>245</sup>                                                      | 0.1 M KHCO <sub>3</sub>               | 1 h    | -0.63 V vs. RHE | -10         | 92%   | -                                                          |
| Ni-NC_ATPA@C <sup>246</sup>                                                        | 0.5 M KHCO <sub>3</sub>               | 24 h   | -0.7 V vs. RHE  | -6          | ~93%  | Ni nanoparticles                                           |

|                                             |                                           |       |                               |                       |               |  |                                            |
|---------------------------------------------|-------------------------------------------|-------|-------------------------------|-----------------------|---------------|--|--------------------------------------------|
|                                             |                                           |       |                               |                       |               |  | and N doping                               |
| CoPc-CN/CNT<br>(3.5%) <sup>232</sup>        | 0.1 M KHCO <sub>3</sub>                   | 1 h   | -0.63 V vs. RHE               | -15                   | 98%           |  | CNT and cyano-<br>group                    |
| CoFPC/C <sup>247</sup>                      | 0.5 M NaHCO <sub>3</sub>                  | -     | -0.8 V vs. RHE                | <sup>m</sup> -4.3     | 93%           |  | CoFPC                                      |
| FeOx/FePc <sup>248</sup>                    | 0.5 M KHCO <sub>3</sub>                   | 2 h   | -0.40 V vs. RHE               | <sup>m</sup> -4.0     | 93.0±4.8<br>% |  | in situ formed<br>FeO <sub>x</sub> /E-FePc |
| CoTPP-CNT <sup>249</sup>                    | 0.5 M KHCO <sub>3</sub>                   | 4 h   | -1.35 V vs. SCE               | -3.2                  | 91%           |  | CoTPP                                      |
| FeTPP-WSCAT <sup>250</sup>                  | 0.1 M KCl + 0.5<br>M KHCO <sub>3</sub>    |       | -0.52V vs. RHE                | <sup>m</sup> -1.0     | ca.92%        |  | -                                          |
| FePGF/CFP <sup>251</sup>                    | 0.1 M KHCO <sub>3</sub>                   | 10 h  | -0.54 V vs. RHE               | -1.68                 | 98.7%         |  | FePGF                                      |
| CAT <sub>pyr</sub> <sup>252</sup>           | 0.5 M KHCO <sub>3</sub>                   | 12 h  | -0.59 V vs. RHE               | <sup>m</sup> -0.24    | 93%           |  | -                                          |
| [Co(qpy)] <sup>2+</sup> /CNT <sup>253</sup> | 0.5 M NaHCO <sub>3</sub>                  | 4.5 h | -0.45 V vs. RHE               | -19.9                 | 100%          |  | [Co(qpy)] <sup>2+</sup>                    |
| FePGH-H <sup>254</sup>                      | 0.1 M KHCO <sub>3</sub>                   | 20 h  | -0.39 V vs. RHE               | -0.42                 | 96.2          |  | FeTMAP                                     |
| NiPor-CTF <sup>255</sup>                    | 0.5 M KHCO <sub>3</sub>                   | 20 h  | -0.9 V vs. RHE                | ~-52.9                | 97%           |  | NiN <sub>4</sub>                           |
| CoPc@Fe-N-C <sup>256</sup>                  | 0.5 M KOH(flow<br>cell)                   | 20 h  | -0.84 V vs. RHE               | -(275.6<br>27.0)(pcd) | ± >90%        |  | CoPc                                       |
| (CoPc+Phenol)GDE <sup>25</sup><br>7         | 0.5 M<br>KHCO <sub>3</sub> (flow<br>cell) | 100 h | 2.52 V                        | 200                   | 88%           |  | CoPc and<br>Phenol                         |
| Co <sup>II</sup> Pc-tsGQwire <sup>258</sup> | 0.5 M [Bmim]Tf<br>2 N MeCN                | -     | -2.1 V vs. Ag/Ag <sup>+</sup> | -11.5                 | 82.4%         |  | -                                          |
| Ni-CTF <sup>259</sup>                       | 0.1 M KHCO <sub>3</sub>                   | 3 h   | -0.8 V vs. RHE                | <sup>m</sup> -1       | 90%           |  | CTF                                        |
| ZIF-A-LD <sup>260</sup>                     | 0.1 M KHCO <sub>3</sub>                   | 10 h  | -1.0 V vs. RHE                | <sup>m</sup> -3       | 90.57         |  | sp <sup>2</sup> C atoms                    |
| CoPP@CNT <sup>261</sup>                     | 0.5 M NaHCO <sub>3</sub>                  | 12 h  | -0.6 V vs. RHE                | -25.1                 | 98.3%         |  | CoPP                                       |
| CoPc-Pyr <sup>262</sup>                     | 0.05 K <sub>2</sub> CO <sub>3</sub>       | 5 h   | -0.7 V vs. RHE                | -2.5                  | 95%           |  | -                                          |
| POM-MnL <sup>263</sup>                      | 0.5 M KHCO <sub>3</sub>                   | 12 h  | -0.72 V vs. RHE               | <sup>m</sup> -16      | 95%           |  | MnL                                        |
| Co@Pc/C <sup>264</sup>                      | 0.5 M KHCO <sub>3</sub>                   | 20 h  | -0.9 V vs. RHE                | -28(pcd)              | 84%           |  | Pyridinic N and<br>Co NPs                  |
| Co-TTCOF <sup>265</sup>                     | 0.5 M KHCO <sub>3</sub>                   | 40 h  | -0.7 V vs. RHE                | -1.84(pcd)            | 91.3%         |  | TTF and Co<br>porphyrin                    |

m: evaluated from the figures; pcd: partial current density

**Table 7.** CO<sub>2</sub>RR performance of non-metal carbons with CO as the main product

| Catalysts                                          | Electrolyte                     | Durability test | Potential           | Current density                             | FE <sub>CO</sub> | Active sites                    |
|----------------------------------------------------|---------------------------------|-----------------|---------------------|---------------------------------------------|------------------|---------------------------------|
| CNFs <sup>266</sup>                                | EMIM-BF <sub>4</sub>            | 9 h             | -0.573 vs. SHE      | <sup>m</sup> -3.5                           | 98%              | reduced carbons                 |
| NCNT-3-700 <sup>267</sup>                          | 0.5 M NaHCO <sub>3</sub>        | 60 h            | -0.9V vs. RHE       | -5 (pcd)                                    | 90%              | quaternary N                    |
| 3-DN-doped graphene foam <sup>268</sup>            | 0.1 M KHCO <sub>3</sub>         | 5 h             | -0.58V vs. RHE      | -1.82                                       | 85%              | pyridinic N                     |
| Nano CNT <sup>269</sup>                            | N-doped 0.1 M KHCO <sub>3</sub> | 10 h            | -0.8 V vs. RHE      | -0.75                                       | 80%              | pyridinic N                     |
| NCNTs-ACN-850 <sup>270</sup>                       | 0.1 M KHCO <sub>3</sub>         | -               | -1.05 V vs. RHE     | -                                           | 80%              | pyridinic N                     |
| Nitrogen-doped carbon <sup>271</sup>               | 1 M KCl                         | -               | -1.46 V vs. Ag/AgCl | -29.2 A/g                                   | 98%              | doped-N                         |
| 2D-pg-C <sub>3</sub> N <sub>4</sub> <sup>272</sup> | 2 M KHCO <sub>3</sub>           | 35000s          | -1.1V vs. Ag/AgCl   | -3                                          | 80%              | Polarized<br>melem subunits     |
| NDC-700 <sup>273</sup>                             | 0.5 M NaHCO <sub>3</sub>        | 72 h            | -0.82 V vs. RHE     | -6.6 (pcd)                                  | 83.70%           | pyridinic N                     |
| ZIF-CNT-FA-p <sup>213</sup>                        | 0.1 M NaHCO <sub>3</sub>        | -               | -0.66 V vs. RHE     | -1.8 (pcd)                                  | 97%              | pyridinic N                     |
| ZIF-CNT-FA-p <sup>213</sup>                        | 0.1 M NaHCO <sub>3</sub>        | -               | -0.86 V vs. RHE     | -7.7 (pcd)                                  | 100%             | pyridinic N                     |
| H-CNT <sup>274</sup>                               | 0.1 M KHCO <sub>3</sub>         | 24000s          | -0.5 V vs. RHE      | <sup>m</sup> -0.5                           | 88%              | pyrrolic<br>nitrogen            |
| NC-900 <sup>275</sup>                              | 0.1 M KHCO <sub>3</sub>         | 2 h             | -0.93 V vs. RHE     | -1.1 (pcd)                                  | 78%              | pyridinic N and<br>quaternary N |
| F interlayer doped carbon (FC) <sup>276</sup>      | 0.1 M NaClO <sub>4</sub>        | -               | -0.62 vs. RHE       | <sup>m</sup> -0.2 (pcd)                     | 89.6%            | doped F                         |
| NF-C-950 <sup>277</sup>                            | 0.1 M KHCO <sub>3</sub>         | 40 h            | -0.6 vs. RHE        | -1.9                                        | 90%              | Co-doped F and<br>N             |
| F-CPC <sup>278</sup>                               | 0.5 M KHCO <sub>3</sub>         | 12 h            | -1.0 vs. RHE        | -37.5                                       | 88.3%            | Cagelike<br>structure           |
| N-GRW <sup>279</sup>                               | 0.5 M KHCO <sub>3</sub>         | 10 h            | -0.6 vs. RHE        | -15.4 A g <sub>catalyst</sub> <sup>-1</sup> | 87.6%            | pyridinic N                     |
| thermally-treated                                  | 0.5 M KHCO <sub>3</sub>         | 12 h            | -0.68 vs. RHE       | -1.2 (pcd)                                  | 82%              | pyridinic N                     |

|                                           |                                   |         |                              |                        |       |                          |
|-------------------------------------------|-----------------------------------|---------|------------------------------|------------------------|-------|--------------------------|
| triazine-based                            |                                   |         |                              |                        |       |                          |
| framework <sup>280</sup>                  |                                   |         |                              |                        |       |                          |
| MNC-D <sup>281</sup>                      | 0.1 M KHCO <sub>3</sub>           | 16 h    | -0.58 vs. RHE                | -6.8                   | 92%   | Pyridinic N and defects  |
| CNPC-1100 <sup>282</sup>                  | 0.1 M KHCO <sub>3</sub>           | 8 h     | -0.6 vs. RHE                 | -1.0                   | 92%   | N defects                |
| NCNTs <sup>283</sup>                      | 0.5 M NaHCO <sub>3</sub>          | 40 h    | -0.8 vs. RHE                 | -20.2                  | 95%   | Pyridinic N defects      |
| OA-PCN <sup>284</sup>                     | 0.5 M NaHCO <sub>3</sub>          | 24 h    | -0.66 vs. RHE                | <sup>m</sup> -0.8      | 40.1% | -OH and -NH <sub>2</sub> |
| NS-C-900 <sup>285</sup>                   | 0.1 M KHCO <sub>3</sub>           | 20 h    | -0.6 vs. RHE                 | -2.63                  | 92%   | Co-doped S and N         |
| D-NC-1100 <sup>286</sup>                  | 0.1 M KHCO <sub>3</sub>           | 10 h    | -0.6 vs. RHE                 | <sup>m</sup> -0.8      | 94.5% | C defects                |
| NC-900-HH <sup>287</sup>                  | 0.5 M NaHCO <sub>3</sub>          | 10 h    | -0.5 vs. RHE                 | -0.4                   | 90%   | Pyridinic N              |
| WNCNs-1000 <sup>288</sup>                 | 0.1 M KHCO <sub>3</sub>           | 8 h     | -0.49 vs. RHE                | <sup>m</sup> -0.5      | 84%   | Pyridinic N              |
| Se-CN <sub>s</sub> <sup>289</sup>         | 0.1 M KHCO <sub>3</sub>           | 19 h    | -0.6 vs. RHE                 | <sup>m</sup> -9        | 90%   | Doped Se                 |
| NC1100 <sup>290</sup>                     | 0.5 M KHCO <sub>3</sub>           | 20 h    | -0.5 vs. RHE                 | <sup>m</sup> -1        | 95.4% | Pyridinic N              |
| 1D/2D NR/CS-900 <sup>291</sup>            | 0.5 M KHCO <sub>3</sub>           | 30 h    | -0.45 vs. RHE                | <sup>m</sup> -1        | 94.2% | Pyridinic N              |
| NSHCF900 <sup>292</sup>                   | 0.1 M KHCO <sub>3</sub>           | 36 h    | -0.7 V vs. RHE               | -103                   | 94%   | Co-doped N and S         |
| CPSN <sup>293</sup>                       | 0.1 M KHCO <sub>3</sub>           | 27 h    | -0.99 V vs. RHE              | <sup>m</sup> -3.2      | 11.3% | pyridinic N              |
| S, N, Cl doped C <sup>294</sup>           | 0.1 M KHCO <sub>3</sub>           | 18 h    | -0.6 vs. RHE                 | -1.98(pcd)             | 95.9% | Co-doped N and Cl        |
| NSCNW-3 <sup>295</sup>                    | 0.1 M KHCO <sub>3</sub>           | 20 h    | -0.6 vs. RHE                 | -5.93(pcd)             | 93.4% | 3D structure and doped S |
| NS-CNS <sub>s</sub> <sup>296</sup>        | 0.5 M KHCO <sub>3</sub>           | 20 h    | -0.55 vs. RHE                | <sup>m</sup> -2.4(pcd) | 85.4% | Co-doped N and S         |
| NPCA <sup>297</sup>                       | 0.5 M [Bmim]PF <sub>6</sub> /MeCN | 24 h    | 2.4 V vs. Ag/Ag <sup>+</sup> | -143.6(pcd)            | 99.1% | Co-doped P and N         |
| Silkcocoon derived carbons <sup>298</sup> | 0.1 M KHCO <sub>3</sub>           | 10 days | -1.09 vs. RHE                | -0.8(pcd)              | 89%   | Pentagon-containing      |

---

|                      |                         |      |               |                   |       |                                              |
|----------------------|-------------------------|------|---------------|-------------------|-------|----------------------------------------------|
|                      |                         |      |               |                   |       | defects                                      |
| NDC-4 <sup>299</sup> | 0.1 M KHCO <sub>3</sub> | -    | -1.1 vs. RHE  | -                 | 82%   | Doped N                                      |
| DHPC <sup>300</sup>  | 0.5 M KHCO <sub>3</sub> | 25 h | -0.5 vs. RHE  | <sup>m</sup> -1.2 | 99.5% | Mesoporous and<br>carbon defect<br>structure |
| NPC <sup>301</sup>   | 0.5 M KHCO <sub>3</sub> | 18 h | -0.55 vs. RHE | -3.01             | 98.4% | Pyridinic and<br>graphitic N                 |

---

m: evaluated from the figures; pcd: partial current density

**Table 8.** CO<sub>2</sub>RR performance of catalysts with HCOOH/HCOO<sup>-</sup> as the main product

| Catalysts                              | Electrolyte                                                          | Durability | Potential                     | Current                            | FE          | Reference |
|----------------------------------------|----------------------------------------------------------------------|------------|-------------------------------|------------------------------------|-------------|-----------|
|                                        |                                                                      | test       |                               | density/<br>mA<br>cm <sup>-2</sup> |             |           |
| Sn NPs/GDL                             | 0.5 M NaHCO <sub>3</sub>                                             | -          | -1.6 V vs. NHE                | -27                                | 70%         | 302       |
| Sn/GDE                                 | 0.5 M KHCO <sub>3</sub>                                              | -          | -1.8 V vs. Ag/AgCl            | -17.43±2.6                         | 78.60±0.11% | 303       |
| Sn(100 nm)/GDE                         | 0.5 M KHCO <sub>3</sub>                                              | -          | -1.6 V vs. SCE                | m-7.5                              | ~80%        | 304       |
| Sn quantum sheets confined in graphene | 0.1 M NaHCO <sub>3</sub>                                             | 50 h       | -1.8 V vs. SCE                | -21.1                              | 89%         | 305       |
| Sn metal electrodes                    | [Bimim]PF <sub>6</sub> (30wt %)/acetonitrile/H <sub>2</sub> O (5wt%) | -          | -2.3 V vs. Ag/Ag <sup>+</sup> | -32                                | 92%         | 306       |
| 5nm SnO <sub>2</sub> NPs/graphene      | 0.1 M NaHCO <sub>3</sub>                                             | -          | -1.8 V vs. SCE                | -10.2                              | 86.2%       | 307       |
| 5nm SnO <sub>2</sub> /C                | 0.1 M KHCO <sub>3</sub>                                              | 12 h       | -0.9V vs. RHE                 | m-4                                | 54.2%       | 308       |
| Ultra-small SnO <sub>2</sub>           | 1 M KHCO <sub>3</sub>                                                | -          | -1.21V vs. RHE                | -145                               | 64%         | 309       |
| Sn-OH-5.9                              | 1 M KHCO <sub>3</sub>                                                | 60 h       | -1.8 V vs. Ag/AgCl            | m-17                               | 82.5%       | 310       |
| Ov-N-SnO <sub>2</sub>                  | 0.1 M KHCO <sub>3</sub>                                              | 12 h       | -1.7V vs. SCE                 | m-4.2                              | 88%         | 311       |
| Sn@MJKTs                               | 0.5 M KHCO <sub>3</sub>                                              | 5 h        | -0.9 V vs. RHE                | -19.9                              | 94%         | 312       |
| Sn/CNT-Agls/CC                         | 0.5 M KHCO <sub>3</sub>                                              | 2000 s     | -0.96 V vs. RHE               | -26.7                              | 82.7%       | 313       |
| Sn/SnS <sub>2</sub> /rGO               | 0.5 M NaHCO <sub>3</sub>                                             | 14h        | -1.4 V vs. Ag/AgCl            | -11.75 (pcd)                       | 84.5%       | 314       |
| SnO <sub>2</sub> @n-pc                 | 0.5 M [Bmim]PF <sub>6</sub>                                          | 5 h        | -2.2 V vs. Ag/Ag <sup>+</sup> | -28.4                              | 94.1%       | 315       |
| SL-NG@Sn foil                          | 0.5 M KHCO <sub>3</sub>                                              | 5 h        | -1.0 V vs. RHE                | -21.3(pcd)                         | 92%         | 316       |
| CNT#SnO <sub>2</sub> DSs               | 0.1 M KHCO <sub>3</sub>                                              | 10 h       | -0.9 V vs. RHE                | m-4                                | 70%         | 317       |



|                                                  |                          |         |                      |                        |        |     |
|--------------------------------------------------|--------------------------|---------|----------------------|------------------------|--------|-----|
| electrodeposited                                 | 0.1 M KHCO <sub>3</sub>  | -       | -1.4 V vs. SCE       | -0.75                  | 91.7%  | 318 |
| Sn                                               |                          |         |                      |                        |        |     |
| Sn/SnO <sub>x</sub> thin-film                    | 0.5 M NaHCO <sub>3</sub> | -       | -0.7 V vs. RHE       | -(0.4-0.6)             | 19.0%  | 319 |
| Commercial Sn NPs                                | Catholyte-free           | 48 h    | 2.2 V (cell voltage) | -51.7                  | 93.3%  | 320 |
| SnO <sub>x</sub> /Sn                             | 0.1 M KHCO <sub>3</sub>  | -       | 1.2 V                | m <sub>-</sub> 3.0     | 64.0%  | 321 |
| Sn/SnO <sub>x</sub>                              | 0.1 M KHCO <sub>3</sub>  | 12 h    | -1.2 V vs. RHE       | -11.2                  | 89.6%  | 322 |
| SnO <sub>2</sub> /0.14@N-rGO                     | 0.5 M NaHCO <sub>3</sub> | 20 h    | -0.8 vs. RHE         | -21.3                  | 78±2%  | 323 |
| Single-atom Sn <sup>δ+</sup> on N-doped graphene | 0.25 M KHCO <sub>3</sub> | 200 h   | -1.0 vs. SCE         | m <sub>-</sub> 11.8    | 74.3%  | 324 |
| V <sub>o</sub> -SnO <sub>x</sub> /CF-40          | 0.1 M KHCO <sub>3</sub>  | 12 h    | -1.0 vs. RHE         | -36                    | 86%    | 325 |
| Sn dendrites                                     | 0.1 M KHCO <sub>3</sub>  | -       | -1.36 V vs. RHE      | -17.1                  | 71.60% | 326 |
| Dendritic Sn/Cu                                  | 0.5 M KHCO <sub>3</sub>  | 20 h    | -0.95 V vs. RHE      | m <sub>-</sub> 13      | 67.3%  | 327 |
| Sn-pNWs                                          | 0.1 M KHCO <sub>3</sub>  | 15 h    | -0.8 V vs. RHE       | m <sub>-</sub> 5.5     | 80.0%  | 328 |
| Mesoporous SnO <sub>2</sub>                      | 0.1 M KHCO <sub>3</sub>  | -       | -1.15 V vs. RHE      | -10.8                  | 75%    | 329 |
| Porous Sn foam                                   | 0.1 M KHCO <sub>3</sub>  | 55 h    | -1.6 V vs. Ag/AgCl   | m <sub>-</sub> 6       | 95.6%  | 330 |
| SnO <sub>x</sub> -300                            | 0.5 M KHCO <sub>3</sub>  | 18 h    | -0.98 V vs. RHE      | -15(pcd)               | 88.6%  | 331 |
| mp-SnO <sub>2</sub>                              | 0.5 M NaHCO <sub>3</sub> | 12 h    | -0.9 V vs. RHE       | m <sub>-</sub> 14(pcd) | 83%    | 332 |
| SnO <sub>2</sub> QWs                             | 0.1 M KHCO <sub>3</sub>  | 25000 s | -1.156 V vs. RHE     | -13.7                  | 87.3%  | 333 |
| SnO <sub>2</sub> -NFs                            | 0.5 M KHCO <sub>3</sub>  | 12 h    | -1.0 V vs. RHE       | -9.4(pcd)              | 82.1%  | 334 |
| SnO <sub>2</sub> /CC                             | 0.5 M NaHCO <sub>3</sub> | 24 h    | -0.8 V vs. RHE       | -45(pcd)               | 87±2%  | 335 |
| SnO <sub>x</sub> @MWCN                           | 0.5 M KHCO <sub>3</sub>  | 20 h    | -1.25V vs. SHE       | m <sub>-</sub> 9.5     | 77%    | 336 |
| T-COOH                                           |                          |         |                      |                        |        |     |
| SnS <sub>2</sub> /Aminated-C                     | 0.5 M KHCO <sub>3</sub>  | 15 h    | -0.9 V vs. RHE       | 41.1(pcd)              | 92.6%  | 337 |

|                                                    |                          |         |                 |                   |        |     |
|----------------------------------------------------|--------------------------|---------|-----------------|-------------------|--------|-----|
| SnO                                                | 0.1 M KHCO <sub>3</sub>  | 10 h    | -1.2 V vs. RHE  | -13.03            | 81.2%  | 338 |
| 2NC@EEG                                            |                          |         |                 |                   |        |     |
| WIT SnO <sub>2</sub>                               | 0.1 M KHCO <sub>3</sub>  | 14 h    | -0.99 V vs. RHE | <sup>m</sup> -6.1 | 63%    | 339 |
| FSP-SnO <sub>2</sub> -5                            | 0.1 M KHCO <sub>3</sub>  | -       | -1.1V vs. RHE   | -23.7             | 85%    | 340 |
| 5%Ni-SnS <sub>2</sub>                              | 0.1 M KHCO <sub>3</sub>  | 8 h     | -0.9 V vs. RHE  | -19.6             | 80%    | 341 |
| BiO <sub>x</sub> modified                          | 0.5 M KHCO <sub>3</sub>  | 10 h    | -1.37 V vs. RHE | -45               | 90.8%  | 342 |
| 2D SnO <sub>x</sub>                                |                          |         |                 |                   |        |     |
| SrSnO <sub>3</sub> NWs                             | 0.5 M NaHCO <sub>3</sub> | 10 h    | -1.3 V vs. RHE  | -21.6(pcd)        | 77.6%  | 343 |
| SnSe <sub>2</sub> @CC                              | 0.1 M KHCO <sub>3</sub>  | 10 h    | -0.76 V vs. RHE | -12.0(pcd)        | 88.4%  | 344 |
| SnO <sub>2</sub> /PC                               | 0.5 M KHCO <sub>3</sub>  | 10 h    | -0.86 V vs. RHE | -29.0(pcd)        | 92%    | 345 |
| SL-NG@Sn foil                                      | 0.5 M KHCO <sub>3</sub>  | 5 h     | -10 V vs. RHE   | -21.3(pcd)        | 92%    | 316 |
| Cu/SnO <sub>x</sub> -CNT                           | 0.1 M KHCO <sub>3</sub>  | -       | -0.99 V vs. RHE | -4.0(pcd)         | 77%    | 346 |
| (30.2%)                                            |                          |         |                 |                   |        |     |
| Cu@Sn                                              | 0.1 M KHCO <sub>3</sub>  | 10 h    | -1.1 V vs. RHE  | -57.7             | 90.4%  | 347 |
| nanocones                                          |                          |         |                 |                   |        |     |
| Cu@Sn                                              | 0.5 M KHCO <sub>3</sub>  | 15 h    | -0.93 V vs. RHE | 16.52             | 100%   | 348 |
| electrodes                                         |                          |         |                 |                   |        |     |
| Cu <sub>6</sub> Sn <sub>5</sub>                    | 0.1 M KHCO <sub>3</sub>  | 6 h     | -1.17 V vs. RHE | <sup>m</sup> -6   | 73%    | 125 |
| Sn-Cu                                              | 0.1 KHCO <sub>3</sub>    | 12 h    | -0.95 V vs. RHE | <sup>m</sup> -7   | 92%    | 349 |
| Cu <sub>3</sub> Sn/Cu <sub>6</sub> Sn <sub>5</sub> | 0.1 NaHCO <sub>3</sub>   | 42 h    | -1.0 V vs. RHE  | -18.9             | 82%    | 350 |
| CuSn NWs/C-                                        | 0.5 KHCO <sub>3</sub>    | 10 h    | -1.0 V vs. RHE  | -17.33(pcd)       | 90.2%  | 351 |
| Air                                                |                          |         |                 |                   |        |     |
| Cu <sub>(1)</sub> Sn <sub>(4)</sub> -N-CC          | 0.5 KHCO <sub>3</sub>    | 20 h    | -0.97 V vs. RHE | -15.56(pcd)       | 90.24% | 352 |
| Mn-doped SnO <sub>2</sub>                          | 0.1 KHCO <sub>3</sub>    | 28400 s | -1.03V vs. RHE  | -21.2(pcd)        | ~85%   | 353 |
| Cu <sub>3</sub> NiOCs                              | 0.5 KHCO <sub>3</sub>    | 25 h    | -0.57 V vs. RHE | -10.9(pcd)        | 95.9%  | 354 |
| Cu <sub>2</sub> O/CuO/CuS                          | 0.1 KHCO <sub>3</sub>    | 2.5 h   | -0.7 V vs. RHE  | -20(pcd)          | 84%    | 355 |
| SW-                                                | 0.5 KHCO <sub>3</sub>    | 20 h    | -0.64 V vs. RHE | -5.7(pcd)         | 98.2%  | 356 |
| Cu <sub>2</sub> O/Cu(60                            |                          |         |                 |                   |        |     |
| atm)                                               |                          |         |                 |                   |        |     |

|                                    |                                                                      |       |                                |                     |             |     |
|------------------------------------|----------------------------------------------------------------------|-------|--------------------------------|---------------------|-------------|-----|
| AgSn/SnO <sub>x</sub>              | 0.5 M NaHCO <sub>3</sub>                                             | 25 h  | -0.8 V vs. RHE                 | -16(pcd)            | 87.2%       | 357 |
| core-shell                         |                                                                      |       |                                |                     |             |     |
| Ag-SnS <sub>2</sub>                | 0.5 KHCO <sub>3</sub>                                                | 10 h  | -1.0 V vs. RHE                 | -23.3(pcd)          | 60.0%       | 358 |
| SnO <sub>x</sub> /AgO <sub>x</sub> | 0.1 M KHCO <sub>3</sub>                                              | 20 h  | -0.8 V vs. RHE                 | m-3.5(pcd)          | 21.1%       | 359 |
| Cu-Sn/rGO                          | 0.5 M NaHCO <sub>3</sub>                                             | 6 h   | -0.99 V vs. RHE                | -23.6               | 87.4%       | 360 |
| CuSn <sub>3</sub>                  | 0.1 M KHCO <sub>3</sub>                                              | 50 h  | -0.5V vs. RHE                  | -33                 | 95%         | 361 |
| Bi-Sn                              | 0.5 M KHCO <sub>3</sub>                                              | 100 h | -1.14 V vs. RHE                | m-55(pcd)           | 94±2%       | 362 |
| CdCu@Cu                            | 0.5 M NaHCO <sub>3</sub>                                             | 12 h  | -1.05 V vs. RHE                | -30.5(pcd)          | 70.5%       | 363 |
| TNS-2.0-SnO <sub>2</sub>           | 0.1 M KHCO <sub>3</sub>                                              | 18 h  | -1.6 V vs. RHE                 | -22.5               | 73%         | 364 |
| SnO <sub>x</sub> /Ag               | 0.1 M KHCO <sub>3</sub>                                              | 12 h  | -1.0 V vs. RHE                 | m-7.5               | 83%         | 84  |
| GDE-In/C                           | 0.1 M Na <sub>2</sub> SO <sub>4</sub>                                | 15 h  | -1.65 V vs. Ag/AgCl            | m-8.5               | 45%         | 365 |
| Pb                                 | 0.1 M K <sub>2</sub> CO <sub>3</sub>                                 | -     | -1.5 V vs. SCE                 | -4.4                | 95%         | 366 |
| Pb cubic                           | 0.1 M KHCO <sub>3</sub>                                              | -     | -1.7 V vs. Ag/AgCl             | -25                 | 94.1%(278K) | 367 |
| roughed Pb                         | 0.1 M KHCO <sub>3</sub>                                              | -     | -0.96 V vs. RHE                | -1.17(pcd)          | 88%         | 368 |
| OD-Pb                              | 0.5 M NaHCO <sub>3</sub>                                             | 4.5 h | -0.7 V vs. RHE                 | -4.6                | ~90         | 369 |
| Pb meltal electrodes               | [Bimim]PF <sub>6</sub> (30wt %)/acetonitrile/H <sub>2</sub> O (5wt%) | 6 h   | -2.3 V vs. Ag/Ag <sup>+</sup>  | -37                 | 91.6        | 306 |
| Pb-PhyA                            | [Bzmim]BF <sub>6</sub> (12.8wt %)/ H <sub>2</sub> O(9.9wt%)          | 5 h   | -2.25 V vs. Ag/Ag <sup>+</sup> | -30.5               | 92.7%       | 370 |
| Porous Pb                          | 1.0 M KHCO <sub>3</sub>                                              | 6 h   | -0.99 V vs. RHE                | -7.5 (pcd)          | 97%         | 371 |
| Pb QDDCs                           | 0.5 M KHCO <sub>3</sub>                                              | 80 h  | -0.2 V vs. RHE                 | -16                 | 95%         | 10  |
| SD-Pb                              | 1.0 M KHCO <sub>3</sub>                                              | 2 h   | -1.08 V vs. RHE                | -12 (pcd)           | 88%         | 372 |
| SELF-CAT-Pb                        | KHCO <sub>3</sub>                                                    | 6 h   | -1.2 V vs. RHE                 | -22 (pcd)           | 90.5%       | 373 |
| FD-PbNP/MWCNT/CPE                  | 0.5 M KHCO <sub>3</sub>                                              | 10 h  | -1.7 V vs. Ag/AgCl             | -28                 | 84.6%       | 374 |
| PbS-150/C                          | 0.1 M KHCO <sub>3</sub>                                              | 10 h  | -1.2 V vs. RHE                 | -( 52.2 ± 5.2)      | 97.6 ± 5.3% | 375 |
|                                    |                                                                      |       |                                | mA mg <sup>-1</sup> |             |     |

|                                                            |                                                    |       |                     |                    |       |     |
|------------------------------------------------------------|----------------------------------------------------|-------|---------------------|--------------------|-------|-----|
| Pb <sub>2.25</sub> Pd <sub>3.75</sub>                      | 0.5 M HCOOK                                        | -     | -1.5 V vs. Ag/AgCl  | -5.6 (pcd)         | 85%   | 376 |
| 4-aminomethylbenzene modified Pb                           | 1 M KHCO <sub>3</sub>                              | 11 h  | -1.09 V vs. RHE     | -9.0               | >90%  | 375 |
| Bi dendrite                                                | 0.5 M KHCO <sub>3</sub>                            | 12 h  | -0.74 V vs. RHE     | -2.7               | 89%   | 377 |
| Bi dendrite                                                | 0.5 M KHCO <sub>3</sub>                            | -     | -1.26 V vs. RHE     | -68.51 ±4.04 (pcd) | ~100% | 378 |
| Bi nanoflake                                               | 0.1 M KHCO <sub>3</sub>                            | 10 h  | -0.60 V vs. RHE     | m-1.0              | ~100% | 379 |
| BiO <sub>x</sub> /C                                        | 0.5 M NaHCO <sub>3</sub> /0.5 M NaClO <sub>4</sub> | -     | -1.37 V vs. Ag/AgCl | m-1.3              | 93.4% | 380 |
| Bi/GDE                                                     | 0.5M KHCO <sub>3</sub>                             | 20 h  | -1.45 V vs. SCE     | -1.5 (pcd)         | 90%   | 381 |
| BiOI derived nanosheets                                    | 0.5M NaHCO <sub>3</sub>                            | 10 h  | -1.5 V vs. SCE      | -15~16             | ~95%  | 382 |
| Bi <sub>5</sub> O <sub>7</sub> I                           | 0.5 M KHCO <sub>3</sub>                            | 18 h  | -0.89 vs. RHE       | -13.2 (pcd)        | 89%   | 383 |
| BiOBr derived 2D Bi                                        | 0.1 M KHCO <sub>3</sub>                            | 65 h  | -0.9 vs. RHE        | m-70               | >90%  | 384 |
| BiOBr derived 2D Bi                                        | 2.0 M KHCO <sub>3</sub>                            | -     | -                   | -200               | 90%   | 384 |
| Bi nanosheets(~10nm)                                       | 0.5M NaHCO <sub>3</sub>                            | 5 h   | -1.0 V vs. RHE      | m-13               | >90%  | 385 |
| Defect-rich Bi derived from Bi <sub>2</sub> S <sub>3</sub> | 0.5M NaHCO <sub>3</sub>                            | 24 h  | -0.75 V vs. RHE     | m-5                | 84%   | 386 |
| Bi <sub>2</sub> O <sub>2</sub> CO <sub>3</sub> nanosheets  | 0.5M NaHCO <sub>3</sub>                            | 12 h  | -0.7 V vs. RHE      | -11                | 85%   | 387 |
| Bi <sub>2</sub> O <sub>2</sub> CO <sub>3</sub> derived Bi  | 0.1 M KHCO <sub>3</sub>                            | 100 h | -0.8 V vs. RHE      | m-6                | 95%   | 388 |

|                                           |                         |       |                  |             |          |     |
|-------------------------------------------|-------------------------|-------|------------------|-------------|----------|-----|
| nanosheets                                |                         |       |                  |             |          |     |
| Bi-based                                  | 0.5 M KHCO <sub>3</sub> | 7 h   | -1.0 V vs. RHE   | -40         | >90%     | 389 |
| catalysts                                 |                         |       |                  |             |          |     |
| Oxide                                     | 0.5M NaHCO <sub>3</sub> | 10 h  | -0.86 V vs. RHE  | -30 (pcd)   | 93 ± 2%  | 390 |
| containing Bi                             |                         |       |                  |             |          |     |
| nanosheets                                |                         |       |                  |             |          |     |
| Bi <sub>2</sub> S <sub>3</sub> derived Bi | 0.5M NaHCO <sub>3</sub> | 24 h  | -0.75 V vs. RHE  | -5          | 84%      | 386 |
| Bi nanotubes                              | 0.5M KHCO <sub>3</sub>  | 10 h  | -1.0 V vs. RHE   | -24         | ~95%     | 5   |
| Bi <sub>2</sub> O <sub>3</sub> derived    | 0.1M KHCO <sub>3</sub>  | 48 h  | -0.82V vs. RHE   | ~-36        | ~98-100% | 391 |
| nanotubes                                 |                         |       |                  |             |          |     |
| Bi <sub>2</sub> O <sub>3</sub>            | 0.1M KHCO <sub>3</sub>  | 12 h  | -0.956 V vs. RHE | ~-6         | ~76.3%   | 392 |
| NSs@MCCM                                  |                         |       |                  |             |          |     |
| Bi nanostructure                          | 0.5M KHCO <sub>3</sub>  | 30 h  | -0.9 V vs. RHE   | ~-13        | 90.74%   | 393 |
| Bi <sub>2</sub> O <sub>3</sub> -NGQDs     | 0.5M KHCO <sub>3</sub>  | 15 h  | -1.2 V vs. RHE   | -29.4 (pcd) | >90%     | 394 |
| Bi <sub>2</sub> O <sub>3</sub> /NCF       | 0.5M KHCO <sub>3</sub>  | 24 h  | -1.0 V vs. RHE   | m-15        | 94%      | 395 |
| f-Bi <sub>2</sub> O <sub>3</sub> /CNF     | 0.1 M KHCO <sub>3</sub> | -     | -1.2 V vs. RHE   | -20.9       | 87%      | 396 |
| Bi <sub>2</sub> O <sub>3</sub> @C-800     | 1M KOH(flow cell)       | 6 h   | -0.9 V vs. RHE   | ~-150       | >93%     | 397 |
| Bi <sub>2</sub> S <sub>3</sub> -          | 0.1M KHCO <sub>3</sub>  | 24 h  | -0.9 V vs. RHE   | m-3.5       | >90%     | 398 |
| Bi <sub>2</sub> O <sub>3</sub> @rGO       |                         |       |                  |             |          |     |
| Bi spheres                                | 0.5M KHCO <sub>3</sub>  | 24 h  | -0.9 V vs. RHE   | ~-8         | 91%      | 399 |
| Bi nanosheets                             | 0.5M KHCO <sub>3</sub>  | 17 h  | -0.97 V vs. RHE  | -25         | 92.5%    | 400 |
| Bismuthene@B                              | 0.5M KHCO <sub>3</sub>  | >75 h | -0.58 V vs. RHE  | m-16        | ~99%     | 401 |
| P                                         |                         |       |                  |             |          |     |
| Bi/rGO                                    | 0.1 M KHCO <sub>3</sub> | 15 h  | -0.8 V vs. RHE   | m-2         | 98%      | 402 |
| Bi/Gr                                     | 0.5M KHCO <sub>3</sub>  | 30 h  | -0.97 V vs. RHE  | m-20        | 92.1%    | 403 |
| Bi@NPC                                    | 0.1 M KHCO <sub>3</sub> | 20 h  | -1.5 V vs. SCE   | -14.4 (pcd) | 92%      | 404 |
| Cu                                        | 0.5M NaHCO <sub>3</sub> | 12 h  | -0.69 V vs. RHE  | ~-15 (pcd)  | 95%      | 405 |
| foam@BiNW                                 |                         |       |                  |             |          |     |
| CuBi                                      | 0.5M KHCO <sub>3</sub>  | 10 h  | -1.0 V vs. RHE   | m-20        | >80%     | 406 |

|                                              |                                                                              |       |                    |              |        |     |
|----------------------------------------------|------------------------------------------------------------------------------|-------|--------------------|--------------|--------|-----|
| Cu-Bi                                        | 0.5M NaHCO <sub>3</sub>                                                      | 6 h   | -0.93 V vs. RHE    | m-4.5        | 95%    | 407 |
| Ag-Bi-S-O                                    | 0.1 M KHCO <sub>3</sub>                                                      | 12 h  | -0.7 V vs. RHE     | -12.52 (pcd) | 94.3%  | 408 |
| decorated Bi                                 |                                                                              |       |                    |              |        |     |
| Bi decorated Sn nanosheets                   | 0.5M KHCO <sub>3</sub>                                                       | 100 h | -1.1 V vs. RHE     | m-55(pcd)    | 96%    | 362 |
| Bi doped SnO nanosheets                      | 0.1 M KHCO <sub>3</sub>                                                      |       | -1.7 V vs. Ag/AgCl | -12          | 93%    | 409 |
| Bi-MWCNT-COOH/Cu                             | 0.5 M KHCO <sub>3</sub>                                                      | 12 h  | -0.76 V vs. RHE    | -6~7         | 91.7%  | 410 |
| Bi(btb)                                      | 0.5 M KHCO <sub>3</sub>                                                      | 32 h  | -0.97 V vs. RHE    | -5.44        | 95.3%  | 411 |
| Pd <sub>70</sub> Pt <sub>30</sub> /C         | 0.1 M KH <sub>2</sub> PO <sub>4</sub> /0.1 M K <sub>2</sub> HPO <sub>4</sub> | -     | -0.4 V vs. RHE     | -5           | 88%    | 412 |
| branched Pd NPs                              | 0.5 M KHCO <sub>3</sub>                                                      | -     | -0.2 V vs. RHE     | -22          | 97%    | 413 |
| Pd interconnected nanosheets                 | 0.1 M NaCl                                                                   | -     | -0.31 V vs. RHE    | -15          | 89%    | 414 |
| Pd-B/C                                       | 0.1 M KHCO <sub>3</sub>                                                      | 5 h   | -0.5 V vs. RHE     | m-10         | 70%    | 415 |
| Pd@Au (10nm thick Pd shells)                 | 0.1 M Na <sub>2</sub> SO <sub>4</sub>                                        | -     | -0.5 V vs. RHE     | m-0.2        | 25%    | 416 |
| Pd/Cu <sub>2</sub> O-Cu NPs                  | 0.5 M NaHCO <sub>3</sub>                                                     | 3 h   | -0.25 V vs. RHE    | -4.2(pcd)    | 92%    | 417 |
| Co <sub>3</sub> O <sub>4</sub>               | 0.1 M KHCO <sub>3</sub>                                                      | 20 h  | -0.88 V vs. SCE    | -0.68        | 64.30% | 418 |
| CoO <sub>x</sub> /Co                         | 0.1 M Na <sub>2</sub> SO <sub>4</sub>                                        | 40 h  | -0.85 V vs. SCE    | -10.59       | 90.1%  | 419 |
| Vo-rich Co <sub>3</sub> O <sub>4</sub>       | 0.1 M KHCO <sub>3</sub>                                                      | 40 h  | -0.87 V vs. SCE    | -2.7         | 87.6%  | 420 |
| CoO <sub>x</sub> /ZrO <sub>2</sub> -graphite | 0.1 M KHCO <sub>3</sub>                                                      | 60 h  | -0.35 V vs. RHE    | -8.2         | 98.4%  | 421 |
| Dendritic foam                               | In 0.5 M KHCO <sub>3</sub>                                                   | -     | -0.86 V vs. SCE    | -5.8         | 86%    | 422 |

|                                             |                                                      |         |                               |             |           |     |
|---------------------------------------------|------------------------------------------------------|---------|-------------------------------|-------------|-----------|-----|
| 3D hierarchical porous In                   | 0.1 M KHCO <sub>3</sub>                              | 24 h    | -1.2 V vs. RHE                | -33         | ~90%      | 423 |
| O-InO <sub>x</sub>                          | 0.5 M NaHCO <sub>3</sub>                             | 20 h    | -0.8 V vs. RHE                | -7.8        | 90.2%     | 424 |
| S doped In                                  | 0.5 M KHCO <sub>3</sub>                              | 10 h    | -0.98 V vs. RHE               | m-60        | 93%       | 425 |
| Flowerlike In <sub>2</sub> S <sub>3</sub>   | ([Bmim][PF <sub>6</sub> ])/me<br>CN-H <sub>2</sub> O | 10 h    | -2.3 V vs. Ag/Ag <sup>+</sup> | -25.6(pcd)  | 86%       | 426 |
| In-In <sub>2</sub> S <sub>3</sub>           | 0.1 M KHCO <sub>3</sub>                              | 8 h     | -1.0 V vs. RHE                | m-51        | 76%       | 427 |
| In <sub>2</sub> O <sub>3</sub> -rGO         | 0.1 M KHCO <sub>3</sub>                              | 10 h    | -1.2 V vs. RHE                | m-22.5(pcd) | 84.6%     | 428 |
| In-TiO <sub>2</sub>                         | 0.1 M KCl                                            | -       | -1.6 V vs. SCE                | -           | 86%       | 429 |
| Sb nanosheets                               | 0.5 M NaHCO <sub>3</sub>                             | 12 h    | -1.06 V vs. RHE               | m -8        | ~84%      | 430 |
| Cu-Zn alloys                                | 0.1 M KHCO <sub>3</sub>                              | -       | -1.0 V vs. Ag/AgCl            | m-0.5       | 71.1%     | 431 |
| In-Sn alloy NPs                             | 0.1 M KHCO <sub>3</sub>                              | 12 h    | -1.1 V vs. SCE                | m-7         | 78.6%     | 432 |
| Sn <sub>56.3</sub> Pb <sub>43.7</sub>       | 0.5M KHCO <sub>3</sub>                               | 2 h     | -2.0 V vs. Ag/AgCl            | -45.7(pcd)  | 79.8%     | 433 |
| Cu-In(80 at% In)                            | 0.1 M KHCO <sub>3</sub>                              | -       | -1.0 V vs. RHE                | m-0.52(pcd) | 62%       | 434 |
| In(OH) <sub>3</sub> -Cu <sub>2</sub> O      | 0.1 M KHCO <sub>3</sub>                              | 12 h    | -0.8 V vs. RHE                | m-6.8(pcd)  | 90.37%    | 435 |
| In-Zn NCs                                   | 0.5M KHCO <sub>3</sub>                               | 2 h     | -1.2 V vs. RHE                | -22         | 95%       | 436 |
| Coralline Ag <sub>65</sub> Cu <sub>35</sub> | 0.1 M KHCO <sub>3</sub>                              | 10 h    | -1.0 V vs. RHE                | 18.3        | 91.8%     | 141 |
| Amorphous Cu NPs                            | 0.1 M KHCO <sub>3</sub>                              | 12 h    | -1.4 V vs. Ag/AgCl            | m-12        | 37%       | 437 |
| Cu fiber felt                               | 0.1 M KHCO <sub>3</sub>                              | 390 min | -1.1 V vs. RHE                | m-5         | 71.1±3.1% | 438 |
| Cu, Cd/Cu (300 nm)                          | 0.5 M KHCO <sub>3</sub>                              | 20000 s | -1.8 V vs. Ag/AgCl            | -10.6       | 76.2%     | 439 |
| S-modified Cu                               | 0.1 M KHCO <sub>3</sub>                              | -       | -0.8 V vs. RHE                | -28         | 80%       | 440 |
| CuS <sub>x</sub>                            | 0.1 M KHCO <sub>3</sub>                              | -       | -0.9 V vs. RHE                | -9          | 75%       | 441 |
| S-doped Cu <sub>2</sub> O-derived Cu        | 0.1 M KHCO <sub>3</sub>                              | 12 h    | -0.8 V vs. RHE                | m-11(pcd)   | ~75%      | 442 |
| S-doped Cu                                  | 0.1 M KHCO <sub>3</sub>                              | 12 h    | -0.9 V vs. RHE                | -12.3(pcd)  | 76.5%     | 443 |

|                          |                                             |        |                                 |            |       |     |
|--------------------------|---------------------------------------------|--------|---------------------------------|------------|-------|-----|
| based catalyst           |                                             |        |                                 |            |       |     |
| Cu <sub>2</sub> S        | 0.1 M NaHCO <sub>3</sub>                    | 9 h    | -0.9 V vs. RHE                  | -19.1(pcd) | 87.3% | 444 |
| MOF-derived              | [Bmim]PF <sub>6</sub> (0.5                  | -      | -1.85 V vs. Ag/Ag <sup>+</sup>  | -102.1     | 98.2% | 445 |
| Cu dendrites             | M)/MeCN/H <sub>2</sub> O(1                  |        |                                 |            |       |     |
|                          | M)                                          |        |                                 |            |       |     |
| Cu/Au                    | 0.5 M KHCO <sub>3</sub>                     | 4 h    | -0.6 V vs. RHE                  | -10.4(pcd) | 81%   | 446 |
| G-Cu <sub>x</sub> O-2h   | 0.5 M KHCO <sub>3</sub>                     | 9 h    | -0.8 V vs. RHE                  | -19.3      | 81%   | 447 |
| MoP@In-PC                | [Bmim]PF <sub>6</sub> (30                   | 6 h    | -2.2 V vs. Ag/Ag <sup>+</sup>   | -43.8      | 96.5% | 448 |
|                          | wt%)/MeCN/H <sub>2</sub> O(                 |        |                                 |            |       |     |
|                          | 5 wt%)                                      |        |                                 |            |       |     |
| Dendritic                | Cu [Bimim]BF <sub>6</sub> /H <sub>2</sub> O | -      | -1.55 V vs. Fc <sup>+</sup> /Fc | -6.5       | 83%   | 449 |
| foam                     | (8wt%)                                      |        |                                 |            |       |     |
| Cu foam(60 s)            | 0.5 M NaHCO <sub>3</sub>                    | -      | -1.5 V vs. Ag/AgCl              | -10        | 37%   | 450 |
| Cu <sub>x</sub> O/Cu     | 0.5 M KHCO <sub>3</sub>                     | 20 h   | -1.1 V vs. SCE                  | -10        | ~62%  | 451 |
| Cu nanoflower            | 0.1 M KHCO <sub>3</sub>                     | 9 h    | -1.0 V vs. RHE                  | -21        | 26%   | 452 |
| Cu <sub>2</sub> O/Cu@NC- | 1 M KHCO <sub>3</sub>                       | 30 h   | -0.68 V vs. RHE                 | -4.4       | 70.5% | 453 |
| 800                      |                                             |        |                                 |            |       |     |
| CuO STNW                 | 0.5 M KHCO <sub>3</sub>                     | 7200 s | -1.2 V vs. Ag/AgCl              | -6         | m55%  | 454 |
| (7nm)Cu/p-NG             | 0.5 M KHCO <sub>3</sub>                     | 12 h   | -0.90 V vs. RHE                 | -7.7A/g    | 65%   | 455 |
| Pt-                      | 0.1 M KHCO <sub>3</sub>                     | 30 h   | -0.50 V vs. RHE                 | -40        | 91%   | 456 |
| NPs@NCNFs@               |                                             |        |                                 |            |       |     |
| CC                       |                                             |        |                                 |            |       |     |
| HNCM/CNT                 | 0.1 M KHCO <sub>3</sub>                     | 35 h   | -0.80 V vs. RHE                 | m-2.15     | 81%   | 457 |
| PEI-NCNT                 | 0.1 M KHCO <sub>3</sub>                     | 24 h   | -1.8 V vs. SCE                  | -7.2       | 85%   | 458 |
| Nitrogen-doped           | 0.5 M KHCO <sub>3</sub>                     | 12 h   | -0.84 V vs. RHE                 | -7.5       | 73%   | 459 |
| graphenes                |                                             |        |                                 |            |       |     |
| Boron-doped              | 0.1 M KHCO <sub>3</sub>                     | -      | -1.4 V vs. SCE                  | m-2.25     | 66%   | 460 |
| graphene                 |                                             |        |                                 |            |       |     |
| Boron-doped              | 0.5 M KCl                                   | 24 h   | m-2.3 V vs. Ag/AgCl             | -2         | 94.7% | 461 |



---

|                |                         |      |                |                       |       |     |
|----------------|-------------------------|------|----------------|-----------------------|-------|-----|
| diamond (BDD)  |                         |      |                |                       |       |     |
| BCN-40         | 0.1 M KHCO <sub>3</sub> | -    | -0.3 V vs. RHE | <sup>m</sup> -0.36    | 83.5% | 462 |
| N-C61-800      | 0.5 M KHCO <sub>3</sub> |      | -0.9 V vs. RHE | <sup>m</sup> -11(pcd) | 91.2% | 463 |
| Activated wood | 0.5 M KHCO <sub>3</sub> | 24 h | -1.8 V vs. SCE | -53.8                 | 70.8% | 464 |

---

**Table 9.** CO<sub>2</sub>RR performance over materials with alcohols as the main product

| Catalysts                                 | Electrolyte                                                | Durability | Potential                                  | Current                      |    | Products           | FE     | Reference |
|-------------------------------------------|------------------------------------------------------------|------------|--------------------------------------------|------------------------------|----|--------------------|--------|-----------|
|                                           |                                                            |            |                                            | density/<br>cm <sup>-2</sup> | mA |                    |        |           |
| Mo electrode                              | 0.2 M Na <sub>2</sub> SO <sub>4</sub>                      | -          | -0.8 V vs. SCE                             | -0.12                        |    | CH <sub>3</sub> OH | 84%    | 465       |
| RuO <sub>2</sub> +TiO <sub>2</sub>        | 0.05 M H <sub>2</sub> SO <sub>4</sub>                      | -          | -0.9 V vs. Hg <sub>2</sub> SO <sub>4</sub> | -0.52                        |    | CH <sub>3</sub> OH | 24%    | 466       |
| (35+65 m/o)                               |                                                            |            |                                            |                              |    |                    |        |           |
| Ru                                        | 0.5 M NaHCO <sub>3</sub>                                   | 8 h        | -0.8 V vs. SCE                             | <sup>m</sup> -0.055          |    | CH <sub>3</sub> OH | 17.2   | 467       |
| Cu atom modified Ru                       | 0.5 M NaHCO <sub>3</sub>                                   | 8 h        | -0.8 V vs. SCE                             | <sup>m</sup> -0.045          |    | CH <sub>3</sub> OH | 41.3%  | 344       |
| Cu <sub>2</sub> O                         | 0.5 M KHCO <sub>3</sub>                                    | -          | -1.1 V vs. SCE                             | -                            |    | CH <sub>3</sub> OH | 38%    | 468       |
| 20% Cu (3-60 nm)/CNT                      | 0.5 M NaHCO <sub>3</sub>                                   | 6000 s     | -1.7 V vs. SCE                             | <sup>m</sup> -16             |    | CH <sub>3</sub> OH | 38.5%  | 469       |
| Cd atom modified Ru                       | 0.5 M NaHCO <sub>3</sub>                                   | 8 h        | -0.8 V vs. SCE                             | <sup>m</sup> -0.05           |    | CH <sub>3</sub> OH | 38.2%  | 344       |
| RuO <sub>2</sub> /B-doped diamond         | 0.4 M Britton-Robinson solution                            | -          | -0.8 V vs. SCE                             | <sup>m</sup> -0.65           |    | CH <sub>3</sub> OH | 8.12%  | 470       |
| [PYD]@Cu-Pt                               | 0.5 KCl                                                    | 22 h       | -0.6 V vs. SCE                             | -22                          |    | CH <sub>3</sub> OH | 37%    | 471       |
| V-doped NCs                               | In <sub>2</sub> O <sub>3</sub> 0.1 M KHCO <sub>3</sub>     |            | -0.83 V vs. RHE                            | <sup>m</sup> -2              |    | CH <sub>3</sub> OH | 15.8%  | 472       |
| RuO <sub>2</sub> /TiO <sub>2</sub> NTs/Pt | 0.5 M NaHCO <sub>3</sub>                                   | -          | -0.8 V vs. SCE                             | <sup>m</sup> -1.05           |    | CH <sub>3</sub> OH | 60.50% | 473       |
| RuO <sub>2</sub> /TiO <sub>2</sub> NPs/Pt | 0.5 M NaHCO <sub>3</sub>                                   | -          | -0.8 V vs. SCE                             | -0.45                        |    | CH <sub>3</sub> OH | 40.20% | 345       |
| [PYD]@Pd                                  | 0.5 M KCl                                                  | 15 h       | -0.6 V vs. SCE                             | <sup>m</sup> -30             |    | CH <sub>3</sub> OH | 35%    | 474       |
| Pd-Cu bimetallic aerogel                  | 25 mol% [Bimim]BF <sub>6</sub> / 75 mol % H <sub>2</sub> O | 24 h       | -2.1 V vs. Ag/Ag <sup>+</sup>              | <sup>m</sup> -31.8           |    | CH <sub>3</sub> OH | 80.0%  | 475       |
| Mo-Bi BMC/CP                              | 0.5 M                                                      | 5 h        | -0.7 V vs. SHE                             | -12.1                        |    | CH <sub>3</sub> OH | 71.2%  | 476       |

|                                            |                                                                    |       |                               |            |                                  |         |     |
|--------------------------------------------|--------------------------------------------------------------------|-------|-------------------------------|------------|----------------------------------|---------|-----|
|                                            | [Bimim]BF <sub>6</sub> /                                           |       |                               |            |                                  |         |     |
|                                            | MeCN                                                               |       |                               |            |                                  |         |     |
| Cu <sub>2</sub> O <sub>(OL-MH)</sub> /Ppy  | 0.5 M KHCO <sub>3</sub>                                            | 15 h  | -0.85 V vs. RHE               | m-0.14     | CH <sub>3</sub> OH               | 93±1.2% | 477 |
| LT paper                                   |                                                                    |       |                               |            |                                  |         |     |
| Cu <sub>1.63</sub> Se(1/3)                 | [Bimim]PF <sub>6</sub> (30wt<br>%)/MeCN/H <sub>2</sub> O(5<br>wt%) |       | -2.1 V vs. Ag/Ag <sup>+</sup> | -41.5      | CH <sub>3</sub> OH               | 77.6%   | 478 |
| 2-<br>pyridinethiol@Pt<br>-Au NPs          | 0.1 M KNO <sub>3</sub>                                             | 20 h  | -0.2 V vs. Ag/AgCl            | -          | CH <sub>3</sub> OH               | 39%     | 479 |
| PD-Zn/Ag                                   | 0.1 M KHCO <sub>3</sub>                                            | -     | ~-1.4 V vs. RHE               | -2.7(pcd)  | CH <sub>3</sub> OH               | 10.5%   | 480 |
| FeP NA/TM                                  | 0.5 M KHCO <sub>3</sub>                                            | 36 h  | -0.2 V vs. RHE                | m-1.5      | CH <sub>3</sub> OH               | 80.2%   | 481 |
| PD-Zn/Ag foam                              | 0.1 M KHCO <sub>3</sub>                                            | 8 h   | -1.38 V vs. RHE               | -2.1(pcd)  | CH <sub>3</sub> OH               | 8.1%    | 481 |
| Pt <sub>x</sub> Zn/C                       | 0.1 M NaHCO <sub>3</sub>                                           | 16 h  | -0.9 V vs. RHE                | m-0.4      | CH <sub>3</sub> OH               | 81.4%   | 482 |
| Cu <sub>63.9</sub> Au <sub>36.1</sub> /NCF | 0.5 M KHCO <sub>3</sub>                                            | -     | -1.1 V vs. SCE                | m-0.025    | CH <sub>3</sub> OH               | 15.90%  | 483 |
| CoPc-NH <sub>2</sub> /CNT                  | 0.1 M KHCO <sub>3</sub>                                            | 12 h  | -1.0 V vs. RHE                | -10.2(pcd) | CH <sub>3</sub> OH               | 32%     | 484 |
| BP NPs                                     | 0.1 M KHCO <sub>3</sub>                                            | 18 h  | -0.5 V vs. RHE                | m-0.16     | CH <sub>3</sub> OH               | 92%     | 485 |
| Cu <sub>0.8ML</sub> /THH Pd<br>NCs         | 0.1 M NaHCO <sub>3</sub>                                           | -     | -0.46 V vs. RHE               | m-0.08     | CH <sub>3</sub> OH               | 19.50%  | 486 |
| CuSAs/TCNFs                                | 0.1 M KHCO <sub>3</sub>                                            | 50 h  | -0.9 V vs. RHE                | m-41(pcd)  | CH <sub>3</sub> OH               | 44%     | 487 |
| Cu/TiO <sub>2</sub> /NG                    | 0.2 M KI                                                           | 20 h  | -0.75V vs. RHE                | -0.625     | C <sub>2</sub> H <sub>5</sub> OH | 43.6%   | 488 |
| c-NC                                       | 0.1 M KHCO <sub>3</sub>                                            | 24 h  | -0.56 V vs. RHE               | m-1.0      | C <sub>2</sub> H <sub>5</sub> OH | 77%     | 489 |
| BND3                                       | 0.1 M NaHCO <sub>3</sub>                                           | 48 h  | -1.0 V vs. RHE                | m-0.7      | C <sub>2</sub> H <sub>5</sub> OH | 93.20%  | 490 |
| Ag-G-NCF                                   | 0.1 M KHCO <sub>3</sub>                                            | 10 h  | -0.6 V vs. RHE                | m-0.1      | C <sub>2</sub> H <sub>5</sub> OH | 85.2%   | 491 |
| phase-blended<br>Ag-Cu <sub>2</sub> O      | 0.2 M KCl                                                          | -     | -1.2 V vs. RHE                | m-3.0      | C <sub>2</sub> H <sub>5</sub> OH | 34.15%  | 492 |
| OD-Ag <sub>15</sub> Cu <sub>85</sub>       | 0.5 M KHCO <sub>3</sub>                                            | 100 h | -1.0 V vs. RHE                | -8.67(pcd) | C <sub>2</sub> H <sub>5</sub> OH | 33.7%   | 493 |
| Foam                                       |                                                                    |       |                               |            |                                  |         |     |
| Cu electrode                               | 0.1 M KCl                                                          | -     | -1.44 V vs. NHE               | -5         | C <sub>2</sub> H <sub>5</sub> OH | 21.9%   | 494 |

|                               |    |                                      |       |                     |                                      |                                  |        |     |
|-------------------------------|----|--------------------------------------|-------|---------------------|--------------------------------------|----------------------------------|--------|-----|
| Amorphous                     | Cu | 0.1 M KHCO <sub>3</sub>              | 12 h  | -1.4 V vs. Ag/AgCl  | m-12                                 | C <sub>2</sub> H <sub>5</sub> OH | 22%    | 437 |
| NPs                           |    |                                      |       |                     |                                      |                                  |        |     |
| CuO-FC                        |    | 1 M KOH(flow cell)                   | -     | -1.0 V vs. RHE      | -127.2                               | C <sub>2</sub> H <sub>5</sub> OH | 35.7%  | 495 |
| Cu <sub>4</sub> Zn            |    | 0.1 M KHCO <sub>3</sub>              | 5 h   | -1.05 V vs. RHE     | -8.2(pcd)                            | C <sub>2</sub> H <sub>5</sub> OH | 29.1%  | 496 |
| Ag/Cu                         |    | 1 M KOH(flow cell)                   | -     | -0.67 V vs. RHE     | -250                                 | C <sub>2</sub> H <sub>5</sub> OH | 41%    | 497 |
| Ce(OH) <sub>x</sub> -doped-Cu |    | 1 M KOH(flow cell)                   | 6 h   | -0.7 V vs. RHE      | -128(pcd)                            | C <sub>2</sub> H <sub>5</sub> OH | 43%    | 498 |
| Cu/NPC-800                    |    | 0.2 M KHCO <sub>3</sub>              | 10 h  | -1.05 V vs. RHE     | m-6(pcd)                             | C <sub>2</sub> H <sub>5</sub> OH | 64.6%  | 499 |
| Cu GNC-VL                     |    | 0.5 M KHCO <sub>3</sub>              | 12 h  | -0.87 V vs. RHE     | -10.4                                | C <sub>2</sub> H <sub>5</sub> OH | 70.52% | 500 |
| GO-VB6-Cu                     |    | 0.1 M KHCO <sub>3</sub>              | 24 h  | -0.25 V vs. RHE     | -4.571                               | C <sub>2</sub> H <sub>5</sub> OH | 56.3%  | 501 |
| N-C/Cu                        |    | 1 M KOH                              | 15 h  | -3.67 V             | -(156±3)(pcd)                        | C <sub>2</sub> H <sub>5</sub> OH | 52±1%  | 502 |
| N-NC/Cu                       |    | 0.5 M KHCO <sub>3</sub>              | 120 h | -0.5 V vs. RHE      | 84.9 A g <sub>Cu</sub> <sup>-1</sup> | C <sub>2</sub> H <sub>5</sub> OH | 28.9%  | 503 |
| Ni <sub>2</sub> Al film       |    | 0.1 M K <sub>2</sub> SO <sub>4</sub> | 4-5 d | -1.38 V vs. Ag/AgCl | -2.1                                 | n-propanol                       | 1.9%   | 504 |
| Cu electrode                  |    | 0.1 M KCl                            | -     | -1.44 V vs. NHE     | -5                                   | n-propanol                       | 3.6%   | 494 |
| Cu electrode                  |    | 0.1 M KClO <sub>4</sub>              | -     | -1.40 V vs. NHE     | -5                                   | n-propanol                       | 4.2%   | 494 |
| Cu nanocrystal                |    | 0.1 M KHCO <sub>3</sub>              | 6h    | -0.95 V vs. RHE     | -1.74pcd                             | n-propanol                       | 8.8%   | 505 |
| Plasma-oxidized               |    | 0.3 M KI +0.1 M                      | -     | -1.0 V vs. RHE      | m-59                                 | n-propanol                       | 7%     | 506 |
| Cu                            |    | KHCO <sub>3</sub>                    |       |                     |                                      |                                  |        |     |

**Table 10.** CO<sub>2</sub>RR performance on Cu related materials with hydrocarbons as the main products

| Catalyst                                                 | Electrolyte                                                         | Durability | Potential          | Current                                           | FE/CH <sub>4</sub> | FE/C <sub>2</sub> H <sub>4</sub> | FE/C <sub>2</sub> H <sub>6</sub> |
|----------------------------------------------------------|---------------------------------------------------------------------|------------|--------------------|---------------------------------------------------|--------------------|----------------------------------|----------------------------------|
|                                                          |                                                                     | test       |                    | density/ mA                                       |                    |                                  |                                  |
|                                                          |                                                                     |            |                    | cm <sup>-2</sup>                                  |                    |                                  |                                  |
| Cold-rolled Cu <sup>507</sup><br>(99.9%)                 | 0.5 M KHCO <sub>3</sub>                                             | -          | -2.29 V vs. SCE    | -38                                               | 33%                | -                                | -                                |
| In situ deposited<br>Cu <sup>508</sup>                   | 0.5 M KHCO <sub>4</sub> +<br>5×10 <sup>-4</sup> M CuSO <sub>4</sub> | -          | -                  | -8.3                                              | 73%                | 25%                              | -                                |
| Cu electrode <sup>494</sup>                              | 0.1 M KHCO <sub>3</sub>                                             | -          | -1.41 V vs. NHE    | -5                                                | 29.4%              | 30.1%                            | -                                |
| Cu electrode <sup>494</sup>                              | 0.1 M KCl                                                           | -          | -1.44 V vs. NHE    | -5                                                | 11.5%              | 47.8%                            | -                                |
| Cu(100) <sup>509</sup>                                   | 0.1 M KHCO <sub>3</sub>                                             | -          | -1.39V vs. SHE     | -5                                                | CE:<br>19.8%       | 40.7%                            | -                                |
| Cu(100) <sup>510</sup>                                   | 0.1 M KHCO <sub>3</sub>                                             | -          | -1.4 V vs. SHE     | -5                                                | CE:<br>30.4%       | 40.4%                            | -                                |
| Electropolished<br>Cu surface <sup>511</sup>             | 0.1 M KClO <sub>4</sub>                                             | -          | -1.1 V vs. RHE     | -                                                 | 5%                 | 14%                              | -                                |
| Cu <sub>2</sub> O-derived Cu<br>electrode <sup>512</sup> | 0.1 M KHCO <sub>3</sub>                                             | -          | -0.98 V vs. RHE    | m-10pcd                                           |                    | 32.4%                            |                                  |
| Oxide-derived<br>Cu <sup>513</sup>                       | 0.1 M KHCO <sub>3</sub>                                             | 5 h        | -1.0 V vs. RHE     | -10.9                                             |                    | 34%                              |                                  |
| Cu foil <sup>514</sup>                                   | 0.3 KI + 0.1 M<br>KHCO <sub>3</sub>                                 | -          | -1.0 V vs. RHE     | m-12                                              | m58%               | m22%                             | -                                |
| Polycrystalline<br>Cu <sup>515</sup>                     | 0.1 M KHCO <sub>3</sub>                                             | -          | m-1.41 V vs. NHE   | m-14.5                                            | m70%               | m15%                             | -                                |
| CuCl-confined<br>Cu <sup>516</sup>                       | 4 M KCl                                                             | -          | -1.8 V vs. Ag/AgCl | -(16.9~13.6)                                      | -                  | 69.5%                            | -                                |
| CuCl derived<br>Cu <sup>517</sup>                        | 0.1 M KHCO <sub>3</sub>                                             | -          | -1.06 V vs. RHE    | -14.8 (pcd<br>for C <sub>2</sub> H <sub>4</sub> ) |                    | 37%                              | -                                |
| CuBr-confined                                            | 3 M KBr                                                             | -          | -2.4 V vs. Ag/AgCl | -(46.1~39.2)                                      | -                  | 79.5%                            | -                                |

|                                     |                            |                          |                    |                                     |        |       |         |   |
|-------------------------------------|----------------------------|--------------------------|--------------------|-------------------------------------|--------|-------|---------|---|
| Cu                                  | mesh                       |                          |                    |                                     |        |       |         |   |
|                                     | electrode <sup>518</sup>   |                          |                    |                                     |        |       |         |   |
| Glycine-                            | 0.1 M KHCO <sub>3</sub>    | -                        | -1.9 V vs. Ag/AgCl | -2.1(pcd)                           | 32.1%  | 24.0% | -       |   |
| modified                            | Cu                         |                          |                    |                                     |        |       |         |   |
|                                     | foil <sup>519</sup>        |                          |                    |                                     |        |       |         |   |
| Hydrophobic                         | Cu                         | 0.1 M CsHCO <sub>3</sub> | 5 h                | -1.1~-1.5 V vs. RHE                 | -30    | -     | 56%     | - |
|                                     | dendrites <sup>520</sup>   |                          |                    |                                     |        |       |         |   |
| Truncated-                          | 0.5 M KHCO <sub>3</sub>    | 2 h                      | -1.1 V vs. RHE     | -23.1(pcd)                          | -      | 59%   | -       |   |
|                                     | octahedral                 | Cu <sub>2</sub> O        |                    |                                     |        |       |         |   |
|                                     | NPs <sup>521</sup>         |                          |                    |                                     |        |       |         |   |
| MOF-derived                         | Cu                         | 1 M KOH                  | -                  | -1.07 V vs. RHE                     | -269   |       | 45%     |   |
|                                     | clusters <sup>522</sup>    |                          |                    |                                     |        |       |         |   |
| B-doped                             | Cu <sup>523</sup>          | 0.1 M KCl                | 40 h               | -1.0 V vs. RHE                      | -70    |       | 53 ± 1% |   |
| OFn-Cu <sup>524</sup>               | 1 M KHCO <sub>3</sub>      |                          |                    | -1.05 V vs. RHE                     | -36.24 | 60.6% | -       | - |
| Cu <sub>2</sub> O@Cu-               | 0.1 M KHCO <sub>3</sub>    | 1 h                      | -1.71 V vs. RHE    | -8.4(pcd)                           | 63.2%  | -     | -       |   |
|                                     | MOF <sup>525</sup>         |                          |                    |                                     |        |       |         |   |
| Cu <sub>2</sub> O/Cu <sup>526</sup> | 0.1 M KHCO <sub>3</sub>    | 24 h                     | -0.9 V vs. RHE     | -26.2                               | -      | m20%  | m30%    |   |
| Cu-Ag <sup>527</sup>                | 0.1 M KHCO <sub>3</sub>    | 12 h                     | -1.05 V vs. RHE    | -18.07 (pcd                         | -      | 52%   | -       |   |
|                                     |                            |                          |                    | for C <sub>2</sub> H <sub>4</sub> ) |        |       |         |   |
| Cu                                  | oxide/ZnO                  | 0.1 M KHCO <sub>3</sub>  | -                  | -2.5 V vs. Ag/AgCl                  | -7.5   | -     | 91.1%   | - |
|                                     | GDE <sup>528</sup>         |                          |                    |                                     |        |       |         |   |
| Hydroxide-                          | 10 M KOH                   | 150 h                    | -0.55 V vs. RHE    | -275                                |        | 70%   |         |   |
|                                     | mediated Cu <sup>529</sup> |                          |                    |                                     |        |       |         |   |
| Cu <sub>2</sub> O <sup>530</sup>    | 0.5 M KHCO <sub>3</sub>    | 2 h                      | -1.9 V vs. Ag/AgCl | -10                                 |        | 22%   |         |   |
| Coral-like                          | Cu                         | 0.1 M KHCO <sub>3</sub>  | 15 h               | -1.1 V vs. RHE                      | -25.2  | -     | m45%    | - |
|                                     | NPs <sup>531</sup>         |                          |                    |                                     |        |       |         |   |
| O <sub>2</sub>                      | plasma                     | 0.1 M KHCO <sub>3</sub>  | -                  | -0.9 V vs. RHE                      | m-14   |       | 60%     |   |
|                                     | oxidized Cu <sup>532</sup> |                          |                    |                                     |        |       |         |   |
| [110]                               | oriented                   | 0.1 M KHCO <sub>3</sub>  | 5 h                | -1.1 V vs. RHE                      | m-12.5 | -     | m32.5%  | - |

|                                                               |                                      |         |                 |               |        |           |   |
|---------------------------------------------------------------|--------------------------------------|---------|-----------------|---------------|--------|-----------|---|
| Cu <sub>2</sub> O-derived nanoparticles <sup>533</sup>        |                                      |         |                 |               |        |           |   |
| Multihollow Cu <sub>2</sub> O <sup>534</sup>                  | 2 M KOH (flow cell)                  | 3 h     | -0.61 V vs. RHE | m-360         | -      | 38±1.4%   | - |
| Multi-shelled CuO microboxes <sup>535</sup>                   | 0.1 M K <sub>2</sub> SO <sub>4</sub> | 10 h    | -1.05 V vs. RHE | -27.7         | -      | 51.3%     | - |
| Cu particles supported on glassy carbon n-Cu/C <sup>536</sup> | 0.1 M NaHCO <sub>3</sub>             | -       | -1.35 V vs. RHE | m-9.5         | 76%    | -         | - |
| Cu catalysts <sup>537</sup>                                   | 1 M KHCO <sub>3</sub> (flow cell)    | 22 h    | m-1.0 V vs. RHE | -108 ± 5(pcd) | 48 ± 2 | -         | - |
| 44 nm Cu NCs <sup>538</sup>                                   | 0.1 M KHCO <sub>3</sub>              | -       | -1.1 V vs. RHE  | m-5.6         | -      | 41%       | - |
| Cu nanocubes (70 nm) <sup>539</sup>                           | 10 M KOH (flow cell)                 | 3 h     | -0.8 V vs. RHE  | 144(pcd)      | -      | 60%       | - |
| Cu cubes <sup>540</sup>                                       | 1 M KOH (flow cell)                  | -       | -0.75 V vs. RHE | -300          | -      | 57%       | - |
| Densily packed Cu NPs <sup>541</sup>                          | 0.1 M KHCO <sub>3</sub>              | 10 h    | -0.73 V vs. RHE | m-20          | -      | m26%      | - |
| Prism shaped Cu <sup>542</sup>                                | 0.1 M KHCO <sub>3</sub>              | 12h     | -1.1 V vs. RHE  | -28.6         | -      | 27.8%     | - |
| Cu NPs/N-doped carbon frameworks <sup>543</sup>               | 0.1 M KHCO <sub>3</sub>              | 24 h    | -1.0 V vs. RHE  | m-50          | -      | 63.7±1.4% | - |
| Cu <sub>2</sub> O/NCS <sup>544</sup>                          | 0.1 M KHCO <sub>3</sub>              | 4 h     | -1.3 V vs. RHE  | m-10          | -      | 24.7%     | - |
| Cu <sub>2</sub> O/NRGO <sup>545</sup>                         | 0.1 M KHCO <sub>3</sub>              | 10000 s | -1.4 V vs. RHE  | -12           | -      | 19.7%     | - |
| Cu <sub>2</sub> O/ILGS-100 <sup>546</sup>                     | 0.1 M KHCO <sub>3</sub>              | 6000 s  | -1.15 V vs. RHE | m-12          | -      | 31.1%     | - |

|                                               |                                                              |        |                    |                              |                   |                      |                       |
|-----------------------------------------------|--------------------------------------------------------------|--------|--------------------|------------------------------|-------------------|----------------------|-----------------------|
| Cu <sub>2</sub> O NP/C <sup>547</sup>         | 0.1 M KHCO <sub>3</sub>                                      | 6 h    | -1.1 V vs. RHE     | <sup>m</sup> -17.5           | 1.9%              | 57.3%                | -                     |
| Cu-N-C-900 <sup>548</sup>                     | 0.1 M KHCO <sub>3</sub>                                      | 10 h   | -1.6 V vs. RHE     | -14.8(pcd)                   | 38.6%             | -                    | -                     |
| P-ED-Cu <sup>549</sup>                        | 0.5 M NaHCO <sub>3</sub>                                     | 2.5 h  | -2.8 V vs. SCE     | -38(pcd)                     | 85%               |                      |                       |
| Cu(2)GO/GC <sup>550</sup>                     | 0.1 M NaHCO <sub>3</sub>                                     | 2 h    | -1.3 V vs. RHE     | -4.6                         | 43.6%             |                      |                       |
| Pd@Cu NCs <sup>551</sup>                      | 0.25 K <sub>2</sub> CO <sub>3</sub>                          | 4000 s | -1.4 V vs. Ag/AgCl | -14.2                        | <sup>m</sup> 45%  | <sup>m</sup> 6%      |                       |
| Pd@Cu NCs <sup>551</sup>                      | 0.25 K <sub>2</sub> CO <sub>3</sub>                          | 4000 s | -1.4 V vs. Ag/AgCl | -33.6                        | <sup>m</sup> 58%  | <sup>m</sup> 16%     |                       |
| Glycine-<br>modified Cu<br>NWs <sup>519</sup> | 0.1 M KHCO <sub>3</sub>                                      | 14 h   | -1.9 V vs. Ag/AgCl | -11                          |                   | 6.7%                 | 13%                   |
| CTF-Cu-4.8%                                   | 0.3 M KCl                                                    | 10 h   | -1.51 V vs. SHE    | -44.5 mA<br>mg <sup>-1</sup> | <sup>m</sup> 60%  | <sup>m</sup> 20%     | -                     |
| Polycrystalline<br>Cu <sup>552</sup>          | 0.1 M KHCO <sub>3</sub> +10<br>mM N-aryl<br>pyridinium salt) | 43 h   | -1.15 V vs. RHE    | -6.4                         | -                 | 40%                  | -                     |
| Cu NWs <sup>553</sup>                         | 0.1 M KHCO <sub>3</sub>                                      | 6 h    | -1.3 V vs. RHE     | <sup>m</sup> -12.5           | <sup>m</sup> 6.2% | 12%                  |                       |
| Cu NNs                                        | 0.1 M KHCO <sub>3</sub>                                      | 6 h    | -1.2 V vs. RHE     | <sup>m</sup> -17             | 14.3%             | <sup>m</sup> 6%      |                       |
| Cu-DAT wire <sup>554</sup>                    | 1 M KOH(flow<br>cell)                                        | -      | -0.5 V vs. RHE     | <sup>m</sup> -124            | -                 | 40%                  |                       |
| Cu-Ag alloy<br>DAT wire <sup>555</sup>        | 1 M KOH(flow<br>cell)                                        | -      | -0.7 V vs. RHE     | -300                         |                   | 60%                  |                       |
| CuSn-DAT <sup>556</sup>                       | 1 M KOH(flow<br>cell)                                        | -      | -0.8 V vs. RHE     | -225                         | -                 | 40%                  |                       |
| Ag/Cu <sup>557</sup>                          | 0.1 M KHCO <sub>3</sub>                                      | 30 h   | -1.1 V vs. RHE     | -5.9                         | -                 | 42%                  | -                     |
| Anodized Cu <sup>558</sup>                    | 0.1 M KHCO <sub>3</sub>                                      | 40 h   | -1.08 V vs. RHE    | <sup>m</sup> -7.3 (pcd)      |                   | 38.1%                |                       |
| Dendritic Cu <sup>559</sup>                   | 0.1 M KBr                                                    | 2.5 h  | -1.9 V vs. Ag/AgCl | -170                         | -                 | 57%                  |                       |
| Honeycomb<br>Cu(VII) <sup>560</sup>           | 0.1 M KHCO <sub>3</sub>                                      | -      | -1.9 V vs. Ag/AgCl | -                            | -                 | CE. <sup>m</sup> 12% | CE. <sup>m</sup> 2.5% |
| Oxide-derived<br>foam Cu <sup>561</sup>       | 0.5 M KHCO <sub>3</sub>                                      | -      | -0.9 V vs. RHE     | <sup>m</sup> -23             | -                 | <sup>m</sup> 15%     | <sup>m</sup> 40%      |



|                                                                                |                                       |        |                    |                                                                                                                                 |       |                    |       |
|--------------------------------------------------------------------------------|---------------------------------------|--------|--------------------|---------------------------------------------------------------------------------------------------------------------------------|-------|--------------------|-------|
| mesopore Cu <sup>562</sup>                                                     | 0.1 M KHCO <sub>3</sub>               | -      | -1.7V vs.NHE       | -14.3                                                                                                                           | -     | -                  | 46%   |
| CuO-derived Cu NRAs <sup>563</sup>                                             | 0.1 M KHCO <sub>3</sub>               | 5400 s | -0.816 V vs. RHE   | <sup>m</sup> -12.5                                                                                                              | -     | 23%                | 7%    |
| Nanopore modified Cu <sup>564</sup>                                            | 0.1 M KHCO <sub>3</sub>               | 8 h    | -1.3 V vs. RHE     | -45                                                                                                                             | -     | 35%                | -     |
| Plasma-oxidized Cu <sup>506</sup>                                              | 0.3 KI + 0.1 M KHCO <sub>3</sub>      | -      | -1.0 V vs. RHE     | <sup>m</sup> -59                                                                                                                | -     | 47.6%              | -     |
| Cu <sub>2</sub> O <sup>565</sup>                                               | 0.1 M KHCO <sub>3</sub>               | -      | -0.99 V vs. RHE    | -35                                                                                                                             | -     | 34.26%             | -     |
| Cu <sub>2</sub> (OH) <sub>3</sub> Cl <sup>566</sup>                            | 0.1 M KHCO <sub>3</sub>               | -      | -1.2 V vs. RHE     | -22(pcd)<br>(C <sub>2</sub> H <sub>4</sub> )                                                                                    | -     | 38%                | -     |
| Cu based catalyst with Cu <sub>4</sub> O <sub>3</sub> particles <sup>567</sup> | 0.5 M Cs <sub>2</sub> SO <sub>4</sub> | 24 h   | -0.64 V vs. RHE    | -300                                                                                                                            | -     | 43%                | -     |
| CuCl-based electrode <sup>517</sup>                                            | 0.1 M KHCO <sub>3</sub>               | 6 h    | -1.06 V vs. RHE    | -14.8(pcd)<br>(C <sub>2</sub> H <sub>4</sub> )                                                                                  | -     | 37%                | -     |
| Cu-on Cu <sub>3</sub> N <sup>246</sup>                                         | 0.1 M KHCO <sub>3</sub>               | 30 h   | -0.95 V vs. RHE    | -14(pcd) for<br>C <sub>2</sub> H <sub>4</sub> ,<br>C <sub>2</sub> H <sub>5</sub> OH,<br>and<br>C <sub>3</sub> H <sub>7</sub> OH | -     | 39±2%              | -     |
| Cu <sub>3</sub> N NCs <sup>568</sup>                                           | 0.1 M KHCO <sub>3</sub>               | 20 h   | -1.6 V vs. RHE     | -34 A/g                                                                                                                         | -     | 60%                | -     |
| Cu <sub>3</sub> N-derived Cu <sup>569</sup>                                    | 0.1 M CsHCO <sub>3</sub>              | -      | -1.0 V vs. RHE     | ~18.5                                                                                                                           | -     | 33%                | ~20%  |
| Cu <sub>3</sub> Pd <sup>94</sup>                                               | 0.1 M KHCO <sub>3</sub>               | -      | -1.2 V vs. RHE     | -3.8(pcd)                                                                                                                       | 40.6% | -                  | -     |
| PdCl/Cu <sub>2</sub> O-Derived Cu <sup>570</sup>                               | 0.1 M KHCO <sub>3</sub>               | 12 h   | -1.0 V vs. RHE     | <sup>m</sup> -17                                                                                                                | -     | 3.4%               | 30.1% |
| 3MLCu/ZnO <sup>571</sup>                                                       | 0.1 M KHCO <sub>3</sub>               | -      | -1.4 V vs. Ag/AgCl | <sup>m</sup> -12                                                                                                                | -     | <sup>m</sup> 10.2% | -     |
| Cu <sub>4.16</sub> CeO <sub>2</sub> <sup>572</sup>                             | 0.1 M KHCO <sub>3</sub>               | 6 h    | -1.1 V vs. RHE     | -3.2                                                                                                                            | ~10%  | 47.6%              | -     |
| Cu-substituted                                                                 | 0.1 M KHCO <sub>3</sub>               | 8000s  | -1.8 V vs. RHE     | -70                                                                                                                             | 58%   | -                  | -     |

|                                                 |                         |      |                 |                                                                                                             |             |     |   |   |
|-------------------------------------------------|-------------------------|------|-----------------|-------------------------------------------------------------------------------------------------------------|-------------|-----|---|---|
| CeO <sub>2</sub> (4%) <sup>227</sup>            |                         |      |                 |                                                                                                             |             |     |   |   |
| Cu/CeO <sub>2-x</sub>                           | 0.1 M KHCO <sub>3</sub> | -    | -1.2 V vs. RHE  | -                                                                                                           | 54%         | -   | - | - |
| heterodimers <sup>573</sup>                     |                         |      |                 |                                                                                                             |             |     |   |   |
| La <sub>2</sub> CuO <sub>4</sub> <sup>574</sup> | 1 M KOH(flow cell)      | -    | -1.4 V vs. RHE  | 117(pcd)                                                                                                    | 56.3%       | -   | - | - |
| NGQDs <sup>575</sup>                            | 1 M KOH                 | -    | -0.75 V vs. RHE | <sup>m</sup> -13<br>(C <sub>2</sub> H <sub>5</sub> OH),<br><sup>m</sup> -28(C <sub>2</sub> H <sub>4</sub> ) | -           | 31% | - | - |
| N-doped C/CP <sup>576</sup>                     | [Bmim]BF <sub>4</sub>   | 5 h  | -1.4 V vs. SHE  | -1.42                                                                                                       | 93.5%       | -   | - | - |
| MoTe <sub>2</sub> layer <sup>577</sup>          | 0.1 M KHCO <sub>3</sub> | 45 h | -1.0 V vs. RHE  | -25.6                                                                                                       | 83 ± 3<br>% | -   | - | - |
| CuS@NF <sup>578</sup>                           | 0.1 M KHCO <sub>3</sub> | 60 h | -1.0 V vs. RHE  | <sup>m</sup> -7.3                                                                                           | 73 ± 5<br>% | -   | - | - |
| CuPc/CNT                                        | 0.5 M KHCO <sub>3</sub> | -    | -1.06 V vs. RHE | -13(pcd)                                                                                                    | 66%         | -   | - | - |

m: evaluated from the figures, pcd: partial current density, CE: current efficiency.

**Table 11.** CO<sub>2</sub>RR performance on materials with acetate and oxalate formation

| Catalyst                     | Electrolyte                                                                      | Durability | Potential          | Current                               |    | Products | FE       | Reference |
|------------------------------|----------------------------------------------------------------------------------|------------|--------------------|---------------------------------------|----|----------|----------|-----------|
|                              |                                                                                  |            |                    | density/<br>cm <sup>2</sup>           | mA |          |          |           |
| Cu(110)                      | 0.1 M KHCO <sub>3</sub>                                                          | -          | -1.58 V vs. SHE    | -5                                    |    | acetate  | CE.20.8% | 579       |
| NDD/Si RA                    | 0.5 M NaHCO <sub>3</sub>                                                         | 30 h       | -1.0 V vs. RHE     | m-1.0                                 |    | acetate  | 91.8%    | 580       |
| Cu(I) complex                | 25 mol%                                                                          | 5 h        | -1.3 V vs. RHE     | -13.9                                 |    | acetate  | 80.3%    | 581       |
| /BN-C                        | [Emim]BF <sub>4</sub> -<br>0.01M LiI-H <sub>2</sub> O                            |            |                    |                                       |    |          |          |           |
| Cu(10)-CNT                   | 0.5 M KHCO <sub>3</sub>                                                          | 24 h       | -1.4 V vs. Ag/AgCl | -100                                  |    | acetate  | 56.3%    | 582       |
| Fh-FeOOH/N-C                 | 0.05 M KHCO <sub>3</sub>                                                         | -          | -0.5 V vs. Ag/AgCl | -0.36                                 |    | acetate  | 60.9%    | 583       |
| In sheet                     | 0.1 M<br>Na <sub>2</sub> SO <sub>4</sub> +2mM<br>SiW <sub>9</sub> V <sub>3</sub> | -          | -0.71 V vs. RHE    | m-0.5                                 |    | acetate  | 96.5%    | 584       |
| Cu-Cu <sub>2</sub> O/Cu      | 0.1 M KCl                                                                        | 24 h       | -0.4 V vs. RHE     | -11.5                                 |    | acetate  | 48%      | 585       |
| N-NC/Cu                      | 0.5 M KHCO <sub>3</sub>                                                          | 120 h      | -0.5 V vs. RHE     | 102.2 A g <sub>Cu</sub> <sup>-1</sup> |    | acetate  | 34.7%    | 503       |
| MoO <sub>2</sub> /Pb(-20° -) | 0.1 M<br>TBAPF <sub>6</sub> /MeCN                                                | M 5 h      | -2.45 V vs. Fc/Fc+ | -20                                   |    | oxalate  | 45%      | 586       |
| Cr-Ga/GC                     | 0.1 M KCl                                                                        | 10 days    | -1.48 vs. Ag/AgCl  | -(8~10)                               |    | oxalate  | 59%      | 587       |

m: evaluated from the figures, pcd: partial current density, CE: current efficiency

## Reference:

1. Y. Hori, In *Modern aspects of electrochemistry*, Springer, 2008, 89-189.
2. D. Voiry, M. Chhowalla, Y. Gogotsi, N. A. Kotov, Y. Li, R. M. Penner, R. E. Schaak and P. S. Weiss, *ACS Nano*, 2018, **12**, 9635-9638.
3. T. Tian, H. Gao, X. C. Zhou, L. R. Zheng, J. F. Wu, K. Li and Y. Ding, *ACS Energy Lett.*, 2018, **3**, 2150-2158.
4. J. Gu, F. Heroguel, J. Luterbacher and X. Hu, *Angew. Chem. Int. Ed.*, 2018, **57**, 2943-2947.
5. K. Fan, Y. Jia, Y. Ji, P. Kuang, B. Zhu, X. Liu and J. Yu, *ACS Catal.*, 2019, **10**, 358-364.
6. Y. Hori, A. Murata, K. Kikuchi and S. Suzuki, *J. Chem. Soc., Chem. Commun.*, 1987, 728-729.
7. Y. Chen, C. W. Li and M. W. Kanan, *J. Am. Chem. Soc.*, 2012, **134**, 19969-19972.
8. W. Zhu, R. Michalsky, O. n. Metin, H. Lv, S. Guo, C. J. Wright, X. Sun, A. A. Peterson and S. Sun, *J. Am. Chem. Soc.*, 2013, **135**, 16833-16836.
9. E. B. Nursanto, H. S. Jeon, C. Kim, M. S. Jee, J. H. Koh, Y. J. Hwang and B. K. Min, *Catal. Today*, 2016, **260**, 107-111.
10. M. Liu, M. Liu, X. Wang, S. M. Kozlov, Z. Cao, P. De Luna, H. Li, X. Qiu, K. Liu, J. Hu, C. Jia, P. Wang, H. Zhou, J. He, M. Zhong, X. Lan, Y. Zhou, Z. Wang, J. Li, A. Seifitokaldani, D. Cao Thang, H. Liang, C. Zou, D. Zhang, Y. Yang, T.-S. Chan, Y. Han, L. Cavallo, T.-K. Sham, B.-J. Hwang and E. H. Sargent, *Joule*, 2019, **3**, 1703-1718.
11. L. H. a. W. H. Yicheng Zhang, *J. Mater. Chem. A*, 2018, **6**, 23610-23620.
12. W. Zhu, Y.-J. Zhang, H. Zhang, H. Lv, Q. Li, R. Michalsky, A. A. Peterson and S. Sun, *J. Am. Chem. Soc.*, 2014, **136**, 16132-16135.
13. M. Cho, J. M. Kim, B. Kim, S. Yim, Y. J. Kim, Y. S. Jung and J. Oh, *J. Mater. Chem. A*, 2019, **7**, 6045-6052.
14. E. Andrews, S. Katla, C. Kumar, M. Patterson, P. Sprunger and J. Flake, *J. Electrochem. Soc.*, 2015, **162**, F1373-F1378.
15. A. S. Hall, Y. Yoon, A. Wuttig and Y. Surendranath, *J. Am. Chem. Soc.*, 2015, **137**, 14834-14837.
16. M. Liu, Y. Pang, B. Zhang, P. De Luna, O. Voznyy, J. Xu, X. Zheng, C. T. Dinh, F. Fan,

- C. Cao, F. P. de Arquer, T. S. Safaei, A. Mepham, A. Klinkova, E. Kumacheva, T. Filleter, D. Sinton, S. O. Kelley and E. H. Sargent, *Nature*, 2016, **537**, 382-386.
17. T. Saberi Safaei, A. Mepham, X. Zheng, Y. Pang, C.-T. Dinh, M. Liu, D. Sinton, S. O. Kelley and E. H. Sargent, *Nano Lett.*, 2016, **16**, 7224-7228.
18. C. Chen, B. Zhang, J. Zhong and Z. Cheng, *J. Mater. Chem. A*, 2017, **5**, 21955-21964.
19. M. N. Hossain, Z. G. Liu, J. L. Wen and A. C. Chen, *Appl. Catal. B Environ.*, 2018, **236**, 483-489.
20. X. Wen, L. Chang, Y. Gao, J. Han, Z. Bai, Y. Huan, M. Li, Z. Tang and X. Yan, *Inorg. Chem. Front.*, 2018, **5**, 1207-1212.
21. W. Zhang, J. He, S. Liu, W. Niu, P. Liu, Y. Zhao, F. Pang, W. Xi, M. Chen, W. Zhang, S.-S. Pang and Y. Ding, *Nanoscale*, 2018, **10**, 8372-8376.
22. G. Hyun, J. T. Song, C. Ahn, Y. Ham, D. Cho, J. Oh and S. Jeon, *Proc. Natl. Acad. Sci. U.S.A.*, 2020, **117**, 5680-5685.
23. Z. Qi, J. Biener and M. Biener, *ACS Appl. Energy Mater.*, 2019, **2**, 7717-7721.
24. K. S. Kwok, Y. Wang, M. C. Cao, H. Shen, Z. He, G. Poirier, B. E. McCandless, K. J. Livi, D. A. Muller, C. Wang and D. H. Gracias, *Nano Lett.*, 2019, **19**, 9154-9159.
25. J. Kim, J. T. Song, H. Ryoo, J.-G. Kim, S.-Y. Chung and J. Oh, *J. Mater. Chem. A*, 2018, **6**, 5119-5128.
26. Y. Wang, J. Liu, Y. Wang, Y. Wang and G. Zheng, *Nat. Commun.*, 2018, **9**, 5003.
27. X. Feng, K. Jiang, S. Fan and M. W. Kanan, *J. Am. Chem. Soc.*, 2015, **137**, 4606-4609.
28. C. Rogers, W. S. Perkins, G. Veber, T. E. Williams, R. R. Cloke and F. R. Fischer, *J. Am. Chem. Soc.*, 2017, **139**, 4052-4061.
29. D. Gao, Y. Zhang, Z. Zhou, F. Cai, X. Zhao, W. Huang, Y. Li, J. Zhu, P. Liu, F. Yang, G. Wang and X. Bao, *J. Am. Chem. Soc.*, 2017, **139**, 5652-5655.
30. L. Zhang, F. Mao, L. R. Zheng, H. F. Wang, X. H. Yang and H. G. Yang, *ACS Catal.*, 2018, **8**, 11035-11041.
31. Z. Ma, C. Lian, D. Niu, L. Shi, S. Hu, X. Zhang and H. Liu, *ChemSusChem*, 2019, **12**, 1724-1731.
32. Y. Wu, X. Yuan, Z. Tao and H. Wang, *Chem. Commun.*, 2019, **55**, 8864-8867.
33. K. Sun, T. Cheng, L. Wu, Y. Hu, J. Zhou, A. Macleannan, Z. Jiang, Y. Gao, W. A.

- Goddard, 3rd and Z. Wang, *J. Am. Chem. Soc.*, 2017, **139**, 15608-15611.
34. D. Kim, C. Xie, N. Becknell, Y. Yu, M. Karamad, K. Chan, E. J. Crumlin, J. K. Norskov and P. Yang, *J. Am. Chem. Soc.*, 2017, **139**, 8329-8336.
35. J. Liu, Y. Wang, H. Jiang, H. Jiang, X. Zhou, Y. Li and C. Li, *Chem.-Asian J.*, 2020, **15**, 425-431.
36. X. Ma, Y. Shen, S. Yao, C. An, W. Zhang, J. Zhu, R. Si, C. Guo and C. An, *J. Mater. Chem. A*, 2020, **8**, 3344-3350.
37. S. Zhu, X. Qin, Q. Wang, T. Li, R. Tao, M. Gu and M. Shao, *J. Mater. Chem. A*, 2019, **7**, 16954-16961.
38. W. J. Zhu, L. Zhang, P. P. Yang, C. L. Hu, H. Dong, Z. J. Zhao, R. T. Mu and J. L. Gong, *ACS Energy Lett.*, 2018, **3**, 2144-2149.
39. S. Zhao, Z. Tang, S. Guo, M. Han, C. Zhu, Y. Zhou, L. Bai, J. Gao, H. Huang, Y. Li, Y. Liu and Z. Kang, *ACS Catal.*, 2018, **8**, 188-197.
40. M. Cho, J. T. Song, S. Back, Y. Jung and J. Oh, *ACS Catal.*, 2018, **8**, 1178-1185.
41. Z. Cao, S. B. Zacate, X. Sun, J. Liu, E. M. Hale, W. P. Carson, S. B. Tyndall, J. Xu, X. Liu, X. Liu, C. Song, J. H. Luo, M. J. Cheng, X. Wen and W. Liu, *Angew. Chem. Int. Ed.*, 2018, **57**, 12675-12679.
42. Y. Zhao, C. Y. Wang, Y. Q. Liu, D. R. MacFarlane and G. G. Wallace, *Adv. Energy Mater.*, 2018, **8**, 1801400.
43. M. W. Chung, I. Y. Cha, M. G. Ha, Y. Na, J. Hwang, H. C. Ham, H.-J. Kim, D. Henkensmeier, S. J. Yoo, J. Y. Kim, S. Y. Lee, H. S. Park and J. H. Jang, *Appl. Catal. B Environ.*, 2018, **237**, 673-680.
44. L. Ma, W. Hu, Q. Pan, L. Zou, Z. Zou, K. Wen and H. Yang, *J. CO2 Util.*, 2019, **34**, 108-114.
45. M. R. Singh, Y. Kwon, Y. Lum, J. W. Ager and A. T. Bell, *J. Am. Chem. Soc.*, 2016, **138**, 13006-13012.
46. B. A. Rosen, A. Salehi-Khojin, M. R. Thorson, W. Zhu, D. T. Whipple, P. J. Kenis and R. I. Masel, *Science*, 2011, **334**, 643-644.
47. F. Zhou, S. Liu, B. Yang, P. Wang, A. S. Alshammari and Y. Deng, *Electrochem. Commun.*, 2014, **46**, 103-106.

48. S. B. Liu, C. Sun, J. Xiao and J. L. Luo, *ACS Catal.*, 2020, **10**, 3158-3163.
49. W. Xi, R. Ma, H. Wang, Z. Gao, W. Zhang and Y. Zhao, *ACS Sustain. Chem. Eng.*, 2018, **6**, 7687-7694.
50. S. Liu, X.-Z. Wang, H. Tao, T. Li, Q. Liu, Z. Xu, X.-Z. Fu and J.-L. Luo, *Nano Energy*, 2018, **45**, 456-462.
51. C. Luan, Y. Shao, Q. Lu, S. Gao, K. Huang, H. Wu and K. Yao, *ACS Appl. Mater. Interfaces*, 2018, **10**, 17950-17956.
52. Q. Lu, J. Rosen, Y. Zhou, G. S. Hutchings, Y. C. Kimmel, J. G. Chen and F. Jiao, *Nat. Commun.*, 2014, **5**, 3242.
53. L. Zhang, Z. Wang, N. Mehio, X. Jin and S. Dai, *ChemSusChem*, 2016, **9**, 428-432.
54. H. Wang, Z. Han, L. Zhang, C. Cui, X. Zhu, X. Liu, J. Han and Q. Ge, *J. CO<sub>2</sub> Util.*, 2016, **15**, 41-49.
55. T. Fan, Q. Wu, Z. Yang, Y. Song, J. Zhang, P. Huang, Z. Chen, Y. Dong, W. Fang and X. Yi, *ChemSusChem*, 2020, **13**, 2677-2683.
56. C.-Y. Lee, Y. Zhao, C. Wang, D. R. G. Mitchell and G. G. Wallace, *Sustain. Energy Fuels*, 2017, **1**, 1023-1027.
57. Y. Yoon, A. S. Hall and Y. Surendranath, *Angew. Chem. Int. Ed.*, 2016, **55**, 15282-15286.
58. M. Ma, B. J. Trzesniewski, J. Xie and W. A. Smith, *Angew. Chem. Int. Ed.*, 2016, **55**, 9748-9752.
59. M. Ma, K. Liu, J. Shen, R. Kas and W. A. Smith, *ACS Energy Lett.*, 2018, **3**, 1301-1306.
60. X. Peng, S. G. Karakalos and W. E. Mustain, *ACS Appl. Mater. Interfaces*, 2018, **10**, 1734-1742.
61. C.-T. Dinh, F. P. García de Arquer, D. Sinton and E. H. Sargent, *ACS Energy Lett.*, 2018, **3**, 2835-2840.
62. Y. Zhang, L. Ji, W. Qiu, X. Shi, A. M. Asiri and X. Sun, *Chem. Commun.*, 2018, **54**, 2666-2669.
63. J. Gao, C. Zhu, M. Zhu, Y. Fu, H. Huang, Y. Liu and Z. Kang, *ACS Sustain. Chem. Eng.*, 2019, **7**, 3536-3543.
64. C.-Y. Lee and G. G. Wallace, *J. Mater. Chem. A*, 2018, **6**, 23301-23307.
65. Q. Jianping, T. Juntao, S. Jie, W. Cuiwei, Q. Mengqian, H. Zhiqiao, C. Jianmeng and S.

- Song, *Electrochim. Acta*, 2016, **203**, 99-108.
66. Y.-C. Hsieh, S. D. Senanayake, Y. Zhang, W. Xu and D. E. Polyansky, *ACS Catal.*, 2015, **5**, 5349-5356.
67. H. Q. Fu, L. Zhang, L. R. Zheng, P. F. Liu, H. Zhao and H. G. Yang, *J. Mater. Chem. A*, 2019, **7**, 12420-12425.
68. C. Kim, T. Eom, M. S. Jee, H. Jung, H. Kim, B. K. Min and Y. J. Hwang, *ACS Catal.*, 2017, **7**, 779-785.
69. C. Kim, H. S. Jeon, T. Eom, M. S. Jee, H. Kim, C. M. Friend, B. K. Min and Y. J. Hwang, *J. Am. Chem. Soc.*, 2015, **137**, 13844-13850.
70. L. Wei, H. Li, J. Chen, Z. Yuan, C. Huang, X. Liao, G. Henkelman and Y. Chen, *ACS Catal.*, 2020, **10**, 1444-1453.
71. L. Shi, Y. Zhang, X. Han, D. Niu, J. Sun, J. Y. Yang, S. Hu and X. Zhang, *Chinese J. Chem.*, 2019, **37**, 337-341.
72. Y. Pan, W. J. Paschoalino, S. S. Bayram, A. S. Blum and J. Mauzeroll, *Nanoscale*, 2019, **11**, 18595-18603.
73. S. Ma, R. Luo, J. I. Gold, A. Z. Yu, B. Kim and P. J. A. Kenis, *J. Mater. Chem. A*, 2016, **4**, 8573-8578.
74. S. X. Guo, F. Li, L. Chen, D. R. MacFarlane and J. Zhang, *ACS Appl Mater Interfaces*, 2018, **10**, 12690-12697.
75. S. C. Abeyweera, J. Yu, J. P. Perdew, Q. Yan and Y. Sun, *Nano Lett.*, 2020, **20**, 2806-2811.
76. S. M. Lee, H. Lee, J. Kim, S. H. Ahn and S. T. Chang, *Appl. Catal. B Environ.*, 2019, **259**, 118045.
77. H. Mistry, Y.-W. Choi, A. Bagger, F. Scholten, C. S. Bonifacio, I. Sinev, N. J. Divins, I. Zegkinoglou, H. S. Jeon, K. Kisslinger, E. A. Stach, J. C. Yang, J. Rossmeisl and B. Roldan Cuenya, *Angew. Chem. Int. Ed.*, 2017, **56**, 11394-11398.
78. M. S. Jee, H. S. Jeon, C. Kim, H. Lee, J. H. Koh, J. Cho, B. K. Min and Y. J. Hwang, *Appl. Catal. B Environ.*, 2016, **180**, 372-378.
79. L. QináZhou, *Chem. Commun.*, 2015, **51**, 17704-17707.
80. R. Daiyan, X. Lu, Y. H. Ng and R. Amal, *Chemistryselect*, 2017, **2**, 879-884.



81. A. Dutta, C. E. Morstein, M. Rahaman, A. C. Lopez and P. Broekmann, *ACS Catal.*, 2018, **8**, 8357-8368.
82. K. Jiang, P. Kharel, Y. Peng, M. K. Gangishetty, H.-Y. G. Lin, E. Stavitski, K. Attenkofer and H. Wang, *ACS Sustain. Chem. Eng.*, 2017, **5**, 8529-8534.
83. S. Ma, Y. Lan, G. M. J. Perez, S. Moniri and P. J. A. Kenis, *ChemSusChem*, 2014, **7**, 866-874.
84. Z. Cai, Y. Wu, Z. Wu, L. Yin, Z. Weng, Y. Zhong, W. Xu, X. Sun and H. Wang, *ACS Energy Lett.*, 2018, **3**, 2816-2822.
85. J. Zhang, M. Qiao, Y. Li, Q. Shao and X. Huang, *ACS Appl. Mater. Interfaces*, 2019, **11**, 39722-39727.
86. H. Li, P. Wen, D. S. Itanze, Z. D. Hood, X. Ma, M. Kim, S. Adhikari, C. Lu, C. Dun, M. Chi, Y. Qiu and S. M. Geyer, *Nat. Commun.*, 2019, **10**, 5724.
87. L. Hu, Y. Zhang and W. Han, *New J. Chem.*, 2019, **43**, 3269-3272.
88. H. Huang, H. Jia, Z. Liu, P. Gao, J. Zhao, Z. Luo, J. Yang and J. Zeng, *Angew. Chem. Int. Ed.*, 2017, **56**, 3594-3598.
89. W. L. Zhu, S. Kattel, F. Jiao and J. G. G. Chen, *Adv. Energy Mater.*, 2019, **9**, 1802840.
90. D. Gao, H. Zhou, J. Wang, S. Miao, F. Yang, G. Wang, J. Wang and X. Bao, *J. Am. Chem. Soc.*, 2015, **137**, 4288-4291.
91. D. F. Gao, H. Zhou, F. Cai, D. N. Wang, Y. F. Hu, B. Jiang, W. B. Cai, X. Q. Chen, R. Si, F. Yang, S. Miao, J. G. Wang, G. X. Wang, X. H. Bao, *Nano Res.*, 2017, **10**, 2181-2191.
92. W. Sheng, S. Kattel, S. Yao, B. Yan, Z. Liang, C. J. Hawxhurst, Q. Wu and J. G. Chen, *Energy Environ. Sci.*, 2017, **10**, 1180-1185.
93. R. Chen, M. Cao, W. Yang, H. Wang, S. Zhang, H. Li and R. Cao, *Chem. Commun.*, 2019, **55**, 9805-9808.
94. W. Zhu, L. Zhang, P. Yang, X. Chang, H. Dong, A. Li, C. Hu, Z. Huang, Z. J. Zhao and J. Gong, *Small*, 2018, **14**, 1703314.
95. Z. Yin, D. Gao, S. Yao, B. Zhao, F. Cai, L. Lin, P. Tang, P. Zhai, G. Wang, D. Ma and X. Bao, *Nano Energy*, 2016, **27**, 35-43.
96. Y. Mun, S. Lee, A. Cho, S. Kim, J. W. Han and J. Lee, *Appl. Catal. B Environ.*, 2019, **246**, 82-88.

97. S. Zhu, Q. Wang, X. Qin, M. Gu, R. Tao, B. P. Lee, L. Zhang, Y. Yao, T. Li and M. Shao, *Adv. Energy Mater.*, 2018, **8**, 1802238.
98. H. C. Tao, X. F. Sun, S. Back, Z. S. Han, Q. G. Zhu, A. W. Robertson, T. Ma, Q. Fan, B. X. Han, Y. Jung and Z. Y. Sun, *Chem. Sci.*, 2018, **9**, 483-487.
99. W. Zhu, L. Zhang, P. Yang, C. Hu, Z. Luo, X. Chang, Z. J. Zhao and J. Gong, *Angew. Chem. Int. Ed.*, 2018, **57**, 11544-11548.
100. F. Quan, D. Zhong, H. Song, F. Jia and L. Zhang, *J. Mater. Chem. A*, 2015, **3**, 16409-16413.
101. J. Rosen, G. S. Hutchings, Q. Lu, R. V. Forest, A. Moore and F. Jiao, *ACS Catal.*, 2015, **5**, 4586-4591.
102. W. Luo, J. Zhang, M. Li and A. Zuttel, *ACS Catal.*, 2019, **9**, 3783-3791.
103. D. H. Won, H. Shin, J. Koh, J. Chung, H. S. Lee, H. Kim and S. I. Woo, *Angew. Chem. Int. Ed.*, 2016, **55**, 9297-9300.
104. N. Dang Le Tri, M. S. Jee, D. H. Won, H. Jung, H.-S. Oh, B. K. Min and Y. J. Hwang, *ACS Sustain. Chem. Eng.*, 2017, **5**, 11377-11386.
105. K. Jiang, H. Wang, W.-B. Cai and H. Wang, *ACS Nano*, 2017, **11**, 6451-6458.
106. F.-x. Shen, J. Shi, T.-y. Chen, F. Shi, Q.-y. Li, J.-z. Zhen, Y.-f. Li, Y.-n. Dai, B. Yang and T. Qu, *J. Power Sources*, 2018, **378**, 555-561.
107. Z. Geng, X. Kong, W. Chen, H. Su, Y. Liu, F. Cai, G. Wang and J. Zeng, *Angew. Chem. Int. Ed.*, 2018, **57**, 6054-6059.
108. W. Ma, H. Wang, W. Yu, X. Wang, Z. Xu, X. Zong and C. Li, *Angew. Chem. Int. Ed.*, 2018, **57**, 3473-3477.
109. C. L. Li, G. R. Shen, R. Zhang, D. Y. Wu, C. Q. Zou, T. Ling, H. Liu, C. K. Dong and X. W. Du, *J. Mater. Chem. A*, 2019, **7**, 1418-1423.
110. T. Zhang, X. Li, Y. Qiu, P. Su, W. Xu, H. Zhong and H. Zhang, *J. Catal.*, 2018, **357**, 154-162.
111. K. Liu, J. Wang, M. Shi, J. Yan and Q. Jiang, *Adv. Energy Mater.*, 2019, **9**, 1900276.
112. M. Zhao, Y. Gu, P. Chen, Z. Xin, H. Zhu, B. Wang, K. Zhu, S. Yan and Z. Zou, *J. Mater. Chem. A*, 2019, **7**, 9316-9323.
113. M. Ma, K. Djanashvili and W. A. Smith, *Phys. Chem. Chem. Phys.*, 2015, **17**, 20861-

20867.

114. D. Raciti, K. J. Livi and C. Wang, *Nano Lett.*, 2015, **15**, 6829-6835.
115. L. Cao, D. Raciti, C. Li, K. J. T. Livi, P. F. Rottmann, K. J. Hemker, T. Mueller and C. Wang, *ACS Catal.*, 2017, **7**, 8578-8587.
116. J. Chung, J. Koh, E.-H. Kim and S. I. Woo, *Phys. Chem. Chem. Phys.*, 2016, **18**, 6252-6258.
117. R. Kas, K. K. Hummadi, R. Kortlever, P. de Wit, A. Milbrat, M. W. Luiten-Olieman, N. E. Benes, M. T. Koper and G. Mul, *Nat. Commun.*, 2016, **7**, 10748.
118. X. Zheng, J. Han, Y. Fu, Y. Deng, Y. Liu, Y. Yang, T. Wang and L. Zhang, *Nano Energy*, 2018, **48**, 93-100.
119. N.-P. Thuy-Duong, C. Wang, C. M. Marin, Y. Zhou, E. Stavitski, E. J. Popczun, Y. Yu, W. Xu, B. H. Howard, M. Y. Stuckman, I. Waluyo, P. R. Ohodnicki, Jr. and D. R. Kauffman, *J. Mater. Chem. A*, 2019, **7**, 27576-27584.
120. J. Pan, Y. Sun, P. Deng, F. Yang, S. Chen, Q. Zhou, H. S. Park, H. Liu and B. Yu Xia, *Appl. Catal. B Environ.*, 2019, **255**, 117736.
121. G. O. Larrazabal, A. J. Martin, F. Krumeich, R. Hauert and J. Perez-Ramirez, *ChemSusChem*, 2017, **10**, 1255-1265.
122. Y. Zhao, C. Wang and G. G. Wallace, *J. Mater. Chem. A*, 2016, **4**, 10710-10718.
123. Q. Li, J. Fu, W. Zhu, Z. Chen, B. Shen, L. Wu, Z. Xi, T. Wang, G. Lu, J. J. Zhu and S. Sun, *J. Am. Chem. Soc.*, 2017, **139**, 4290-4293.
124. S. Sarfraz, A. T. Garcia-Esparza, A. Jedidi, L. Cavallo and K. Takanebe, *ACS Catal.*, 2016, **6**, 2842-2851.
125. A. Vasileff, C. Xu, L. Ge, Y. Zheng and S. Z. Qiao, *Chem. Commun.*, 2018, **54**, 13965-13968.
126. C. Wang, M. Cao, X. Jiang, M. Wang and Y. Shen, *Electrochim. Acta*, 2018, **271**, 544-550.
127. J. Medina-Ramos, R. C. Pupillo, T. P. Keane, J. L. DiMeglio and J. Rosenthal, *J. Am. Chem. Soc.*, 2015, **137**, 5021-5027.
128. L. Dai, Q. Qin, P. Wang, X. Zhao, C. Hu, P. Liu, R. Qin, M. Chen, D. Ou, C. Xu, S. Mo, B. Wu, G. Fu, P. Zhang and N. Zheng, *Sci. Adv.*, 2017, **3**, e1701069-e1701069.

129. D. Tan, J. Zhang, X. Cheng, X. Tan, J. Shi, B. Zhang, B. Han, L. Zheng and J. Zhang, *Chem. Sci.*, 2019, **10**, 4491-4496.
130. W. Zhang, J. Zeng, H. Liu, Z. Shi, Y. Tang and Q. Gao, *J. Catal.*, 2019, **372**, 277-286.
131. H. Yang, Y. w. Hu, J. j. Chen, M. S. Balogun, P. p. Fang, S. Zhang, J. Chen and Y. Tong, *Adv. Energy Mater.*, 2019, **9**, 1901396.
132. S. Rasul, D. H. Anjum, A. Jedidi, Y. Minenkov, L. Cavallo and K. Takanebe, *Angew. Chem. Int. Ed.*, 2015, **127**, 2174-2178.
133. A. Jedidi, S. Rasul, D. Masih, L. Cavallo and K. Takanebe, *J. Mater. Chem. A*, 2015, **3**, 19085-19092.
134. Y. J. Jang, J. Lee, J. H. Kim, B. J. Lee and J. S. Lee, *J. Power Sources*, 2018, **378**, 412-417.
135. W. Guo, X. Sun, C. Chen, D. Yang, L. Lu, Y. Yang and B. Han, *Green Chem.*, 2019, **21**, 503-508.
136. W. Luo, W. Xie, R. Mutschler, E. Oveisi, G. L. De Gregorio, R. Buonsanti and A. Züttel, *ACS Catal.*, 2018, **8**, 6571-6581.
137. G. O. Barasa, T. Yu, X. Lu, X. Zhou, H. Wang, L. Qian, Y. Yu, L. Liu and P. Lei, *Electrochim. Acta*, 2019, **295**, 584-590.
138. S. Chu, S. Hong, J. Masa, X. Li and Z. Sun, *Chem. Commun.*, 2019, **55**, 12380-12383.
139. H. Xiang, S. Rasul, B. Hou, J. Portoles, P. Curnpson and E. H. Yu, *ACS Appl. Mater. Interfaces*, 2020, **12**, 601-608.
140. M. Wang, X. Ren, G. Yuan, X. Niu, Q. Xu, W. Gao, S. Zhu and Q. Wang, *J. CO2 Util.*, 2020, **37**, 204-212.
141. W. Zhang, C. Xu, Y. Hu, S. Yang, L. Ma, L. Wang, P. Zhao, C. Wang, J. Ma and Z. Jin, *Nano Energy*, 2020, **73**, 104796.
142. P. Shao, S. Ci, L. Yi, P. Cai, P. Huang, C. Cao and Z. Wen, *ChemElectroChem*, 2017, **4**, 2593-2598.
143. F. Urbain, P. Tang, N. M. Carretero, T. Andreu, J. Arbiol and J. R. Morante, *ACS Appl. Mater. Interfaces*, 2018, **10**, 43650-43660.
144. X. Xiao, Y. Xu, X. Lv, J. Xie, J. Liu and C. Yu, *J. Colloid Interf. Sci.*, 2019, **545**, 1-7.
145. M. Peng, S. Ci, P. Shao, P. Cai and Z. Wen, *J. Nanosci. Nanotechnol.*, 2019, **19**, 3232-

3236.

146. Y. Zhou, X. Guo, X. Li, J. Fu, J. Liu, F. Hong and J. Qiao, *J. CO<sub>2</sub> Util.*, 2020, **37**, 188-194.
147. H. Park, J. Choi, H. Kim, E. Hwang, D.-H. Ha, S. H. Ahn and S.-K. Kim, *Appl. Catal. B Environ.*, 2017, **219**, 123-131.
148. C. I. Shaughnessy, D. T. Jantz and K. C. Leonard, *J. Mater. Chem. A*, 2017, **5**, 22743-22749.
149. A. Aljabour, H. Coskun, D. H. Apaydin, F. Ozel, A. W. Hassel, P. Stadler, N. S. Sariciftci and M. Kus, *Appl. Catal. B Environ.*, 2018, **229**, 163-170.
150. C. Yan, L. Lin, D. Gao, G. Wang and X. Bao, *J. Mater. Chem. A*, 2018, **6**, 19743-19749.
151. M. Asadi, B. Kumar, A. Behranginia, B. A. Rosen, A. Baskin, N. Reppin, D. Pisasale, P. Phillips, W. Zhu, R. Haasch, R. F. Klie, P. Kral, J. Abiade and A. Salehi-Khojin, *Nat. Commun.*, 2014, **5**, 4470.
152. P. Abbasi, M. Asadi, C. Liu, S. Sharifi-Asl, B. Sayahpour, A. Behranginia, P. Zapol, R. Shahbazian-Yassar, L. A. Curtiss and A. Salehi-Khojin, *ACS Nano*, 2017, **11**, 453-460.
153. M. Asadi, K. Kim, C. Liu, A. V. Addepalli, P. Abbasi, P. Yasaei, P. Phillips, A. Behranginia, J. M. Cerrato, R. Haasch, P. Zapol, B. Kumar, R. F. Klie, J. Abiade, L. A. Curtiss and A. Salehi-Khojin, *Science*, 2016, **353**, 467-470.
154. F. Li, S.-F. Zhao, L. Chen, A. Khan, D. R. MacFarlane and J. Zhang, *Energy Environ. Sci.*, 2016, **9**, 216-223.
155. L. Yu, Y. Xie, J. Zhou, Y. Li, Y. Yu and Z. Ren, *J. Mater. Chem. A*, 2018, **6**, 4706-4713.
156. K. Lv, C. Teng, M. Shi, Y. Yuan, Y. Zhu, J. Wang, Z. Kong, X. Lu and Y. Zhu, *Adv. Funct. Mater.*, 2018, **28**, 1802339.
157. K. L. Lv, W. Q. Suo, M. D. Shao, Y. Zhu, X. P. Wang, J. J. Feng and M. W. Fang, *Nano Energy*, 2019, **63**, 103834.
158. S. Liu, H. Tao, Q. Liu, Z. Xu, Q. Liu and J.-L. Luo, *ACS Catal.*, 2018, **8**, 1469-1475.
159. J. Xu, X. Li, W. Liu, Y. Sun, Z. Ju, T. Yao, C. Wang, H. Ju, J. Zhu, S. Wei and Y. Xie, *Angew. Chem. Int. Ed.*, 2017, **56**, 9121-9125.
160. R. He, A. Zhang, Y. Ding, T. Kong, Q. Xiao, H. Li, Y. Liu and J. Zeng, *Adv. Mater.*, 2018, **30**, 1705872.

161. F.-Y. Gao, S.-J. Hu, X.-L. Zhang, Y.-R. Zheng, H.-J. Wang, Z.-Z. Niu, P.-P. Yang, R.-C. Bao, T. Ma, Z. Dang, Y. Guan, X.-S. Zheng, X. Zheng, J.-F. Zhu, M.-R. Gao and S.-H. Yu, *Angew. Chem. Int. Ed.*, 2020, **132**, 8784-8790.
162. B. Qin, Y. Li, H. Wang, G. Yang, Y. Cao, H. Yu, Q. Zhang, H. Liang and F. Peng, *Nano Energy*, 2019, **60**, 43-51.
163. D. Yang, Q. Zhu, X. Sun, C. Chen, W. Guo, G. Yang and B. Han, *Angew. Chem. Int. Ed.*, 2020, **59**, 2354-2359.
164. J. Shi, D. Shao, J. Zhang, D. Tan, X. Tan, B. Zhang, B. Han, F. Zhang, L. Liu and X. Cheng, *Chem. Commun.*, 2018, **54**, 5450-5453.
165. S. Piontek, K. Junge Puring, D. Siegmund, M. Smialkowski, I. Sinev, D. Tetzlaff, B. Roldan Cuenya and U. P. Apfel, *Chem. Sci.*, 2019, **10**, 1075-1081.
166. X. Huang, J. Song, H. Wu, C. Xie, M. Hua, Y. Hu and B. Han, *ChemSusChem*, 2020, DOI: 10.1002/cssc.202000329.
167. Z. Han, Q. Hu, Z. Cheng, G. Li, X. Huang, Z. Wang, H. Yang, X. Ren, Q. Zhang, J. Liu and C. He, *Adv. Funct. Mater.*, 2020, **30**, 2000154
168. T. N. Huan, N. Ranjbar, G. Rousse, M. Sougrati, A. Zitolo, V. Mougel, F. Jaouen and M. Fontecave, *ACS Catal.*, 2017, **7**, 1520-1525.
169. A. S. Varela, N. Ranjbar Sahraie, J. Steinberg, W. Ju, H.-S. Oh and P. Strasser, *Angew. Chem. Int. Ed.*, 2015, **54**, 10758-10762.
170. W. Ju, A. Bagger, G.-P. Hao, A. S. Varela, I. Sinev, V. Bon, B. Roldan Cuenya, S. Kaskel, J. Rossmeisl and P. Strasser, *Nat. Commun.*, 2017, **8**, 944.
171. J. Zhao, J. Deng, J. Han, S. Imhanria, K. Chen and W. Wang, *Chem. Eng. J.*, 2020, **389**.
172. X. M. Hu, H. H. Hval, E. T. Bjerglund, K. J. Dalgaard, M. R. Madsen, M. M. Pohl, E. Welter, P. Lamagni, K. B. Buhl, M. Bremholm, M. Beller, S. U. Pedersen, T. Skrydstrup and K. Daasbjerg, *ACS Catal.*, 2018, **8**, 6255-6264.
173. Y. Hou, Y.-B. Huang, Y.-L. Liang, G.-L. Chai, J.-D. Yi, T. Zhang, K.-T. Zang, J. Luo, R. Xu, H. Lin, S.-Y. Zhang, H.-M. Wang and R. Cao, *CCS Chem.*, 2019, **1**, 384-395.
174. Z. Ma, X. Zhang, D. Wu, X. Han, L. Zhang, H. Wang, F. Xu, Z. Gao and K. Jiang, *J. Colloid Interf. Sci.*, 2020, **570**, 31-40.
175. P. Lu, J. Zhang, H. He, M. Wang, Z. Luo, D. Gao, Z. Liu, X. Wang, M. Yuan, S. Dipazir,

- H. Zhao, Y. Xie and G. Zhang, *J. Power Sources*, 2020, **449**, 227496.
176. X. Rong, H. J. Wang, X. L. Lu, R. Si and T. B. Lu, *Angew. Chem. Int. Ed.*, 2020, **59**, 1961-1965.
177. N. Leonard, W. Ju, I. Sinev, J. Steinberg, F. Luo, A. S. Varela, B. Roldan Cuenya and P. Strasser, *Chem. Sci.*, 2018, **9**, 5064-5073.
178. Q. Cheng, K. Mao, L. Ma, L. Yang, L. Zou, Z. Zou, Z. Hu and H. Yang, *ACS Energy Lett.*, 2018, **3**, 1205-1211.
179. J. Jia, H. Yang, G. Wang, P. Huang, P. Cai and Z. Wen, *ChemElectroChem*, 2018, **5**, 471-477.
180. E. Li, F. Yang, Z. Wu, Y. Wang, M. Ruan, P. Song, W. Xing and W. Xu, *Small*, 2018, **14**, 1702827.
181. H. N. Zhang, J. Wang, Z. Zhao, H. F. Zhao, M. Cheng, A. N. Li, C. W. Wang, J. Y. Wang and J. Z. Wang, *Green Chem.*, 2018, **20**, 3521-3529.
182. J. Gu, C. S. Hsu, L. Bai, H. M. Chen and X. Hu, *Science*, 2019, **364**, 1091-1094.
183. F. Pan, B. Li, E. Sarnello, S. Hwang, Y. Gang, X. Feng, X. Xiang, N. M. Adli, T. Li, D. Su, G. Wu, G. Wang and Y. Li, *Nano Energy*, 2020, **68**, 104384.
184. H. Zhong, F. Meng, Q. Zhang, K. Liu and X. Zhang, *Nano Res.*, 2019, **12**, 2318-2323.
185. F. Quan, G. Zhan, H. Shang, Y. Huang, F. Jia, L. Zhang and Z. Ai, *Green Chem.*, 2019, **21**, 3256-3262.
186. X. S. Wang, Y. Y. Pan, H. Ning, H. M. Wang, D. L. Guo, W. H. Wang, Z. X. Yang, Q. S. Zhao, B. X. Zhang, L. R. Zheng, J. L. Zhang and M. B. Wu, *Appl. Catal. B Environ.*, 2020, **266**, 118630.
187. J. Tuo, Y. Zhu, L. Cheng, Y. Li, X. Yang, J. Shen and C. Li, *ChemSusChem*, 2019, **12**, 2644-2650.
188. H. Zhang, J. Li, S. Xi, Y. Du, X. Hai, J. Wang, H. Xu, G. Wu, J. Zhang, J. Lu and J. Wang, *Angew. Chem. Int. Ed.*, 2019, **58**, 14871-14876.
189. C. Hu, S. Bai, L. Gao, S. Liang, J. Yang, S.-D. Cheng, S.-B. Mi and J. Qiu, *ACS Catal.*, 2019, **9**, 11579-11588.
190. C. Hu, Y. Mu, S. Bai, J. Yang, L. Gao, S.-D. Cheng, S.-B. Mi and J. Qiu, *Carbon*, 2019, **153**, 609-616.

191. Y. Zhu, X. Li, X. Wang, K. Lv, G. Xiao, J. Feng, X. Jiang and M. Fang, *Chemistryselect*, 2020, **5**, 1282-1287.
192. P. Su, K. Iwase, S. Nakanishi, K. Hashimoto and K. Kamiya, *Small*, 2016, **12**, 6083-6089.
193. X. Li, W. Bi, M. Chen, Y. Sun, H. Ju, W. Yan, J. Zhu, X. Wu, W. Chu, C. Wu and Y. Xie, *J. Am. Chem. Soc.*, 2017, **139**, 14889-14892.
194. F. Pan, W. Deng, C. Justiniano and Y. Li, *Appl. Catal. B Environ.*, 2018, **226**, 463-472.
195. Y. Cheng, S. Zhao, H. Li, S. He, J.-P. Veder, B. Johannessen, J. Xiao, S. Lu, J. Pan, M. F. Chisholm, S.-Z. Yang, C. Liu, J. G. Chen and S. P. Jiang, *Appl. Catal. B Environ.*, 2019, **243**, 294-303.
196. H.-Y. Jeong, M. Balamurugan, V. S. K. Choutipalli, E.-s. Jeong, V. Subramanian, U. Sim and K. T. Nam, *J. Mater. Chem. A*, 2019, **7**, 10651-10661.
197. K. Mou, Z. Chen, X. Zhang, M. Jiao, X. Zhang, X. Ge, W. Zhang and L. Liu, *Small*, 2019, **15**, e1903668.
198. F. Pan, H. Zhang, Z. Liu, D. Cullen, K. Liu, K. More, G. Wu, G. Wang and Y. Li, *J. Mater. Chem. A*, 2019, **7**, 26231-26237.
199. C. F. Wen, F. Mao, Y. Liu, X. Y. Zhang, H. Q. Fu, L. R. Zheng, P. F. Liu and H. G. Yang, *ACS Catal.*, 2019, **10**, 1086-1093.
200. C.-Z. Yuan, K. Liang, X.-M. Xia, Z. K. Yang, Y.-F. Jiang, T. Zhao, C. Lin, T.-Y. Cheang, S.-L. Zhong and A.-W. Xu, *Catal. Sci. Technol.*, 2019, **9**, 3669-3674.
201. C.-Z. Yuan, H.-B. Li, Y.-F. Jiang, K. Liang, S.-J. Zhao, X.-X. Fang, L.-B. Ma, T. Zhao, C. Lin and A.-W. Xu, *J. Mater. Chem. A*, 2019, **7**, 6894-6900.
202. Q. Fan, P. Hou, C. Choi, T.-S. Wu, S. Hong, F. Li, Y.-L. Soo, P. Kang, Y. Jung and Z. Sun, *Adv. Energy Mater.*, 2020, **10**, 1903068.
203. S. Zhao, G. Chen, G. Zhou, L.-C. Yin, J.-P. Veder, B. Johannessen, M. Saunders, S.-Z. Yang, R. De Marco, C. Liu and S. P. Jiang, *Adv. Funct. Mater.*, 2020, **30**, 1906157.
204. S. He, D. Ji, J. Zhang, P. Novello, X. Li, Q. Zhang, X. Zhang and J. Liu, *J. Phys. Chem. B*, 2020, **124**, 511-518.
205. W. Zheng, C. Guo, J. Yang, F. He, B. Yang, Z. Li, L. Lei, J. Xiao, G. Wu and Y. Hou, *Carbon*, 2019, **150**, 52-59.
206. R. Daiyan, X. Lu, X. Tan, X. Zhu, R. Chen, S. C. Smith and R. Amal, *ACS Appl. Energy*



- Mater.*, 2019, **2**, 8002-8009.
207. S. Ye, G. Fan, J. Xu, L. Yang and F. Li, *Electrochim. Acta*, 2020, **334**, 135583.
208. W. Kou, Y. Zhang, J. Dong, C. Mu and L. Xu, *ACS Appl. Energy Mater.*, 2020, **3**, 1875-1882.
209. W. Zhu, J. Fu, J. Liu, Y. Chen, X. Li, K. Huang, Y. Cai, Y. He, Y. Zhou, D. Su, J.-J. Zhu and Y. Lin, *Appl. Catal. B Environ.*, 2020, **264**, 118502.
210. D. Tan, C. Cui, J. Shi, Z. Luo, B. Zhang, X. Tan, B. Han, L. Zheng, J. Zhang and J. Zhang, *Nano Res.*, 2019, **12**, 1167-1172.
211. X. Wang, D. Wu, C. Dai, C. Xu, P. Sui, R. Feng, Y. Wei, X.-Z. Fu and J.-L. Luo, *J. Mater. Chem. A*, 2020, **8**, 5105-5114.
212. Z. Chen, K. Mou, S. Yao and L. Liu, *ChemSusChem*, 2018, **11**, 2944-2952.
213. Y. Guo, H. Yang, X. Zhou, K. Liu, C. Zhang, Z. Zhou, C. Wang and W. Lin, *J. Mater. Chem. A*, 2017, **5**, 24867-24873.
214. Y. Ye, F. Cai, H. Li, H. Wu, G. Wang, Y. Li, S. Miao, S. Xie, R. Si, J. Wang and X. Bao, *Nano Energy*, 2017, **38**, 281-289.
215. Y. Zhao, J. J. Liang, C. Y. Wang, J. M. Ma and G. G. Wallace, *Adv. Energy Mater.*, 2018, **8**, 1702524.
216. C. Zhao, X. Dai, T. Yao, W. Chen, X. Wang, J. Wang, J. Yang, S. Wei, Y. Wu and Y. Li, *J. Am. Chem. Soc.*, 2017, **139**, 8078-8081.
217. X. Wang, Z. Chen, X. Zhao, T. Yao, W. Chen, R. You, C. Zhao, G. Wu, J. Wang, W. Huang, J. Yang, X. Hong, S. Wei, Y. Wu and Y. Li, *Angew. Chem. Int. Ed.*, 2018, **130**, 1962-1966.
218. Y. Pan, R. Lin, Y. Chen, S. Liu, W. Zhu, X. Cao, W. Chen, K. Wu, W.-C. Cheong, Y. Wang, L. Zheng, J. Luo, Y. Lin, Y. Liu, C. Liu, J. Li, Q. Lu, X. Chen, D. Wang, Q. Peng, C. Chen and Y. Li, *J. Am. Chem. Soc.*, 2018, **140**, 4218-4221.
219. Z. Geng, Y. Cao, W. Chen, X. Kong, Y. Liu, T. Yao and Y. Lin, *Appl. Catal. B Environ.*, 2019, **240**, 234-240.
220. H. Yang, Q. Lin, Y. Wu, G. Li, Q. Hu, X. Chai, X. Ren, Q. Zhang, J. Liu and C. He, *Nano Energy*, 2020, **70**, 104454.
221. H. B. Yang, S.-F. Hung, S. Liu, K. Yuan, S. Miao, L. Zhang, X. Huang, H.-Y. Wang, W.

- Cai, R. Chen, J. Gao, X. Yang, W. Chen, Y. Huang, H. M. Chen, C. M. Li, T. Zhang and B. Liu, *Nature Energy*, 2018, **3**, 140-147.
222. T. Zheng, K. Jiang, N. Ta, Y. Hu, J. Zeng, J. Liu and H. Wang, *Joule*, 2019, **3**, 265-278.
223. Y. Cheng, S. Zhao, B. Johannessen, J.-P. Veder, M. Saunders, M. R. Rowles, M. Cheng, C. Liu, M. F. Chisholm, R. De Marco, H.-M. Cheng, S.-Z. Yang and S. P. Jiang, *Adv. Mater.*, 2018, **30**, 1706287-1706287.
224. C. Yan, H. Li, Y. Ye, H. Wu, F. Cai, R. Si, J. Xiao, S. Miao, S. Xie, F. Yang, Y. Li, G. Wang and X. Bao, *Energy Environ. Sci.*, 2018, **11**, 1204-1210.
225. H. Yang, Q. Lin, C. Zhang, X. Yu, Z. Cheng, G. Li, Q. Hu, X. Ren, Q. Zhang, J. Liu and C. He, *Nat. Commun.*, 2020, **11**, 593.
226. W. Zheng, J. Yang, H. Chen, Y. Hou, Q. Wang, M. Gu, F. He, Y. Xia, Z. Xia, Z. Li, B. Yang, L. Lei, C. Yuan, Q. He, M. Qiu and X. Feng, *Adv. Funct. Mater.*, 2019, **30**, 1907658.
227. Y. F. Wang, Z. Chen, P. Han, Y. H. Du, Z. X. Gu, X. Xu and G. F. Zheng, *ACS Catal.*, 2018, **8**, 7113-7119.
228. X. L. Jiang, H. B. Li, J. P. Xiao, D. F. Gao, R. Si, F. Yang, Y. S. Li, G. X. Wang and X. H. Bao, *Nano Energy*, 2018, **52**, 345-350.
229. W. Bi, X. Li, R. You, M. Chen, R. Yuan, W. Huang, X. Wu, W. Chu, C. Wu and Y. Xie, *Adv Mater*, 2018, **30**, e1706617.
230. G. Zhang, Y. Jia, C. Zhang, X. Xiong, K. Sun, R. Chen, W. Chen, Y. Kuang, L. Zheng, H. Tang, W. Liu, J. Liu, X. Sun, W.-F. Lin and H. Dai, *Energy Environ. Sci.*, 2019, **12**, 1317-1325.
231. L. Zhao, Y. Zhang, L. B. Huang, X. Z. Liu, Q. H. Zhang, C. He, Z. Y. Wu, L. J. Zhang, J. Wu, W. Yang, L. Gu, J. S. Hu and L. J. Wan, *Nat. Commun.*, 2019, **10**, 1278.
232. F. Li, S. Hong, T.-S. Wu, X. Li, J. Masa, Y.-L. Soo and Z. Sun, *ACS Appl. Energy Mater.*, 2019, **2**, 8836-8842.
233. D. M. Koshy, S. Chen, D. U. Lee, M. B. Stevens, A. M. Abdellah, S. M. Dull, G. Chen, D. Nordlund, A. Gallo, C. Hahn, D. C. Higgins, Z. Bao and T. F. Jaramillo, *Angew. Chem. Int. Ed.*, 2020, **59**, 4043-4050.
234. S. Liu, H. B. Yang, S. F. Hung, J. Ding, W. Cai, L. Liu, J. Gao, X. Li, X. Ren, Z. Kuang,

- Y. Huang, T. Zhang and B. Liu, *Angew. Chem. Int. Ed.*, 2019, **59**, 798-803.
235. M. Jia, S. Hong, T.-S. Wu, X. Li, Y.-L. Soo and Z. Sun, *Chem. Commun.*, 2019, **55**, 12024-12027.
236. J. Yang, Z. Qiu, C. Zhao, W. Wei, W. Chen, Z. Li, Y. Qu, J. Dong, J. Luo, Z. Li and Y. Wu, *Angew. Chem. Int. Ed.*, 2018, **57**, 14095-14100.
237. B. Zhang, J. Zhang, J. Shi, D. Tan, L. Liu, F. Zhang, C. Lu, Z. Su, X. Tan, X. Cheng, B. Han, L. Zheng and J. Zhang, *Nat. Commun.*, 2019, **10**, 2980.
238. E. Zhang, T. Wang, K. Yu, J. Liu, W. Chen, A. Li, H. Rong, R. Lin, S. Ji, X. Zheng, Y. Wang, L. Zheng, C. Chen, D. Wang, J. Zhang and Y. Li, *J. Am. Chem. Soc.*, 2019, **141**, 16569-16573.
239. Q. He, J. H. Lee, D. Liu, Y. Liu, Z. Lin, Z. Xie, S. Hwang, S. Kattel, L. Song and J. G. Chen, *Adv. Funct. Mater.*, 2020, **30**, 2000407.
240. J. Liu, X. Kong, L. Zheng, X. Guo, X. Liu and J. Shui, *ACS Nano*, 2020, **14**, 1093-1101.
241. Y. F. Li, C. Chen, R. Cao, Z. W. Pan, H. He and K. B. Zhou, *Appl. Catal. B Environ.*, 2020, **268**, 118747.
242. J. Jiao, R. Lin, S. Liu, W.-C. Cheong, C. Zhang, Z. Chen, Y. Pan, J. Tang, K. Wu, S.-F. Hung, H. M. Chen, L. Zheng, Q. Lu, X. Yang, B. Xu, H. Xiao, J. Li, D. Wang, Q. Peng, C. Chen and Y. Li, *Nat. Chem.*, 2019, **11**, 222-228.
243. Z. Miao, P. Hu, C. Nie, H. Xie, W. Fu and Q. Li, *J. Energy Chem.*, 2019, **38**, 114-118.
244. S. Guo, S. Zhao, X. Wu, H. Li, Y. Zhou, C. Zhu, N. Yang, X. Jiang, J. Gao, L. Bai, Y. Liu, Y. Lifshitz, S. T. Lee and Z. Kang, *Nat. Commun.*, 2017, **8**, 1828.
245. X. Zhang, Z. Wu, X. Zhang, L. Li, Y. Li, H. Xu, X. Li, X. Yu, Z. Zhang, Y. Liang and H. Wang, *Nat. Commun.*, 2017, **8**, 14675.
246. M. Jia, Tai-Sing Wu, C. Ma, P. Kang, Q. F. Hengcong Tao, Song Hong, S. Liu, Yun-Liang Soo, J. Q. Z. S. Yousung Jung, *Chem. Sci.*, 2018, **9**, 8775-8780.
247. N. Morlanés, K. Takanabe and V. Rodionov, *ACS Catal.*, 2016, **6**, 3092-3095.
248. Y. Cheng, J.-P. Veder, L. Thomsen, S. Zhao, M. Saunders, R. Demichelis, C. Liu, R. De Marco and S. P. Jiang, *J. Mater. Chem. A*, 2018, **6**, 1370-1375.
249. X.-M. Hu, M. H. Rønne, S. U. Pedersen, T. Skrydstrup and K. Daasbjerg, *Angew. Chem. Int. Ed.*, 2017, **56**, 6468-6472.

250. A. Tatin, C. Comminges, B. Kokoh, C. Costentin, M. Robert and J.-M. Savéant, *P. Nat. Acad. Sci.*, 2016, **113**, 5526-5529.
251. J. Choi, P. Wagner, R. Jalili, J. Kim, D. R. MacFarlane, G. G. Wallace and D. L. Officer, *Adv. Energy Mater.*, 2018, **8**, 1801280.
252. A. Maurin and M. Robert, *J. Am. Chem. Soc.*, 2016, **138**, 2492-2495.
253. M. Wang, L. Chen, T. C. Lau and M. Robert, *Angew. Chem. Int. Ed.*, 2018, **57**, 7769-7773.
254. J. Choi, J. Kim, P. Wagner, S. Gambhir, R. Jalili, S. Byun, S. Sayyar, Y. M. Lee, D. R. MacFarlane, G. G. Wallace and D. L. Officer, *Energy Environ. Sci.*, 2019, **12**, 747-755.
255. C. Lu, J. Yang, S. Wei, S. Bi, Y. Xia, M. Chen, Y. Hou, M. Qiu, C. Yuan, Y. Su, F. Zhang, H. Liang and X. Zhuang, *Adv. Funct. Mater.*, 2019, **29**, 1806884.
256. L. Lin, H. Li, C. Yan, H. Li, R. Si, M. Li, J. Xiao, G. Wang and X. Bao, *Adv. Mater.*, 2019, **31**, 1903470.
257. S. Ren, D. Joulie, D. Salvatore, K. Torbensen, M. Wang, M. Robert and C. P. Berlinguette, *Science*, 2019, **365**, 367-369.
258. L. He, X. Sun, H. Zhang and F. Shao, *Angew. Chem. Int. Ed.*, 2018, **130**, 12633-12637.
259. P. Su, K. Iwase, T. Harada, K. Kamiya and S. Nakanishi, *Chem. Sci.*, 2018, **9**, 3941-3947.
260. S. Dou, J. Song, S. Xi, Y. Du, J. Wang, Z. F. Huang, Z. J. Xu and X. Wang, *Angew. Chem. Int. Ed.*, 2019, **131**, 4081-4085.
261. M. Zhu, J. Chen, L. Huang, R. Ye, J. Xu and Y. F. Han, *Angew. Chem. Int. Ed.*, 2019, **58**, 6595-6599.
262. A. De Riccardis, M. Lee, R. V. Kazantsev, A. J. Garza, G. Zeng, D. M. Larson, E. L. Clark, P. Lobaccaro, P. W. W. Burroughs, E. Bloise, J. W. Ager, A. T. Bell, M. Head-Gordon, G. Mele and F. M. Toma, *ACS Appl. Mater. Interfaces*, 2020, **12**, 5251-5258.
263. J. Du, Z.-L. Lang, Y.-Y. Ma, H.-Q. Tan, B.-L. Liu, Y.-H. Wang, Z.-H. Kang and Y.-G. Li, *Chem. Sci.*, 2020, **11**, 3007-3015.
264. C. He, Y. Zhang, Y. Zhang, L. Zhao, L. P. Yuan, J. Zhang, J. Ma and J. S. Hu, *Angew. Chem. Int. Ed.*, 2020, **132**, 4944-4949.
265. G. Neri, J. J. Walsh, G. Teobaldi, P. M. Donaldson and A. J. Cowan, *Nat. Catal.*, 2018, **1**, 952-959.

266. B. Kumar, M. Asadi, D. Pisasale, S. Sinha-Ray, B. A. Rosen, R. Haasch, J. Abiade, A. L. Yarin and A. Salehi-Khojin, *Nat. Commun.*, 2013, **4**, 2819.
267. J. Xu, Y. Kan, R. Huang, B. Zhang, B. Wang, K. H. Wu, Y. Lin, X. Sun, Q. Li, G. Centi and D. Su, *ChemSusChem*, 2016, **9**, 1085-1089.
268. J. Wu, M. Liu, P. P. Sharma, R. M. Yadav, L. Ma, Y. Yang, X. Zou, X.-D. Zhou, R. Vajtai and B. I. Yakobson, *Nano Lett.*, 2015, **16**, 466-470.
269. J. Wu, R. M. Yadav, M. Liu, P. P. Sharma, C. S. Tiwary, L. Ma, X. Zou, X.-D. Zhou, B. I. Yakobson and J. Lou, *ACS Nano*, 2015, **9**, 5364-5371.
270. P. P. Sharma, J. Wu, R. M. Yadav, M. Liu, C. J. Wright, C. S. Tiwary, B. I. Yakobson, J. Lou, P. M. Ajayan and X.-D. Zhou, *Angew. Chem. Int. Ed.*, 2015, **54**, 13701-13705.
271. H.-R. M. Jhong, C. E. Tornow, B. Smid, A. A. Gewirth, S. M. Lyth and P. J. A. Kenis, *ChemSusChem*, 2017, **10**, 1094-1099.
272. B. Zhang, T.-J. Zhao, W.-J. Feng, Y.-X. Liu, H.-H. Wang, H. Su, L.-B. Lv, X.-H. Li and J.-S. Chen, *Nano Res.*, 2018, **11**, 2450-2459.
273. F. Li, M. Xue, G. P. Knowles, L. Chen, D. R. MacFarlane and J. Zhang, *Electrochim. Acta*, 2017, **245**, 561-568.
274. X. Cui, Z. Pan, L. Zhang, H. Peng and G. Zheng, *Adv. Energy Mater.*, 2017, **7**, 1701456.
275. R. Wang, X. Sun, S. Ould-Chikh, D. Osadchii, F. Bai, F. Kapteijn and J. Gascon, *ACS Appl. Mater. Interfaces*, 2018, **10**, 14751-14758.
276. J. Xie, X. Zhao, M. Wu, Q. Li, Y. Wang and J. Yao, *Angew. Chem. Int. Ed.*, 2018, **57**, 9640-9644.
277. F. Pan, B. Li, X. Xiang, G. Wang and Y. Li, *ACS Catal.*, 2019, **9**, 2124-2133.
278. W. Ni, Y. Xue, X. Zang, C. Li, H. Wang, Z. Yang and Y. M. Yan, *ACS Nano*, 2020, **14**, 2014-2023.
279. S. Liu, H. B. Yang, X. Huang, L. H. Liu, W. Z. Cai, J. J. Gao, X. N. Li, T. Zhang, Y. Q. Huang and B. Liu, *Adv. Funct. Mater.*, 2018, **28**, 1800499.
280. X. Zhu, C. Tian, H. Wu, Y. He, L. He, H. Wang, X. Zhuang, H. Liu, C. Xia and S. Dai, *ACS Appl. Mater. Interf.*, 2018, **10**, 43588-43594.
281. M. Kuang, A. Guan, Z. Gu, P. Han, L. Qian and G. Zheng, *Nano Res.*, 2019, **12**, 2324-2329.

282. C. Li, Y. Wang, N. Xiao, H. Li, Y. Ji, Z. Guo, C. Liu and J. Qiu, *Carbon*, 2019, **151**, 46-52.
283. C. Ma, P. Hou, X. Wang, Z. Wang, W. Li and P. Kang, *Appl. Catal. B Environ.*, 2019, **250**, 347-354.
284. N. Meng, W. Zhou, Y. Yu, Y. Liu and B. Zhang, *ACS Catal.*, 2019, **9**, 10983-10989.
285. F. Pan, B. Li, W. Deng, Z. Du, Y. Gang, G. Wang and Y. Li, *Appl. Catal. B Environ.*, 2019, **252**, 240-249.
286. W. Wang, L. Shang, G. Chang, C. Yan, R. Shi, Y. Zhao, G. I. N. Waterhouse, D. Yang and T. Zhang, *Adv. Mater.*, 2019, **31**, 1808276.
287. P. Yao, Y. Qiu, T. Zhang, P. Su, X. Li and H. Zhang, *ACS Sustain. Chem. Eng.*, 2019, **7**, 5249-5255.
288. H. Li, N. Xiao, M. Hao, X. Song, Y. Wang, Y. Ji, C. Liu, C. Li, Z. Guo, F. Zhang and J. Qiu, *Chem. Eng. J.* 2018, **351**, 613-621.
289. B. Zhang, J. Zhang, F. Zhang, L. Zheng, G. Mo, B. Han and G. Yang, *Adv. Funct. Mater.*, 2019, **30**, 1906194.
290. Y. Zheng, P. Cheng, J. Xu, J. Han, D. Wang, C. Hao, H. R. Alanagh, C. Long, X. Shi and Z. Tang, *Nanoscale*, 2019, **11**, 4911-4917.
291. Y. Zhu, K. L. Lv, X. P. Wang, H. Q. Yang and G. Z. Xiao, *J. Mater. Chem. A*, 2019, **7**, 14895-14903.
292. H. Yang, Y. Wu, Q. Lin, L. Fan, X. Chai, Q. Zhang, J. Liu, C. He and Z. Lin, *Angew. Chem. Int. Ed.*, 2018, **57**, 15476-15480.
293. W. Li, M. Seredych, E. Rodriguez-Castellon and T. J. Bandosz, *ChemSusChem*, 2016, **9**, 606-616.
294. X. Cai, B. Qin, Y. Li, Q. Zhang, G. Yang, H. Wang, Y. Cao, H. Yu and F. Peng, *ChemElectroChem*, 2020, **7**, 320-327.
295. H. Han, S. Park, D. Jang, S. Lee and W. B. Kim, *ChemSusChem*, 2020, **13**, 539-547.
296. G. Wang, M. Liu, J. Jia, H. Xu, B. Zhao, K. Lai, C. Tu and Z. Wen, *ChemCatChem*, 2020, **12**, 2203-2208.
297. C. Chen, X. Sun, X. Yan, Y. Wu, H. Liu, Q. Zhu, B. B. A. Bediako and B. Han, *Angew. Chem. Int. Ed.*, 2020, **132**, 11216-11222.

298. M. Chen, S. Wang, H. Zhang, P. Zhang, Z. Tian, M. Lu, X. Xie, L. Huang and W. Huang, *Nano Res.*, 2020, **13**, 729–735.
299. N. Wanninayake, Q. Ai, R. Zhou, M. A. Hoque, S. Herrell, M. I. Guzman, C. Risko and D. Y. Kim, *Carbon*, 2020, **157**, 408-419.
300. Q. Wu, J. Gao, J. Feng, Q. Liu, Y. Zhou, S. Zhang, M. Nie, Y. Liu, J. Zhao, F. Liu, J. Zhong and Z. Kang, *J. Mater. Chem. A*, 2020, **8**, 1205-1211.
301. L. Ye, Y. Ying, D. Sun, Z. Zhang, L. Fei, Z. Wen, J. Qiao and H. Huang, *Angew. Chem. Int. Ed.*, 2020, **59**, 3244-3251.
302. G. S. Prakash, F. A. Viva and G. A. Olah, *J. Power Sources*, 2013, **223**, 68-73.
303. Q. Wang, H. Dong and H. Yu, *J. Power Sources*, 2014, **271**, 278-284.
304. J. Wu, P. P. Sharma, B. H. Harris and X.-D. Zhou, *J. Power Sources*, 2014, **258**, 189-194.
305. F. Lei, W. Liu, Y. Sun, J. Xu, K. Liu, L. Liang, T. Yao, B. Pan, S. Wei and Y. Xie, *Nat. Commun.*, 2016, **7**, 12697.
306. Q. Zhu, J. Ma, X. Kang, X. Sun, H. Liu, J. Hu, Z. Liu and B. Han, *Angew. Chem. Int. Ed.*, 2016, **55**, 9012-9016.
307. S. Zhang, P. Kang and T. J. Meyer, *J. Am. Chem. Soc.*, 2014, **136**, 1734-1737.
308. Y. Yiliguma, Z. Wang, C. Yang, A. Guan, L. Shang, A. M. Al-Enizi, L. Zhang and G. Zheng, *J. Mater. Chem. A*, 2018, **6**, 20121-20127.
309. C. L. Liang, B. Kim, S. Z. Yang, Y. Liu, C. F. Woellner, Z. Y. Li, R. Vajtai, W. Yang, J. J. Wu, P. J. A. Kenis and P. M. Ajayan, *J. Mater. Chem. A*, 2018, **6**, 10313-10319.
310. W. Deng, L. Zhang, L. Li, S. Chen, C. Hu, Z. J. Zhao, T. Wang and J. Gong, *J. Am. Chem. Soc.*, 2019, **141**, 2911-2915.
311. C. Hu, L. Zhang, L. Li, W. Zhu, W. Deng, H. Dong, Z.-J. Zhao and J. Gong, *Sci. China-Chem.*, 2019, **62**, 1030-1036.
312. J. Huang, X. Guo, X. Huang and L. Wang, *Electrochim. Acta*, 2019, **325**, 134923.
313. Z. Chen, S. Yao and L. Liu, *J. Mater. Chem. A*, 2017, **5**, 24651-24656.
314. F. Li, L. Chen, M. Xue, T. Williams, Y. Zhang, D. R. MacFarlane and J. Zhang, *Nano Energy*, 2017, **31**, 270-277.
315. L. Lu, X. Sun, J. Ma, Q. Zhu, C. Wu, D. Yang and B. Han, *Sci. China-Chem.*, 2018, **61**, 228-235.

316. J. Huang, X. Guo, Y. Wei, Q. Hu, X. Yu and L. Wang, *J. CO<sub>2</sub> Util.*, 2019, **33**, 166-170.
317. C. Hu, L. Li, W. Deng, G. Zhang, W. Zhu, X. Yuan, L. Zhang, Z. J. Zhao and J. Gong, *ChemSusChem*, 2020, DOI: 10.1002/cssc.202000557.
318. C. Zhao and J. Wang, *Chem. Eng. J.*, 2016, **293**, 161-170.
319. Y. Chen and M. W. Kanan, *J. Am. Chem. Soc.*, 2012, **134**, 1986-1989.
320. W. Lee, Y. E. Kim, M. H. Youn, S. K. Jeong and K. T. Park, *Angew. Chem. Int. Ed.*, 2018, **57**, 6883-6887.
321. J. Wu, F. G. Risalvato, S. Ma and X.-D. Zhou, *J. Mater. Chem. A*, 2014, **2**, 1647-1651.
322. Q. Lai, W. Yuan, W. Huang and G. Yuan, *Appl. Surf. Sci.*, 2020, **508**, 145221.
323. B. Zhang, Z. Guo, Z. Zuo, W. Pan and J. Zhang, *Appl. Catal. B Environ.*, 2018, **239**, 441-449.
324. X. Zu, X. Li, W. Liu, Y. Sun, J. Xu, T. Yao, W. Yan, S. Gao, C. Wang, S. Wei and Y. Xie, *Adv. Mater.*, 2019, **31**, e1808135.
325. H. Li, N. Xiao, Y. Wang, C. Liu, S. Zhang, H. Zhang, J. Bai, J. Xiao, C. Li, Z. Guo, S. Zhao and J. Qiu, *J. Mater. Chem. A*, 2020, **8**, 1779-1786.
326. D. H. Won, C. H. Choi, J. Chung, M. W. Chung, E.-H. Kim and S. I. Woo, *ChemSusChem*, 2015, **8**, 3092-3098.
327. Y. Zhang, X. Zhang, A. M. Bond and J. Zhang, *Phys. Chem. Chem. Phys.*, 2018, **20**, 5936-5941.
328. B. Kumar, V. Atla, J. P. Brian, S. Kumari, T. Q. Nguyen, M. Sunkara and J. M. Spurgeon, *Angew. Chem. Int. Ed.*, 2017, **56**, 3645-3649.
329. R. Daiyan, X. Lu, W. H. Saputera, Y. H. Ng and R. Amal, *ACS Sustain. Chem. Eng.*, 2018, **6**, 1670-1679.
330. D. Li, J. Wu, T. Liu, J. Liu, Z. Yan, L. Zhen and Y. Feng, *Chem. Eng. J.*, 2019, **375**, 122024.
331. T. Gao, A. Kumar, Z. Shang, X. Duan, H. Wang, S. Wang, S. Ji, D. Yan, L. Luo, W. Liu and X. Sun, *Chin. Chem. Lett.*, 2019, **30**, 2274-2278.
332. N. Han, Y. Wang, J. Deng, J. Zhou, Y. Wu, H. Yang, P. Ding and Y. Li, *J. Mater. Chem. A*, 2019, **7**, 1267-1272.
333. S. Liu, J. Xiao, X. F. Lu, J. Wang, X. Wang and X. W. D. Lou, *Angew. Chem. Int. Ed.*,



- 2019, **58**, 8499-8503.
334. X. Zhang, Z. Chen, K. Mou, M. Jiao, X. Zhang and L. Liu, *Nanoscale*, 2019, **11**, 18715-18722.
335. F. Li, L. Chen, G. P. Knowles, D. R. MacFarlane and J. Zhang, *Angew. Chem. Int. Ed.*, 2017, **56**, 505-509.
336. Q. Zhang, Y. Zhang, J. Mao, J. Liu, Y. Zhou, D. Guay and J. Qiao, *ChemSusChem*, 2019, **12**, 1443-1450.
337. Z. Chen, X. Zhang, M. Jiao, K. Mou, X. Zhang and L. Liu, *Adv. Energy Mater.*, 2020, **10**, 1903664.
338. Y. Fu, T. Wang, W. Zheng, C. Lei, B. Yang, J. Chen, Z. Li, L. Lei, C. Yuan and Y. Hou, *ACS Appl. Mater. Interfaces*, 2020, **12**, 16178-16185.
339. L. Fan, Z. Xia, M. Xu, Y. Lu and Z. Li, *Adv. Funct. Mater.*, 2018, **28**, 1706289.
340. R. Daiyan, E. C. Lovell, N. M. Bedford, W. H. Saputera, K. H. Wu, S. Lim, J. Horlyck, Y. H. Ng, X. Lu and R. Amal, *Adv. Sci.*, 2019, **6**, 1900678.
341. A. Zhang, R. He, H. Li, Y. Chen, T. Kong, K. Li, H. Ju, J. Zhu, W. Zhu and J. Zeng, *Angew. Chem. Int. Ed.*, 2018, **57**, 10954-10958.
342. T. Yuan, Z. Hu, Y. Zhao, J. Fang, J. Lv, Q. Zhang, Z. Zhuang, L. Gu and S. Hu, *Nano Lett*, 2020, **20**, 2916-2922.
343. Y. Pi, J. Guo, Q. Shao and X. Huang, *Nano Energy*, 2019, **62**, 861-868.
344. B. He, L. Jia, Y. Cui, W. Zhou, J. Sun, J. Xu, Q. Wang and L. Zhao, *ACS Appl. Energy Mater.*, 2019, **2**, 7655-7662.
345. Y. He, W.-J. Jiang, Y. Zhang, L.-B. Huang and J.-S. Hu, *J. Mater. Chem. A*, 2019, **7**, 18428-18433.
346. S. Huo, Z. Weng, Z. Wu, Y. Zhong, Y. Wu, J. Fang and H. Wang, *ACS Appl. Mater. Interfaces*, 2017, **9**, 28519-28526.
347. C. Chen, Y. Pang, F. Zhang, J. Zhong, B. Zhang and Z. Cheng, *J. Mater. Chem. A*, 2018, **6**, 19621-19630.
348. X. Hou, Y. Cai, D. Zhang, L. Li, X. Zhang, Z. Zhu, L. Peng, Y. Liu and J. Qiao, *J. Mater. Chem. A*, 2019, **7**, 3197-3205.
349. X. Jiang, X. Wang, Z. Liu, Q. Wang, X. Xiao, H. Pan, M. Li, J. Wang, Y. Shao, Z. Peng,

- Y. Shen and M. Wang, *Appl. Catal. B Environ.*, 2019, **259**, 118040.
350. J. Wang, J. Zou, X. Hu, S. Ning, X. Wang, X. Kang and S. Chen, *J. Mater. Chem. A*, 2019, **7**, 27514-27521.
351. J. Wang, Y. Ji, Q. Shao, R. Yin, J. Guo, Y. Li and X. Huang, *Nano Energy*, 2019, **59**, 138-145.
352. L. Peng, Y. Wang, I. Masood, B. Zhou, Y. Wang, J. Lin, J. Qiao and F.-Y. Zhang, *Appl. Catal. B Environ.*, 2020, **62**, 861-868.
353. Y. Wei, J. Liu, F. Cheng and J. Chen, *J. Mater. Chem. A*, 2019, **7**, 19651-19656.
354. D. X. Yang, Q. G. Zhu, X. F. Sun, C. J. Chen, L. Lu, W. W. Guo, Z. M. Liu and B. X. Han, *Green Chem.*, 2018, **20**, 3705-3710.
355. A. W. Kahsay, K. B. Ibrahim, M.-C. Tsai, M. K. Birhanu, S. A. Chala, W.-N. Su and B.-J. Hwang, *Catal. Lett.*, 2019, **149**, 860-869.
356. J. Li, Y. Kuang, Y. Meng, X. Tian, W. H. Hung, X. Zhang, A. Li, M. Xu, W. Zhou, C. S. Ku, C. Y. Chiang, G. Zhu, J. Guo, X. Sun and H. Dai, *J. Am. Chem. Soc.*, 2020, **142**, 7276-7282.
357. W. Luc, C. Collins, S. Wang, H. Xin, K. He, Y. Kang and F. Jiao, *J. Am. Chem. Soc.*, 2017, **139**, 1885-1893.
358. R. He, X. Yuan, P. Shao, T. Duan and W. Zhu, *Small*, 2019, **15**, 1904882.
359. Y. W. Choi, F. Scholten, I. Sinev and B. Roldan Cuenya, *J. Am. Chem. Soc.*, 2019, **141**, 5261-5266.
360. X. Zhang, F. Li, Y. Zhang, A. M. Bond and J. Zhang, *J. Mater. Chem. A*, 2018, **6**, 7851-7858.
361. X. Zheng, Y. Ji, J. Tang, J. Wang, B. Liu, H.-G. Steinrück, K. Lim, Y. Li, M. F. Toney, K. Chan and Y. Cui, *Nat. Catal.*, 2018, **2**, 55-61.
362. G. B. Wen, D. U. Lee, B. H. Ren, F. M. Hassan, G. P. Jiang, Z. P. Cano, J. Gostick, E. Croiset, Z. Y. Bai, L. Yang and Z. W. Chen, *Adv. Energy Mater.*, 2018, **8**, 1802427.
363. V. S. S. Mosali, X. Zhang, Y. Zhang, T. Gengenbach, S.-X. Guo, G. Puxty, M. D. Horne, A. M. Bond and J. Zhang, *ACS Sustain. Chem. Eng.*, 2019, **7**, 19453-19462.
364. P. Han, Z. J. Wang, M. Kuang, Y. F. Wang, J. N. Liu, L. F. Hu, L. P. Qian and G. F. Zheng, *Adv. Energy Mater.*, 2018, **8**, 1801230.

365. Z. Bitar, A. Fecant, E. Trela-Baudot, S. Chardon-Noblat and D. Pasquier, *Appl. Catal. B Environ.*, 2016, **189**, 172-180.
366. F. Koleli, T. Atilan, N. Palamut, A. M. Gizir, R. Aydin and C. H. Hamann, *J. Appl. Electrochem.*, 2003, **33**, 447-450.
367. Y. Kwon and J. Lee, *Electrocatalysis*, 2010, **1**, 108-115.
368. Z. He, J. Shen, Z. Ni, J. Tang, S. Song, J. Chen and L. Zhao, *Catal. Commun.*, 2015, **72**, 38-42.
369. C. H. Lee and M. W. Kanan, *ACS Catal.*, 2015, **5**, 465-469.
370. H. Wu, J. Song, C. Xie, Y. Hu, J. Ma, Q. Qian and B. Han, *Green Chem.*, 2018, **20**, 4602-4606.
371. M. Y. Fan, S. Garbarino, G. A. Botton, A. C. Tavares and D. Guay, *J. Mater. Chem. A*, 2017, **5**, 20747-20756.
372. J. E. Pander, III, J. W. J. Lum and B. S. Yeo, *J. Mater. Chem. A*, 2019, **7**, 4093-4101.
373. H. Wang, Z. Liang, M. Tang, G. Chen, Y. Li, W. Chen, D. Lin, Z. Zhang, G. Zhou, J. Li, Z. Lu, K. Chan, T. Tan and Y. Cui, *Joule*, 2019, **3**, 1927-1936.
374. Y. F. Xing, M. Cui, P. F. Fan, J. J. Ren, C. Zhang, N. Li, X. F. Wen and X. P. Ji, *Mater. Chem. Phys.*, 2019, **237**, 121826.
375. Z. Zhang, C. Liu, J. T. Brosnahan, H. Zhou, W. Xu and S. Zhang, *J. Mater. Chem. A*, 2019, **7**, 23775-23780.
376. X. Lu, Y. Wu, X. Yuan and H. Wang, *Angew. Chem. Int. Ed.*, 2019, **58**, 4031-4035.
377. J. H. Koh, D. H. Won, T. Eom, N. K. Kim, K. D. Jung, H. Kim, Y. J. Hwang and B. K. Min, *ACS Catal.*, 2017, **7**, 5071-5077.
378. C. Zhu, Q. Wang and C. Wu, *J. CO2 Util.*, 2020, **36**, 96-104.
379. S. Kim, W. J. Dong, S. Gim, W. Sohn, J. Y. Park, C. J. Yoo, H. W. Jang and J.-L. Lee, *Nano Energy*, 2017, **39**, 44-52.
380. C. W. Lee, J. S. Hong, K. D. Yang, K. Jin, J. H. Lee, H.-Y. Ahn, H. Seo, N.-E. Sung and K. T. Nam, *ACS Catal.*, 2018, **8**, 931-937.
381. X. Zhang, T. Lei, Y. Liu and J. Qiao, *Appl. Catal. B Environ.*, 2017, **218**, 46-50.
382. N. Han, Y. Wang, H. Yang, J. Deng, J. Wu, Y. Li and Y. Li, *Nat. Commun.*, 2018, **9**, 1320.

383. Q. Wang, M. Ma, S. Zhang, K. Lu, L. Fu, X. Liu and Y. Chen, *ChemPlusChem*, 2020, **85**, 672-678.
384. F. P. Garcia de Arquer, O. S. Bushuyev, P. De Luna, C. T. Dinh, A. Seifitokaldani, M. I. Saidaminov, C. S. Tan, L. N. Quan, A. Proppe, M. G. Kibria, S. O. Kelley, D. Sinton and E. H. Sargent, *Adv. Mater.*, 2018, **30**, 1802858.
385. P. Su, W. Xu, Y. Qiu, T. Zhang, X. Li and H. Zhang, *ChemSusChem*, 2018, **11**, 848-853.
386. Y. Zhang, F. Li, X. Zhang, T. Williams, C. D. Easton, A. M. Bond and J. Zhang, *J. Mater. Chem. A*, 2018, **6**, 4714-4720.
387. Y. Zhang, X. Zhang, Y. Ling, F. Li, A. M. Bond and J. Zhang, *Angew. Chem. Int. Ed.*, 2018, **57**, 13283-13287.
388. M. Zhao, Y. Gu, W. Gao, P. Cui, H. Tang, X. Wei, H. Zhu, G. Li, S. Yan, X. Zhang and Z. Zou, *Appl. Catal. B Environ.*, 2020, **266**, 118625.
389. P. F. Liu, M. Y. Zu, L. R. Zheng and H. G. Yang, *Chem. Commun.*, 2019, **55**, 12392-12395.
390. S. X. Guo, Y. Zhang, X. Zhang, C. D. Easton, D. R. MacFarlane and J. Zhang, *ChemSusChem*, 2019, **12**, 1091-1100.
391. Q. Gong, P. Ding, M. Xu, X. Zhu, M. Wang, J. Deng, Q. Ma, N. Han, Y. Zhu, J. Lu, Z. Feng, Y. Li, W. Zhou and Y. Li, *Nat. Commun.*, 2019, **10**, 2807.
392. S. Liu, X. F. Lu, J. Xiao, X. Wang and X. W. Lou, *Angew. Chem. Int. Ed.*, 2019, **58**, 13828-13833.
393. P. Lu, D. Gao, H. He, Q. Wang, Z. Liu, S. Dipazir, M. Yuan, W. Zu and G. Zhang, *Nanoscale*, 2019, **11**, 7805-7812.
394. Z. Chen, K. Mou, X. Wang and L. Liu, *Angew. Chem. Int. Ed.*, 2018, **57**, 12790-12794.
395. F. L. Meng, Q. Zhang, K. H. Liu and X. B. Zhang, *Chemistry*, 2019, **26**, 4013-4018.
396. T. Tran - Phu, R. Daiyan, Z. Fusco, Z. Ma, R. Amal and A. Tricoli, *Adv. Funct. Mater.*, 2019, **30**, 1906478.
397. P. Deng, F. Yang, Z. Wang, S. Chen, Y. Zhou, S. Zaman and B. Y. Xia, *Angew. Chem. Int. Ed.*, 2020, **59**, 10807-10813.
398. X. Yang, P. Deng, D. Liu, S. Zhao, D. Li, H. Wu, Y. Ma, B. Y. Xia, M. Li, C. Xiao and S. Ding, *J. Mater. Chem. A*, 2020, **8**, 2472-2480.

399. P. Deng, H. Wang, R. Qi, J. Zhu, S. Chen, F. Yang, L. Zhou, K. Qi, H. Liu and B. Y. Xia, *ACS Catal.*, 2020, **10**, 743-750.
400. D. Wu, X. Shen, J. Liu, C. Wang, Y. Liang, X. Z. Fu and J. L. Luo, *Nanoscale*, 2019, **11**, 22125-22133.
401. F. Yang, A. O. Elnabawy, R. Schimmenti, P. Song, J. Wang, Z. Peng, S. Yao, R. Deng, S. Song, Y. Lin, M. Mavrikakis and W. Xu, *Nat. Commun.*, 2020, **11**, 1088.
402. Y. X. Duan, K. H. Liu, Q. Zhang, J. M. Yan and Q. Jiang, *Small Methods*, 2020, **4**, 1900846.
403. D. Wu, W. Chen, X. Wang, X.-Z. Fu and J.-L. Luo, *J. CO2 Util.*, 2020, **37**, 353-359.
404. D. B. Zhang, Z. T. Tao, F. L. Feng, B. B. He, W. Zhou, J. Sun, J. M. Xu, Q. Wang and L. Zhao, *Electrochim. Acta*, 2020, **334**, 135563
405. X. Zhang, X. Sun, S.-X. Guo, A. M. Bond and J. Zhang, *Energy Environ. Sci.*, 2019, **12**, 1334-1340.
406. Meng Yang Zu, Le Zhang, Chongwu Wang, L. R. Zheng, a. H. G. Yang and *J. Mater. Chem. A*, 2018, **6**, 16804-16809..
407. L. Jia, H. Yang, J. Deng, J. Chen, Y. Zhou, P. Ding, L. Li, N. Han and Y. Li, *Chinese J. Chem.*, 2019, **37**, 497-500.
408. J.-H. Zhou, K. Yuan, L. Zhou, Y. Guo, M.-Y. Luo, X.-Y. Guo, Q.-Y. Meng and Y.-W. Zhang, *Angew. Chem. Int. Ed.*, 2019, **58**, 14197-14201.
409. X. An, S. Li, A. Yoshida, T. Yu, Z. Wang, X. Hao, A. Abudula and G. Guan, *ACS Appl. Mater. Interfaces*, 2019, **11**, 42114-42122.
410. Q. Li, X. Zhang, X. Zhou, Q. Li, H. Wang, J. Yi, Y. Liu and J. Zhang, *J. CO2 Util.*, 2020, **37**, 106-112.
411. P. Lamagni, M. Miola, J. Catalano, M. S. Hvid, M. A. H. Mamakhel, M. Christensen, M. R. Madsen, H. S. Jeppesen, X. M. Hu, K. Daasbjerg, T. Skrydstrup and N. Lock, *Adv. Funct. Mater.*, 2020, **30**, 1910408.
412. R. Kortlever, I. Peters, S. Koper and M. T. Koper, *ACS Catal.*, 2015, **5**, 3916-3923.
413. A. Klinkova, P. D. Luna, C.-T. Dinh, O. Voznyy, E. M. Larin, E. Kumacheva and E. H. Sargent, *ACS Catal.*, 2016, **6**, 8115-8120.
414. J. Xie, X. Wang, J. Lv, Y. Huang, M. Wu, Y. Wang and J. Yao, *Angew. Chem. Int. Ed.*,

- 2018, **57**, 16996-17001.
415. B. Jiang, X.-G. Zhang, K. Jiang, D.-Y. Wu and W.-B. Cai, *J. Am. Chem. Soc.*, 2018, **140**, 2880-2889.
416. J. J. Humphrey, D. Plana, V. Celorrio, S. Sadasivan, R. P. Tooze, P. Rodríguez and D. J. Fermín, *ChemCatChem*, 2016, **8**, 952-960.
417. J. Li, S.-X. Guo, F. Li, F. Li, X. Zhang, J. Ma, D. R. MacFarlane, A. M. Bond and J. Zhang, *ChemSusChem*, 2019, **12**, 4506-4515.
418. S. Gao, X. Jiao, Z. Sun, W. Zhang, Y. Sun, C. Wang, Q. Hu, X. Zu, F. Yang and S. Yang, *Angew. Chem. Int. Ed.*, 2016, **55**, 698-702.
419. S. Gao, Y. Lin, X. Jiao, Y. Sun, Q. Luo, W. Zhang, D. Li, J. Yang and Y. Xie, *Nature*, 2016, **529**, 68-71.
420. S. Gao, Z. Sun, W. Liu, X. Jiao, X. Zu, Q. Hu, Y. Sun, T. Yao, W. Zhang, S. Wei and Y. Xie, *Nat. Commun.*, 2017, **8**, 14503.
421. Q. Zhang, A. He, Y. Yang, J. Du, Z. Liu and C. Tao, *J. Mater. Chem. A*, 2019, **7**, 24337-24346.
422. Z. Xia, M. Freeman, D. Zhang, B. Yang, L. Lei, Z. Li and Y. Hou, *ChemElectroChem*, 2018, **5**, 253-259.
423. W. Luo, W. Xie, M. Li, J. Zhang and A. Zuttel, *J. Mater. Chem. A*, 2019, **7**, 4505-4515.
424. J. Zhang, R. Yin, Q. Shao, T. Zhu and X. Huang, *Angew. Chem. Int. Ed.*, 2019, **58**, 5609-5613.
425. W. Ma, S. Xie, X. G. Zhang, F. Sun, J. Kang, Z. Jiang, Q. Zhang, D. Y. Wu and Y. Wang, *Nat. Commun.*, 2019, **10**, 892.
426. L. Liu, H. Gao, J. Feng, J. Feng, S. Zeng, H. Dong, Y. Bai, L. Liu and X. Zhang, *ChemCatchem*, 2020, **12**, 926-931.
427. X. Yuan, Y. Luo, B. Zhang, C. Dong, J. Lei, F. Yi, T. Duan, W. Zhu and R. He, *Chem. Commun.*, 2020, **56**, 4212-4215.
428. Z. Zhang, F. Ahmad, W. Zhao, W. Yan, W. Zhang, H. Huang, C. Ma and J. Zeng, *Nano Lett.*, 2019, **19**, 4029-4034.
429. X. Wang, X. Jiang, Q. Wang, T. Zhang, P. Li, M. Wang and Y. Shen, *Electrochim. Acta*, 2020, **340**, 135948.

430. F. Li, M. Xue, J. Li, X. Ma, L. Chen, X. Zhang, D. R. MacFarlane and J. Zhang, *Angew. Chem. Int. Ed.*, 2017, **56**, 14718-14722.
431. G. Yin, H. Abe, R. Kodiyath, S. Ueda, N. Srinivasan, A. Yamaguchi and M. Miyauchi, *J. Mater. Chem. A*, 2017, **5**, 12113-12119.
432. W. J. Dong, C. J. Yoo and J.-L. Lee, *ACS Appl. Mater. Interfaces*, 2017, **9**, 43575-43582.
433. S. Y. Choi, S. K. Jeong, H. J. Kim, I.-H. Baek and K. T. Park, *ACS Sustain. Chem. Eng.*, 2016, **4**, 1311-1318.
434. Z. B. Hoffman, T. S. Gray, K. B. Moraveck, T. B. Gunnoe and G. Zangari, *ACS Catal.*, 2017, **7**, 5381-5390.
435. T. Li, H. Wei, T. Liu, G. Zheng, S. Liu and J. L. Luo, *ACS Appl. Mater. Interfaces*, 2019, **11**, 22346-22351.
436. I. S. Kwon, T. T. Debela, I. H. Kwak, H. W. Seo, K. Park, D. Kim, S. J. Yoo, J.-G. Kim, J. Park and H. S. Kang, *J. Mater. Chem. A*, 2019, **7**, 22879-22883.
437. Y.-X. Duan, F.-L. Meng, K.-H. Liu, S.-S. Yi, S.-J. Li, J.-M. Yan and Q. Jiang, *Adv. Mat.*, 2018, **30**, e1706194-e1706194.
438. S. Shen, J. He, X. Peng, W. Xi, L. Zhang, D. Xi, L. Wang, X. Liu and J. Luo, *J. Mater. Chem. A*, 2018, **6**, 18960-18966.
439. Z. Chen, N. Wang, S. Yao and L. Liu, *J. CO<sub>2</sub> Util.*, 2017, **22**, 191-196.
440. T. Shinagawa, G. O. Larrazábal, A. J. Martín, F. Krumeich and J. Pérez-Ramírez, *ACS Catal.*, 2018, **8**, 837-844.
441. Y. Deng, Y. Huang, D. Ren, A. D. Handoko, Z. W. Seh, P. Hirunsit and B. S. Yeo, *ACS Appl. Mater. Interfaces*, 2018, **10**, 28572-28581.
442. Y. Huang, Y. Deng, A. D. Handoko, G. K. L. Goh and B. S. Yeo, *ChemSusChem*, 2018, **11**, 320-326.
443. Z. Pan, K. Wang, K. Ye, Y. Wang, H.-Y. Su, B. Hu, J. Xiao, T. Yu, Y. Wang and S. Song, *ACS Catal.*, 2020, **10**, 3871-3880.
444. W. He, I. Liberman, I. Rozenberg, R. Ifraemov and I. Hod, *Angew. Chem. Int. Ed.*, 2020, **132**, 39-8346.
445. Q. Zhu, D. Yang, H. Liu, X. Sun, C. Chen, J. Bi, J. Liu, H. Wu and B. Han, *Angew. Chem. Int. Ed.*, 2020, **59**, 8896-8901.

446. Z. Tao, Z. Wu, X. Yuan, Y. Wu and H. Wang, *ACS Catal.*, 2019, **9**, 10894-10898.
447. W. Ni, C. Li, X. Zang, M. Xu, S. Huo, M. Liu, Z. Yang and Y.-M. Yan, *Appl. Catal. B Environ.*, 2019, **259**, 118044.
448. X. Sun, L. Lu, Q. Zhu, C. Wu, D. Yang, C. Chen and B. Han, *Angew. Chem. Int. Ed.*, 2018, **130**, 2451-2455.
449. T. N. Huan, P. Simon, G. Rousse, I. Genois, V. Artero and M. Fontecave, *Chem. Sci.*, 2017, **8**, 742-747.
450. S. Sen, D. Liu and G. T. R. Palmore, *ACS Catal.*, 2014, **4**, 3091-3095.
451. J. Qiao, M. Fan, Y. Fu, Z. Bai, C. Ma, Y. Liu and X.-D. Zhou, *Electrochim. Acta*, 2015, **153**, 559-565.
452. J.-F. Xie, Y.-X. Huang, W.-W. Li, X.-N. Song, L. Xiong and H.-Q. Yu, *Electrochim. Acta*, 2014, **139**, 137-144.
453. D. Li, T. Liu, Z. Yan, L. Zhen, J. Liu, J. Wu and Y. Feng, *ACS Appl. Mater. Interfaces*, 2020, **12**, 7030-7037.
454. P. Huang, S. Ci, G. Wang, J. Jia, J. Xu and Z. Wen, *J. CO2 Util.*, 2017, **20**, 27-33.
455. Q. Li, W. Zhu, J. Fu, H. Zhang, G. Wu and S. Sun, *Nano Energy*, 2016, **24**, 1-9.
456. H. P. Yang, Q. Lin, H. W. Zhang, G. D. Li, L. D. Fan, X. Y. Chai, Q. L. Zhang, J. H. Liu and C. X. He, *Chem. Commun.*, 2018, **54**, 4108-4111.
457. H. Wang, J. Jia, P. Song, Q. Wang, D. Li, S. Min, C. Qian, L. Wang, Y. F. Li, C. Ma, T. Wu, J. Yuan, M. Antonietti and G. A. Ozin, *Angew. Chem. Int. Ed.*, 2017, **56**, 7847-7852.
458. S. Zhang, P. Kang, S. Ubnoske, M. K. Brennaman, N. Song, R. L. House, J. T. Glass and T. J. Meyer, *J. Am. Chem. Soc.*, 2014, **136**, 7845-7848.
459. H. X. Wang, Y. B. Chen, X. L. Hou, C. Y. Ma and T. W. Tan, *Green Chem.*, 2016, **18**, 3250-3256.
460. N. Sreekanth, M. A. Nazrulla, T. V. Vineesh, K. Sailaja and K. L. Phani, *Chem. Commun.*, 2015, **51**, 16061-16064.
461. K. Natsui, H. Iwakawa, N. Ikemiya, K. Nakata and Y. Einaga, *Angew. Chem. Int. Ed.*, 2018, **57**, 2639-2643.
462. Y. Cao, Z. Geng, W. Chen, F. Cai, G. Wang, Z. Wang and J. Zeng, *Chem. Commun.*, 2018, **54**, 3367-3370.



463. Z. P. Chen, K. W. Mou, S. Y. Yao and L. C. Liu, *J. Mater. Chem. A*, 2018, **6**, 11236-11243.
464. J. Huang and L. Wang, *Electrochim. Acta*, 2019, **319**, 569-576.
465. D. P. Summers, S. Leach and K. W. Frese, *J. Electroanal. Chem. Interf. Electrochem.*, 1986, **205**, 219-232.
466. A. Bandi, *J. Electrochem. Soc.*, 1990, **137**, 2157-2160.
467. J. P. Popic, M. L. Avramovic and N. B. Vukovic, *J. Electroanal. Chem.*, 1997, **421**, 105-110.
468. M. Le, M. Ren, Z. Zhang, P. T. Sprunger, R. L. Kurtz and J. C. Flake, *J. Electrochem. Soc.*, 2011, **158**, E45-E49.
469. S. S. Hossain, S. U. Rahman and S. Ahmed, *J. Nanomater.*, 2014, **2014**, 9.
470. N. Spataru, K. Tokuhito, C. Terashima, T. N. Rao and A. Fujishima, *J. Appl. Electrochem.*, 2003, **33**, 1205-1210.
471. H.-P. Yang, Y.-N. Yue, S. Qin, H. Wang and J.-X. Lu, *Green Chem.*, 2016, **18**, 3216-3220.
472. M. G. Kim, J. Jeong, Y. Choi, J. Park, E. Park, C. H. Cheon, N. K. Kim, B. K. Min and W. Kim, *ACS Appl. Mater. Interfaces*, 2020, **12**, 11890-11897.
473. J. Qu, X. Zhang, Y. Wang and C. Xie, *Electrochim. Acta*, 2005, **50**, 3576-3580.
474. H.-P. Yang, S. Qin, H. Wang and J.-X. Lu, *Green Chem.*, 2015, **17**, 5144-5148.
475. L. Lu, X. Sun, J. Ma, D. Yang, H. Wu, B. Zhang, J. Zhang and B. Han, *Angew. Chem. Int. Ed.*, 2018, **57**, 14149-14153.
476. X. Sun, Q. Zhu, X. Kang, H. Liu, Q. Qian, Z. Zhang and B. Han, *Angew. Chem. Int. Ed.*, 2016, **128**, 6883-6887.
477. A. P. Periasamy, R. Ravindranath, S. M. Senthil Kumar, W. P. Wu, T. R. Jian and H. T. Chang, *Nanoscale*, 2018, **10**, 11869-11880.
478. D. Yang, Q. Zhu, C. Chen, H. Liu, Z. Liu, Z. Zhao, X. Zhang, S. Liu and B. Han, *Nat. Commun.*, 2019, **10**, 677.
479. A. A. Ensafi, H. A. Alinajafi, M. Jafari-Asl and B. Rezaei, *J. Electroanal. Chem.*, 2017, **804**, 29-35.
480. Q. H. Low, N. W. X. Loo, F. Calle-Vallejo and B. S. Yeo, *Angew. Chem. Int. Ed.*, 2019,

- 58**, 2256-2260.
481. L. Ji, L. Li, X. Ji, Y. Zhang, S. Mou, T. Wu, Q. Liu, B. Li, X. Zhu, Y. Luo, X. Shi, A. M. Asiri and X. Sun, *Angew. Chem. Int. Ed.*, 2020, **59**, 758-762.
482. S. Payra, S. Shenoy, C. Chakraborty, K. Tarafder and S. Roy, *ACS Appl. Mater. Interfaces*, 2020, **12**, 19402-19414..
483. F. Jia, X. Yu and L. Zhang, *J. Power Sources*, 2014, **252**, 85-89.
484. Y. Wu, Z. Jiang, X. Lu, Y. Liang and H. Wang, *Nature*, 2019, **575**, 639-642.
485. S. Mou, T. Wu, J. Xie, Y. Zhang, L. Ji, H. Huang, T. Wang, Y. Luo, X. Xiong, B. Tang and X. Sun, *Adv. Mater.*, 2019, **31**, 1903499.
486. F. Y. Zhang, T. Sheng, N. Tian, L. Liu, C. Xiao, B. A. Lu, B. B. Xu, Z. Y. Zhou and S. G. Sun, *Chem. Commun.*, 2017, **53**, 8085-8088.
487. H. Yang, Y. Wu, G. Li, Q. Lin, Q. Hu, Q. Zhang, J. Liu and C. He, *J. Am. Chem. Soc.*, 2019, **141**, 12717-12723.
488. J. Yuan, J. J. Zhang, M. P. Yang, W. J. Meng, H. Wang and J. X. Lu, *Catalysts*, 2018, **8**, 171.
489. Y. Song, W. Chen, C. Zhao, S. Li, W. Wei and Y. Sun, *Angew. Chem. Int. Ed.*, 2017, **56**, 10840-10844.
490. Y. Liu, Y. Zhang, K. Cheng, X. Quan, X. Fan, Y. Su, S. Chen, H. Zhao, Y. Zhang, H. Yu and M. R. Hoffmann, *Angew. Chem. Int. Ed.*, 2017, **56**, 15607-15611.
491. K. Lv, Y. Fan, Y. Zhu, Y. Yuan, J. Wang, Y. Zhu and Q. Zhang, *J. Mater. Chem. A*, 2018, **6**, 5025-5031.
492. S. Lee, G. Park and J. Lee, *ACS Catal.*, 2017, **7**, 8594-8604.
493. A. Dutta, I. Z. Montiel, R. Erni, K. Kiran, M. Rahaman, J. Drnec and P. Broekmann, *Nano Energy*, 2020, **68**, 104331.
494. Y. Hori, A. Murata, R. Takahashi and S. Suzuki, *J. Chem. Soc., Chem. Commun.*, 1988, **1**, 17-19.
495. C. Yang, H. Shen, A. Guan, J. Liu, T. Li, Y. Ji, A. M. Al-Enizi, L. Zhang, L. Qian and G. Zheng, *J. Colloid Interf. Sci.*, 2020, **570**, 375-381.
496. D. Ren, B. S.-H. Ang and B. S. Yeo, *ACS Catal.*, 2016, **6**, 8239-8247.
497. Y. C. Li, Z. Wang, T. Yuan, D.-H. Nam, M. Luo, J. Wicks, B. Chen, J. Li, F. Li, F. P. G.

- de Arguer, Y. Wang, C.-T. Dinh, O. Voznyy, D. Sinton and E. H. Sargent, *J. Am. Chem. Soc.*, 2019, **141**, 8584-8591.
498. M. Luo, Z. Wang, Y. C. Li, J. Li, F. Li, Y. Lum, D. H. Nam, B. Chen, J. Wicks, A. Xu, T. Zhuang, W. R. Leow, X. Wang, C. T. Dinh, Y. Wang, Y. Wang, D. Sinton and E. H. Sargent, *Nat. Commun.*, 2019, **10**, 5814.
499. H. Han, Y. Noh, Y. Kim, S. Park, W. Yoon, D. Jang, S. M. Choi and W. B. Kim, *Green Chem.*, 2020, **22**, 71-84.
500. Y. Zhang, K. Li, M. Chen, J. Wang, J. Liu and Y. Zhang, *ACS Appl. Nano Mater.*, 2020, **3**, 257-263.
501. J. Yuan, M.-P. Yang, W.-Y. Zhi, H. Wang, H. Wang and J.-X. Lu, *J. CO2 Util.*, 2019, **33**, 452-460.
502. X. Wang, Z. Y. Wang, F. P. G. de Arquer, C. T. Dinh, A. Ozden, Y. G. C. Li, D. H. Nam, J. Li, Y. S. Liu, J. Wicks, Z. T. Chen, M. F. Chi, B. Chen, Y. Wang, J. Tam, J. Y. Howe, A. Proppe, P. Todorovic, F. W. Li, T. T. Zhuang, C. M. Gabardo, A. R. Kirmani, C. McCallum, S. F. Hung, Y. W. Lum, M. C. Luo, Y. M. Min, A. N. Xu, C. P. O'Brien, B. Stephen, B. Sun, A. H. Ip, L. J. Richter, S. O. Kelley, D. Sinton and E. H. Sargent, *Nature Energy*, 2020, **5**, 478-486.
503. H. Wang, Y.-K. Tzeng, Y. Ji, Y. Li, J. Li, X. Zheng, A. Yang, Y. Liu, Y. Gong, L. Cai, Y. Li, X. Zhang, W. Chen, B. Liu, H. Lu, N. A. Melosh, Z.-X. Shen, K. Chan, T. Tan, S. Chu and Y. Cui, *Nat. Nanotechnol.*, 2020, **15**, 131-137.
504. A. R. Paris and A. B. Bocarsly, *ACS Catal.*, 2017, **7**, 6815-6820.
505. D. Ren, N. T. Wong, A. D. Handoko, Y. Huang and B. S. Yeo, *J. Phys. Chem. Lett.*, 2016, **7**, 20-24.
506. D. F. Gao, F. Sohoken and B. Roldan Cuenya, *ACS Catal.*, 2017, **7**, 5112-5120.
507. R. L. Cook, R. C. MacDuff and A. F. Sammells, *J. Electrochem. Soc.*, 1987, **134**, 1873-1874.
508. R. L. Cook, R. C. MacDuff and A. F. Sammells, *J. Electrochem. Soc.*, 1987, **134**, 2375-2376.
509. Y. Hori, I. Takahashi, O. Koga and N. Hoshi, *J. Phys. Chem. B*, 2002, **106**, 15-17.
510. Y. Hori, I. Takahashi, O. Koga and N. Hoshi, *J. Molecular Catal. A-Chemical*, 2003, **199**,

39-47.

511. W. Tang, A. A. Peterson, A. S. Varela, Z. P. Jovanov, L. Bech, W. J. Durand, S. Dahl, J. K. Norskov and I. Chorkendorff, *Phys. Chem. Chem. Phys.*, 2012, **14**, 76-81.
512. Y. Huang, A. D. Handoko, P. Hirunsit and B. S. Yeo, *ACS Catal.*, 2017, **7**, 1749-1756.
513. Y. Lum and J. W. Ager, *Angew. Chem. Int. Ed.*, 2018, **130**, 560-563.
514. A. S. Varela, W. Ju, T. Reier and P. Strasser, *ACS Catal.*, 2016, **6**, 2136-2144.
515. A. S. Varela, M. Kroschel, T. Reier and P. Strasser, *Cataly. Today*, 2016, **260**, 8-13.
516. K. Ogura, H. Yano and F. Shirai, *J. Electrochem. Soc.*, 2003, **150**, 163-168.
517. T. Qin, Y. Qian, F. Zhang and B.-L. Lin, *Chin. Chem. Lett.*, 2019, **30**, 314-318.
518. H. Yano, T. Tanaka, M. Nakayama and K. Ogura, *J. Electroanal. Chem.*, 2004, **565**, 287-293.
519. M. S. Xie, B. Y. Xia, Y. W. Li, Y. Yan, Y. H. Yang, Q. Sun, S. H. Chan, A. Fisher and X. Wang, *Energy Environ. Sci.*, 2016, **9**, 1687-1695.
520. D. Wakerley, S. Lamaison, F. Ozanam, N. Menguy, D. Mercier, P. Marcus, M. Fontecave and V. Mougel, *Nat. Mater.*, 2019, **18**, 1222-1227.
521. Y. Gao, Q. Wu, X. Liang, Z. Wang, Z. Zheng, P. Wang, Y. Liu, Y. Dai, M. H. Whangbo and B. Huang, *Adv. Sci.*, 2020, **7**, 1902820.
522. D. H. Nam, O. S. Bushuyev, J. Li, P. De Luna, A. Seifitokaldani, C. T. Dinh, F. P. Garcia de Arquer, Y. Wang, Z. Liang, A. H. Proppe, C. S. Tan, P. Todorovic, O. Shekhah, C. M. Gabardo, J. W. Jo, J. Choi, M. J. Choi, S. W. Baek, J. Kim, D. Sinton, S. O. Kelley, M. Eddaoudi and E. H. Sargent, *J. Am. Chem. Soc.*, 2018, **140**, 11378-11386.
523. Y. Zhou, F. Che, M. Liu, C. Zou, Z. Liang, P. De Luna, H. Yuan, J. Li, Z. Wang, H. Xie, H. Li, P. Chen, E. Bladt, R. Quintero-Bermudez, T. K. Sham, S. Bals, J. Hofkens, D. Sinton, G. Chen and E. H. Sargent, *Nat. Chem.*, 2018, **10**, 974-980.
524. M. Esmailirad, A. Kondori, B. Song, A. R. Belmonte, J. Wei, K. Kucuk, S. M. Khanvilkar, E. Efimoff, W. Chen, C. U. Segre, R. Shahbazian-Yassar and M. Asadi, *ACS Nano*, 2020, **14**, 2099-2108.
525. X. Tan, C. Yu, C. Zhao, H. Huang, X. Yao, X. Han, W. Guo, S. Cui, H. Huang and J. Qiu, *ACS Appl. Mater. Interfaces*, 2019, **11**, 9904-9910.
526. C. Chen, X. Sun, X. Yan, Y. Wu, M. Liu, S. Liu, Z. Zhao and B. Han, *Green Chem.*, 2020,

- 22**, 1572-1576.
527. J. Gao, H. Zhang, X. Guo, J. Luo, S. M. Zakeeruddin, D. Ren and M. Gratzel, *J. Am. Chem. Soc.*, 2019, **141**, 18704-18714.
528. I. Merino-Garcia, J. Albo, J. Solla-Gullon, V. Montiel and A. Irabien, *J. CO2 Util.*, 2019, **31**, 135-142.
529. C. T. Dinh, T. Burdyny, M. G. Kibria, A. Seifitokaldani, C. M. Gabardo, F. P. Garcia de Arquer, A. Kiani, J. P. Edwards, P. De Luna, O. S. Bushuyev, C. Zou, R. Quintero-Bermudez, Y. Pang, D. Sinton and E. H. Sargent, *Science*, 2018, **360**, 783-787.
530. D. Kim, S. Lee, J. D. Ocon, B. Jeong, J. K. Lee and J. Lee, *Phys. Chem. Chem. Phys.*, 2015, **17**, 824-830.
531. Z. Xu, T. Wu, Y. Cao, X. Zeng, P. Lin and W.-W. Zhao, *J. Catal.*, 2020, **383**, 42-50.
532. H. Mistry, A. S. Varela, C. S. Bonifacio, I. Zegkinoglou, I. Sinev, Y. W. Choi, K. Kisslinger, E. A. Stach, J. C. Yang, P. Strasser and B. R. Cuenya, *Nat. Commun.*, 2016, **7**, 12123.
533. R. Kas, R. Kortlever, A. Milbrat, M. T. Koper, G. Mul and J. Baltrusaitis, *Phys. Chem. Chem. Phys.*, 2014, **16**, 12194-12201.
534. P. P. Yang, X. L. Zhang, F. Y. Gao, Y. R. Zheng, Z. Z. Niu, X. Yu, R. Liu, Z. Z. Wu, S. Qin, L. P. Chi, Y. Duan, T. Ma, X. S. Zheng, J. F. Zhu, H. J. Wang, M. R. Gao and S. H. Yu, *J. Am. Chem. Soc.*, 2020, **142**, 6400-6408.
535. D. X. Tan, J. L. Zhang, L. Yao, X. N. Tan, X. Y. Cheng, Q. Wan, B. X. Han, L. R. Zheng and J. Zhang, *Nano Res.*, 2020, **13**, 768-774.
536. K. Manthiram, B. J. Beberwyck and A. P. Alivisatos, *J. Am. Chem. Soc.*, 2014, **136**, 13319-13325.
537. X. Wang, A. Xu, F. Li, S. F. Hung, D. H. Nam, C. M. Gabardo, Z. Wang, Y. Xu, A. Ozden, A. S. Rasouli, A. H. Ip, D. Sinton and E. H. Sargent, *J. Am. Chem. Soc.*, 2020, **142**, 3525-3531.
538. A. Loiudice, P. Lobaccaro, E. A. Kamali, T. Thao, B. H. Huang, J. W. Ager and R. Buonsanti, *Angew. Chem. Int. Ed.*, 2016, **55**, 5789-5792.
539. Y. Wang, H. Shen, K. J. T. Livi, D. Raciti, H. Zong, J. Gregg, M. Onadeko, Y. Wan, A. Watson and C. Wang, *Nano Lett.*, 2019, **19**, 8461-8468.

540. G. L. De Gregorio, T. Burdyny, A. Loiudice, P. Iyengar, W. A. Smith and R. Buonsanti, *ACS Catal.*, 2020, **10**, 4854-4862.
541. D. Kim, C. S. Kley, Y. Li and P. Yang, *Proc. Natl. Acad. Sci. U.S.A.*, 2017, **114**, 10560-10565.
542. H. S. Jeon, S. Kunze, F. Scholten and B. Roldan Cuenya, *ACS Catal.*, 2017, **8**, 531-535.
543. Y. Huo, X. Peng, X. Liu, H. Li and J. Luo, *ACS Appl. Mater. Interfaces*, 2018, **10**, 12618-12625.
544. H. Ning, X. Wang, W. Wang, Q. Mao, Z. Yang, Q. Zhao, Y. Song and M. Wu, *Carbon*, 2019, **146**, 218-223.
545. H. Ning, Q. Mao, W. Wang, Z. Yang, X. Wang, Q. Zhao, Y. Song and M. Wu, *J. Alloys Compd.*, 2019, **785**, 7-12.
546. W. Wang, H. Ning, Z. Yang, Z. Feng, J. Wang, X. Wang, Q. Mao, W. Wu, Q. Zhao, H. Hu, Y. Song and M. Wu, *Electrochim. Acta*, 2019, **306**, 360-365.
547. H. Jung, S. Y. Lee, C. W. Lee, M. K. Cho, D. H. Won, C. Kim, H. S. Oh, B. K. Min and Y. J. Hwang, *J. Am. Chem. Soc.*, 2019, **141**, 4624-4633.
548. A. Guan, Z. Chen, Y. Quan, C. Peng, Z. Wang, T.-K. Sham, C. Yang, Y. Ji, L. Qian, X. Xu and G. Zheng, *ACS Energy Lett.*, 2020, **5**, 1044-1053..
549. Y.-L. Qiu, H.-X. Zhong, T.-T. Zhang, W.-B. Xu, X.-F. Li and H.-M. Zhang, *ACS Catal.*, 2017, **7**, 6302-6310.
550. Y. Lum, Y. Kwon, P. Lobaccaro, L. Chen, E. L. Clark, A. T. Bell and J. W. Ager, *ACS Catal.*, 2015, **6**, 202-209.
551. Z. Wang, G. Yang, Z. Zhang, M. Jin and Y. Yin, *ACS Nano*, 2016, **10**, 4559-4564.
552. A. Thevenon, A. Rosas-Hernandez, J. C. Peters and T. Agapie, *Angew. Chem. Int. Ed.*, 2019, **58**, 16952-16958.
553. J. Xie, Y. Huang and H. Yu, *Front. Environ. Sci. Eng.*, 2015, **9**, 861-866.
554. T. T. H. Hoang, S. Ma, J. I. Gold, P. J. A. Kenis and A. A. Gewirth, *ACS Catal.*, 2017, **7**, 3313-3321.
555. T. T. H. Hoang, S. Verma, S. Ma, T. T. Fister, J. Timoshenko, A. I. Frenkel, P. J. A. Kenis and A. A. Gewirth, *J. Am. Chem. Soc.*, 2018, **140**, 5791-5797.
556. X. Chen, D. A. Henckel, U. O. Nwabara, Y. Li, A. I. Frenkel, T. T. Fister, P. J. A. Kenis

- and A. A. Gewirth, *ACS Catal.*, 2020, **10**, 672-682.
557. J. Wang, Z. Li, C. Dong, Y. Feng, J. Yang, H. Liu and X. Du, *ACS Appl. Mater. Interfaces*, 2019, **11**, 2763-2767.
558. S. Y. Lee, H. Jung, N. K. Kim, H. S. Oh, B. K. Min and Y. J. Hwang, *J. Am. Chem. Soc.*, 2018, **140**, 8681-8689.
559. C. Reller, R. Krause, E. Volkova, B. Schmid, S. Neubauer, A. Rucki, M. Schuster and G. Schmid, *Adv. Energy Mater.*, 2017, **7**, 1602114.
560. M. R. Goncalves, A. Gomes, J. Condeco, T. R. C. Fernandes, T. Pardal, C. A. C. Sequeira and J. B. Branco, *Electrochim. Acta*, 2013, **102**, 388-392.
561. A. Dutta, M. Rahaman, N. C. Luedi, M. Mohos and P. Broekmann, *ACS Catal.*, 2016, **6**, 3804-3814.
562. K. D. Yang, W. R. Ko, J. H. Lee, S. J. Kim, H. Lee, M. H. Lee and K. T. Nam, *Angew. Chem. Int. Ed.*, 2017, **129**, 814-818.
563. F.-S. Ke, X.-C. Liu, J. Wu, P. P. Sharma, Z.-Y. Zhou, J. Qiao and X.-D. Zhou, *Catal. Today*, 2017, **288**, 18-23.
564. Y. Peng, T. Wu, L. Sun, J. M. V. Nsanzimana, A. C. Fisher and X. Wang, *ACS Appl. Mater. Interfaces*, 2017, **9**, 32782-32789.
565. D. Ren, Y. Deng, A. D. Handoko, C. S. Chen, S. Malkhandi and B. S. Yeo, *ACS Catal.*, 2015, **5**, 2814-2821.
566. P. De Luna, R. Quintero-Bermudez, D. Cao-Thang, M. B. Ross, O. S. Bushuyev, P. Todorovic, T. Regier, S. O. Kelley, P. Yang and E. H. Sargent, *Nat. Catal.*, 2018, **1**, 103-110.
567. N. Martic, C. Reller, C. Macauley, M. Loeffler, B. Schmid, D. Reinisch, E. Volkova, A. Maltenberger, A. Rucki, K. J. J. Mayrhofer and G. Schmid, *Energy Environ Sci.*, 2020, **13**, 2993-3006.
568. Z. Yin, C. Yu, Z. Zhao, X. Guo, M. Shen, N. Li, M. Muzzio, J. Li, H. Liu, H. Lin, J. Yin, G. Lu, D. Su and S. Sun, *Nano Lett.*, 2019, **19**, 8658-8663.
569. M. Ebaid, K. Jiang, Z. Zhang, W. S. Drisdell, A. T. Bell and J. K. Cooper, *Chem. Mater.*, 2020, **32**, 3304-3311.
570. C. S. Chen, J. H. Wan and B. S. Yeo, *J. Phys. Chem. C*, 2015, **119**, 26875-26882.

571. E. Andrews, M. Ren, F. Wang, Z. Zhang, P. Sprunger, R. Kurtz and J. Flake, *J. Electrochem. Soc.*, 2013, **160**, 841-846.
572. D. Wu, C. Dong, D. Wu, J. Fu, H. Liu, S. Hu, Z. Jiang, S. Z. Qiao and X.-W. Du, *J. Mater. Chem. A*, 2018, **6**, 9373-9377.
573. S. B. Varandili, J. Huang, E. Oveisi, G. L. De Gregorio, M. Mensi, M. Strach, J. Vavra, C. Gadiyar, A. Bhowmik and R. Buonsanti, *ACS Catal.*, 2019, **9**, 5035-5046.
574. S. Chen, Y. Su, P. Deng, R. Qi, J. Zhu, J. Chen, Z. Wang, L. Zhou, X. Guo and B. Y. Xia, *ACS Catal.*, 2020, **10**, 4640-4646.
575. J. Wu, S. Ma, J. Sun, J. I. Gold, C. Tiwary, B. Kim, L. Zhu, N. Chopra, I. N. Odeh, R. Vajtai, A. Z. Yu, R. Luo, J. Lou, G. Ding, P. J. A. Kenis and P. M. Ajayan, *Nat. Commun.*, 2016, **7**, 13869.
576. X. Sun, X. Kang, Q. Zhu, J. Ma, G. Yang, Z. Liu and B. Han, *Chem Sci*, 2016, **7**, 2883-2887.
577. X. Liu, H. Yang, J. He, H. Liu, L. Song, L. Li and J. Luo, *Small*, 2018, **14**, e1704049.
578. Z. Zhao, X. Peng, X. Liu, X. Sun, J. Shi, L. Han, G. Li and J. Luo, *J. Mater. Chem. A*, 2017, **5**, 20239-20243.
579. I. Takahashi, O. Koga, N. Hoshi and Y. Hori, *J. Electroanal. Chem.*, 2002, **533**, 135-143.
580. Y. Liu, S. Chen, X. Quan and H. Yu, *J. Am. Chem. Soc.*, 2015, **137**, 11631-11636.
581. X. Wang, Z. Chen, X. Zhao, T. Yao, W. Chen, R. You, C. Zhao, G. Wu, J. Wang, W. Huang, J. Yang, X. Hong, S. Wei, Y. Wu, Y. Li, *Angew. Chem. Int. Ed.* 2018, **57**, 1944-1948.
582. C. Genovese, C. Ampelli, S. Perathoner and G. Centi, *Green Chem.*, 2017, **19**, 2406-2415.
583. C. Genovese, M. E. Schuster, E. K. Gibson, D. Gianolio, V. Posligua, R. Grau-Crespo, G. Cibin, P. P. Wells, D. Garai, V. Solokha, S. Krick Calderon, J. J. Velasco-Velez, C. Ampelli, S. Perathoner, G. Held, G. Centi and R. Arrigo, *Nat. Commun.*, 2018, **9**, 935.
584. B. Zha, C. Li and J. Li, *J. Catal.*, 2020, **382**, 69-76.
585. Q. Zhu, X. Sun, D. Yang, J. Ma, X. Kang, L. Zheng, J. Zhang, Z. Wu and B. Han, *Nat. Commun.*, 2019, **10**, 3851.
586. Y. Oh, H. Vrubel, S. Guidoux and X. Hu, *Chem. Commun.*, 2014, **50**, 3878-3881.
587. A. R. Paris and A. B. Bocarsly, *ACS Catal.*, 2019, **9**, 2324-2333.
